# Supplementary material for: Concise preparation of fluorine-containing carbocycles involving the Diels–Alder reaction using fluorinated alkene or diene derivatives
Source: Royal Society of Chemistry journal article supplement (doi:10.1039/c6ra00569a), 2016-01-01

# *Supplementary Information*

Concise preparation of fluorine-containing carbocycles involving Diels-Alder reaction using fluorinated alkene or diene derivatives

Shigeyuki Yamada, Kazunori Hondo, Tsutomu Konno\*, Takashi Ishihara

*Faculty of Molecular Chemistry and Engineering, Kyoto Institute of Technology,*

*Matsugasaki, Sakyo-ku, Kyoto 606-8585, Japan*

**Cartesian coordinates and calculated potential energies (atomic units) of the optimized structures**

**(E)-1-Phenylbuta-1,3-diene (2A)**

E = -387.15145104H

|   |           |           |           |
|---|-----------|-----------|-----------|
| C | 2.442748  | -1.226916 | 0.152565  |
| C | 1.058331  | -1.118164 | 0.115090  |
| C | 0.435072  | 0.134859  | -0.028316 |
| C | 1.258728  | 1.270053  | -0.116261 |
| C | 2.645989  | 1.162225  | -0.077102 |
| C | 3.245567  | -0.088150 | 0.055348  |
| H | 2.900835  | -2.203366 | 0.265644  |
| H | 0.455805  | -2.013964 | 0.209432  |
| H | 0.799257  | 2.247627  | -0.220981 |
| H | 3.257840  | 2.054518  | -0.149506 |
| H | 4.325441  | -0.177024 | 0.088179  |
| C | -1.952913 | -0.652401 | -0.195931 |
| H | -1.637995 | -1.686714 | -0.308930 |
| C | -3.398577 | -0.431471 | -0.223815 |
| H | -3.975160 | -1.185915 | -0.755402 |
| C | -1.018972 | 0.310555  | -0.085082 |
| H | -1.354477 | 1.345035  | -0.060953 |
| C | -4.062009 | 0.576667  | 0.356416  |
| H | -3.557685 | 1.329557  | 0.952754  |
| H | -5.137659 | 0.666698  | 0.262299  |

**Methyl  $\alpha,\beta$ -trifluoroacrylate**

E = -604.34789888H

|   |           |           |           |
|---|-----------|-----------|-----------|
| C | -1.269183 | 1.040139  | 0.000000  |
| C | 0.000000  | 0.618013  | 0.000000  |
| F | -2.327418 | 0.274124  | 0.000000  |
| F | -1.588474 | 2.315872  | 0.000000  |
| F | 0.963126  | 1.558215  | 0.000000  |
| C | 0.407977  | -0.804605 | 0.000000  |
| O | -0.367426 | -1.729914 | 0.000000  |
| O | 1.742646  | -0.913846 | 0.000000  |
| C | 2.258946  | -2.260998 | 0.000000  |
| H | 1.923185  | -2.793972 | 0.890007  |
| H | 1.923185  | -2.793972 | -0.890007 |
| H | 3.340330  | -2.151166 | 0.000000  |

**Int-EndoA**

E = -991.50170766H

|   |          |          |          |
|---|----------|----------|----------|
| C | 0.878108 | 1.491892 | 0.236779 |
|---|----------|----------|----------|

|   |           |           |           |
|---|-----------|-----------|-----------|
| C | -2.136048 | -0.955256 | 0.479787  |
| C | -3.239688 | -0.262895 | 0.181830  |
| C | -1.663148 | 3.240690  | 0.330831  |
| C | 0.209375  | 2.024346  | -0.803436 |
| C | -1.111133 | 2.650056  | -0.737377 |
| H | 0.388747  | 1.477002  | 1.208198  |
| F | -1.825655 | -1.086682 | 1.784863  |
| C | -1.230110 | -1.562534 | -0.519898 |
| F | -3.691630 | -0.029427 | -1.022154 |
| F | -4.011432 | 0.269576  | 1.104875  |
| H | -2.659467 | 3.663998  | 0.283271  |
| H | -1.135844 | 3.337069  | 1.274069  |
| H | 0.645591  | 1.969851  | -1.797433 |
| H | -1.674890 | 2.640976  | -1.667791 |
| O | -1.408955 | -1.510177 | -1.713324 |
| O | -0.202034 | -2.170334 | 0.083737  |
| C | 0.771222  | -2.774528 | -0.793474 |
| H | 1.223112  | -2.014929 | -1.431309 |
| H | 0.299203  | -3.539811 | -1.410433 |
| H | 1.515961  | -3.211656 | -0.133731 |
| C | 3.075815  | 0.960436  | -0.895728 |
| C | 4.323277  | 0.348637  | -0.872498 |
| C | 4.744993  | -0.356253 | 0.257215  |
| C | 3.904648  | -0.438538 | 1.365654  |
| C | 2.653822  | 0.172076  | 1.340863  |
| C | 2.209102  | 0.877737  | 0.209700  |
| H | 2.778347  | 1.520084  | -1.774802 |
| H | 4.976042  | 0.429432  | -1.734757 |
| H | 5.721545  | -0.826652 | 0.273983  |
| H | 4.223201  | -0.976760 | 2.251511  |
| H | 2.003397  | 0.099077  | 2.206170  |

**TS-EndoA**

E = -991.47006195H

|   |           |           |           |
|---|-----------|-----------|-----------|
| C | -0.420128 | -1.420003 | 0.161341  |
| C | 1.583745  | 0.747375  | 0.503015  |
| C | 2.764673  | 0.045196  | 0.228310  |
| C | 2.492258  | -1.917209 | 0.184805  |
| C | 0.265884  | -1.959967 | -0.898778 |
| C | 1.650577  | -2.218950 | -0.884885 |
| H | 0.073992  | -1.356901 | 1.124127  |
| F | 1.277529  | 0.850769  | 1.819028  |
| C | 0.735445  | 1.406531  | -0.474426 |
| F | 3.371973  | 0.245933  | -0.946267 |
| F | 3.680225  | 0.030456  | 1.224939  |
| H | 3.533836  | -2.209181 | 0.102582  |
| H | 2.105439  | -1.961010 | 1.198165  |
| H | -0.249956 | -2.114512 | -1.840032 |
| H | 2.104968  | -2.52175  | -1.822660 |

|   |           |           |           |
|---|-----------|-----------|-----------|
| O | 0.884535  | 1.335467  | -1.678941 |
| O | -0.226672 | 2.142400  | 0.129865  |
| C | -1.084195 | 2.883073  | -0.754903 |
| H | -1.639626 | 2.207542  | -1.406442 |
| H | -0.500043 | 3.573527  | -1.365209 |
| H | -1.764181 | 3.428706  | -0.104348 |
| C | -2.605220 | -0.948322 | -0.998049 |
| C | -3.929498 | -0.537732 | -0.935290 |
| C | -4.492324 | -0.151680 | 0.284062  |
| C | -3.716258 | -0.176556 | 1.442142  |
| C | -2.390591 | -0.588977 | 1.381957  |
| C | -1.808688 | -0.991456 | 0.164212  |
| H | -2.184047 | -1.228474 | -1.955697 |
| H | -4.527512 | -0.513072 | -1.839289 |
| H | -5.526710 | 0.169749  | 0.327726  |
| H | -4.143821 | 0.127986  | 2.390511  |
| H | -1.786861 | -0.597905 | 2.282808  |

**P-EndoA**

E = -991.55434120H

|   |           |           |           |
|---|-----------|-----------|-----------|
| C | -0.191455 | -1.161100 | 0.012562  |
| C | 0.790635  | -0.031287 | 0.455134  |
| C | 2.297447  | -0.510976 | 0.337468  |
| C | 2.485478  | -1.925963 | -0.198992 |
| C | 0.292296  | -1.807945 | -1.266912 |
| C | 1.564534  | -2.187900 | -1.360221 |
| H | -0.071911 | -1.902678 | 0.814291  |
| F | 0.537657  | 0.229807  | 1.792845  |
| C | 0.599919  | 1.265587  | -0.360701 |
| F | 2.977458  | 0.363507  | -0.485783 |
| F | 2.894076  | -0.406100 | 1.560130  |
| H | 3.538848  | -2.039320 | -0.459559 |
| H | 2.278546  | -2.615760 | 0.628757  |
| H | -0.410529 | -1.962591 | -2.075554 |
| H | 1.954710  | -2.665761 | -2.250640 |
| O | 0.388692  | 1.270961  | -1.546187 |
| O | 0.714068  | 2.348128  | 0.404701  |
| C | 0.586361  | 3.614710  | -0.275294 |
| H | -0.397174 | 3.695160  | -0.738945 |
| H | 1.359271  | 3.709969  | -1.038444 |
| H | 0.710939  | 4.367629  | 0.498812  |
| C | -2.297400 | -0.205480 | -1.087019 |
| C | -3.643081 | 0.152951  | -1.029315 |
| C | -4.367012 | -0.013745 | 0.149551  |
| C | -3.736063 | -0.543610 | 1.273098  |
| C | -2.392314 | -0.905289 | 1.212789  |
| C | -1.653607 | -0.740561 | 0.035120  |

|   |           |           |           |
|---|-----------|-----------|-----------|
| H | -1.744183 | -0.050678 | -2.004669 |
| H | -4.124915 | 0.564720  | -1.909208 |
| H | -5.414073 | 0.264588  | 0.191435  |
| H | -4.288975 | -0.680138 | 2.195710  |
| H | -1.909771 | -1.319134 | 2.091568  |

**Int-ExoA**

E = -991.50211930H

|   |           |           |           |
|---|-----------|-----------|-----------|
| C | 0.974073  | -1.484073 | -0.164364 |
| C | -2.445596 | 0.912010  | 0.334407  |
| C | -3.147946 | 0.077904  | -0.439240 |
| C | -1.495894 | -3.316987 | -0.382254 |
| C | 0.422738  | -2.234845 | 0.807843  |
| C | -0.879590 | -2.897122 | 0.730711  |
| C | 2.285795  | -0.829595 | -0.142344 |
| H | 0.392418  | -1.304764 | -1.065331 |
| C | -1.237367 | 1.643336  | -0.104947 |
| F | -2.868807 | 1.082060  | 1.601326  |
| F | -4.215374 | -0.557182 | -0.007279 |
| F | -2.884982 | -0.206887 | -1.687472 |
| H | -2.471742 | -3.786024 | -0.338091 |
| H | -1.041061 | -3.223764 | -1.362689 |
| H | 0.949302  | -2.354056 | 1.751384  |
| H | -1.367649 | -3.078807 | 1.686283  |
| C | 2.600214  | 0.086469  | -1.161463 |
| C | 3.829302  | 0.740441  | -1.188604 |
| C | 4.775740  | 0.493421  | -0.196270 |
| C | 3.256767  | -1.073439 | 0.846141  |
| H | 1.862911  | 0.292117  | -1.929944 |
| H | 4.047606  | 1.441411  | -1.986770 |
| C | 4.481590  | -0.417804 | 0.820795  |
| H | 5.735236  | 0.997657  | -0.216337 |
| H | 3.058387  | -1.790838 | 1.633895  |
| H | 5.216119  | -0.624107 | 1.591524  |
| O | -0.743609 | 2.384580  | 0.892625  |
| H | 1.264633  | 2.449435  | 0.326446  |
| O | -0.772703 | 1.571160  | -1.218575 |
| H | 0.270999  | 3.818184  | -0.237213 |
| H | 0.687843  | 3.675052  | 1.500219  |
| C | 0.454833  | 3.130395  | 0.588763  |

**TS-ExoA**

E = -991.46975456H

|   |           |           |           |
|---|-----------|-----------|-----------|
| C | 0.475373  | -1.255062 | -0.618358 |
| C | -1.600932 | 0.562653  | 0.575055  |
| C | -2.762564 | -0.007487 | 0.035022  |

|   |           |           |           |   |           |           |           |
|---|-----------|-----------|-----------|---|-----------|-----------|-----------|
| C | -2.413854 | -1.629881 | -1.033964 | H | -1.707065 | -3.778358 | -0.582540 |
| C | -0.238675 | -2.285777 | -0.057959 | C | 2.433051  | 0.176359  | -1.174935 |
| C | -1.614414 | -2.495364 | -0.287579 | C | 3.772152  | 0.458101  | -0.907296 |
| C | 1.856891  | -0.907023 | -0.333590 | C | 4.363167  | -0.009272 | 0.264004  |
| H | 0.020108  | -0.681355 | -1.417894 | C | 2.270762  | -1.040525 | 0.895876  |
| C | -0.787868 | 1.590727  | -0.044618 | H | 1.977474  | 0.544258  | -2.087977 |
| F | -1.283175 | 0.120996  | 1.810788  | H | 4.351754  | 1.038721  | -1.616318 |
| F | -3.631062 | -0.516743 | 0.935058  | C | 3.607727  | -0.759196 | 1.164846  |
| F | -3.431865 | 0.673208  | -0.908215 | H | 5.404757  | 0.206868  | 0.473609  |
| H | -3.445515 | -1.918373 | -1.206497 | H | 1.690778  | -1.616573 | 1.607221  |
| H | -1.971921 | -1.069482 | -1.851424 | H | 4.059456  | -1.124292 | 2.080479  |
| H | 0.249568  | -2.942480 | 0.654393  | O | -0.752898 | 2.345334  | 0.667819  |
| H | -2.098222 | -3.288175 | 0.273990  | H | 0.163059  | 3.947405  | -0.307703 |
| C | 2.531834  | -0.044058 | -1.219028 | O | -0.684588 | 1.700434  | -1.489715 |
| C | 3.861363  | 0.301921  | -1.007346 | H | -1.618255 | 3.940757  | -0.361423 |
| C | 4.543082  | -0.195545 | 0.102634  | H | -0.773570 | 4.301500  | 1.178899  |
| C | 2.557791  | -1.389500 | 0.789426  | C | -0.744606 | 3.728954  | 0.255431  |
| H | 2.001346  | 0.344583  | -2.081764 |   |           |           |           |
| H | 4.366398  | 0.958772  | -1.706482 |   |           |           |           |
| C | 3.883859  | -1.038660 | 1.000845  |   |           |           |           |
| H | 5.578985  | 0.075222  | 0.272169  |   |           |           |           |
| H | 2.055081  | -2.024760 | 1.508501  |   |           |           |           |
| H | 4.406960  | -1.415067 | 1.872572  |   |           |           |           |
| O | 0.083700  | 2.128621  | 0.836943  |   |           |           |           |
| H | 1.499681  | 2.878877  | -0.504771 |   |           |           |           |
| O | -0.885933 | 1.939642  | -1.207689 |   |           |           |           |
| H | 0.258575  | 4.040792  | 0.020450  |   |           |           |           |
| H | 1.521460  | 3.504082  | 1.171442  |   |           |           |           |
| C | 0.889827  | 3.208739  | 0.336562  |   |           |           |           |

#### P-ExoA

E = -991.55715818H

|   |           |           |           |
|---|-----------|-----------|-----------|
| C | 0.213875  | -0.887873 | -0.598809 |
| C | -0.776304 | -0.001221 | 0.221482  |
| C | -2.263519 | -0.538921 | 0.129779  |
| C | -2.467119 | -1.682025 | -0.852669 |
| C | -0.147593 | -2.354965 | -0.481542 |
| C | -1.413702 | -2.736557 | -0.631610 |
| C | 1.666847  | -0.575577 | -0.278475 |
| H | 0.040078  | -0.586798 | -1.637831 |
| C | -0.728425 | 1.448231  | -0.310380 |
| F | -0.412850 | -0.017884 | 1.554872  |
| F | -2.651790 | -0.949157 | 1.371737  |
| F | -3.109457 | 0.500938  | -0.199590 |
| H | -3.480509 | -2.060599 | -0.710885 |
| H | -2.407372 | -1.266698 | -1.865697 |
| H | 0.648296  | -3.070489 | -0.312028 |

#### Into-EndoB

E = -991.50110640H

|   |           |           |           |
|---|-----------|-----------|-----------|
| C | -1.307265 | 2.744757  | -0.914727 |
| C | -1.974208 | -1.048200 | -0.608760 |
| C | -0.794514 | -1.621608 | -0.349057 |
| C | 1.459741  | 1.538919  | -0.272440 |
| C | -0.717495 | 2.626842  | 0.282142  |
| C | 0.474425  | 1.838820  | 0.595078  |
| H | -2.178767 | 3.374259  | -1.049798 |
| H | -0.951006 | 2.211916  | -1.790032 |
| F | -2.325529 | -0.918527 | -1.902874 |
| C | -2.905828 | -0.546616 | 0.423164  |
| F | -0.298002 | -1.834692 | 0.840764  |
| F | 0.006147  | -2.051426 | -1.298717 |
| H | 1.393906  | 1.947102  | -1.278788 |
| H | -1.165402 | 3.144550  | 1.127971  |
| H | 0.555269  | 1.511496  | 1.628204  |
| O | -2.681959 | -0.576634 | 1.609956  |
| O | -4.023635 | -0.067328 | -0.138901 |
| C | -5.004455 | 0.459294  | 0.776476  |
| H | -4.582494 | 1.287883  | 1.346119  |
| H | -5.338645 | -0.319398 | 1.462935  |
| H | -5.825348 | 0.799831  | 0.150314  |
| C | 4.835703  | -0.037509 | -0.792483 |
| C | 3.666796  | 0.691476  | -0.991848 |
| C | 2.662220  | 0.742654  | -0.010488 |
| C | 2.868482  | 0.021144  | 1.179604  |
| C | 4.035808  | -0.704784 | 1.379845  |
| C | 5.026928  | -0.738111 | 0.396300  |

|   |          |           |           |
|---|----------|-----------|-----------|
| H | 5.595836 | -0.058663 | -1.565432 |
| H | 3.525477 | 1.236297  | -1.919738 |
| H | 2.107159 | 0.019423  | 1.950562  |
| H | 4.172564 | -1.254712 | 2.304413  |
| H | 5.934636 | -1.308947 | 0.555437  |

|   |           |           |           |
|---|-----------|-----------|-----------|
| C | -0.867306 | 0.569620  | 0.726543  |
| C | 0.368482  | 2.705640  | 0.242356  |
| C | -0.742369 | 2.075616  | 0.618489  |
| H | 1.806043  | 2.059166  | -1.226126 |
| H | 2.506246  | 2.490449  | 0.323527  |
| F | 1.797225  | 0.464809  | 1.661792  |
| C | 2.798349  | -0.236295 | -0.404123 |
| F | 0.079094  | -0.026029 | -1.394118 |
| F | 0.318591  | -1.444181 | 0.262231  |
| H | -0.710982 | 0.289915  | 1.774376  |
| H | 0.381138  | 3.790449  | 0.203062  |
| H | -1.625415 | 2.643794  | 0.891293  |
| O | 3.136615  | -0.031877 | -1.542763 |
| O | 3.346233  | -1.135299 | 0.410237  |
| C | 4.409022  | -1.931318 | -0.155859 |
| H | 5.229523  | -1.290407 | -0.480030 |
| H | 4.036848  | -2.503510 | -1.006086 |
| H | 4.727851  | -2.592603 | 0.645749  |
| C | -4.094907 | -1.467709 | 0.691123  |
| C | -2.848862 | -0.965002 | 1.060545  |
| C | -2.228853 | 0.034376  | 0.304860  |
| C | -2.882478 | 0.523121  | -0.831123 |
| C | -4.127982 | 0.021829  | -1.202310 |
| C | -4.738048 | -0.974971 | -0.442338 |
| H | -4.561988 | -2.241996 | 1.289375  |
| H | -2.352542 | -1.353566 | 1.943604  |
| H | -2.414053 | 1.296321  | -1.428985 |
| H | -4.621537 | 0.409649  | -2.086436 |
| H | -5.708390 | -1.363333 | -0.730612 |

**TS-EndoB**

E = -991.46066420H

|   |           |           |           |
|---|-----------|-----------|-----------|
| C | 1.651441  | 1.209196  | 1.705790  |
| C | 1.626855  | -0.617247 | 0.255809  |
| C | 0.324337  | -0.701269 | -0.271318 |
| C | -1.029270 | 0.638292  | 0.812970  |
| C | 0.898573  | 2.140020  | 1.021427  |
| C | -0.406093 | 1.868601  | 0.594821  |
| H | 2.702979  | 1.389371  | 1.898619  |
| H | 1.196736  | 0.459759  | 2.339370  |
| F | 1.887982  | -1.550060 | 1.209370  |
| C | 2.771333  | -0.085648 | -0.506167 |
| F | 0.086382  | -0.289819 | -1.515055 |
| F | -0.361707 | -1.821109 | -0.002333 |
| H | -0.748926 | 0.086333  | 1.705382  |
| H | 1.383138  | 3.032398  | 0.640314  |
| H | -0.883926 | 2.586816  | -0.062844 |
| O | 2.679147  | 0.713481  | -1.409350 |
| O | 3.933060  | -0.603736 | -0.060306 |
| C | 5.115177  | -0.155116 | -0.749234 |
| H | 5.226895  | 0.925924  | -0.653238 |
| H | 5.063701  | -0.417723 | -1.806513 |
| H | 5.941153  | -0.671428 | -0.265566 |
| C | -4.464418 | -0.901962 | 0.591443  |
| C | -3.181522 | -0.584421 | 1.026564  |
| C | -2.378695 | 0.318467  | 0.312729  |
| C | -2.892768 | 0.874229  | -0.870124 |
| C | -4.173688 | 0.554849  | -1.306670 |
| C | -4.966532 | -0.331458 | -0.576786 |
| H | -5.070121 | -1.597168 | 1.161734  |
| H | -2.794610 | -1.036486 | 1.933676  |
| H | -2.281255 | 1.543585  | -1.463627 |
| H | -4.551893 | 0.991001  | -2.224444 |
| H | -5.963834 | -0.580662 | -0.920992 |

**Int-ExoB**

E = -991.50101391H

|   |           |           |           |
|---|-----------|-----------|-----------|
| C | -1.382553 | 1.613787  | -0.106271 |
| C | 0.692529  | -1.601453 | -0.040521 |
| C | 1.907949  | -1.238120 | 0.383788  |
| C | 1.376248  | 2.997332  | -0.107465 |
| C | -0.696612 | 2.074258  | 0.957182  |
| C | 0.493568  | 2.922843  | 0.897749  |
| C | -2.572022 | 0.757236  | -0.092635 |
| H | -1.053956 | 1.921006  | -1.096527 |
| F | 0.212292  | -1.395144 | -1.237310 |
| F | -0.163765 | -2.232309 | 0.731220  |
| F | 2.234365  | -1.542133 | 1.654716  |
| C | 2.905706  | -0.528663 | -0.444048 |
| H | 2.213077  | 3.684565  | -0.060185 |
| H | 1.303193  | 2.375923  | -0.993618 |
| H | -1.053240 | 1.845054  | 1.958199  |
| H | 0.668717  | 3.536569  | 1.779033  |

**P-EndoB**

E = -991.56731719H

|   |          |           |           |
|---|----------|-----------|-----------|
| C | 1.643092 | 2.006884  | -0.145690 |
| C | 1.650259 | 0.537914  | 0.273285  |
| C | 0.276648 | -0.107757 | -0.039365 |

|   |           |           |           |
|---|-----------|-----------|-----------|
| C | -3.078066 | 0.150989  | 1.071798  |
| C | -4.218663 | -0.640540 | 1.026432  |
| C | -4.883053 | -0.856369 | -0.182981 |
| C | -3.249557 | 0.522988  | -1.301285 |
| H | -2.572245 | 0.292077  | 2.019801  |
| H | -4.589578 | -1.098545 | 1.936735  |
| C | -4.391014 | -0.272089 | -1.347919 |
| H | -5.770713 | -1.477806 | -0.214723 |
| H | -2.871667 | 0.974181  | -2.212924 |
| H | -4.894938 | -0.435825 | -2.293953 |
| C | 5.091637  | 0.347780  | -0.468529 |
| H | 5.378053  | -0.214732 | -1.357775 |
| H | 4.761059  | 1.344896  | -0.760810 |
| H | 5.918847  | 0.406400  | 0.234364  |
| O | 4.041108  | -0.338853 | 0.240818  |
| O | 2.713990  | -0.177067 | -1.584195 |

**TS-ExoB**

E = -991.46088134H

|   |           |           |           |
|---|-----------|-----------|-----------|
| C | -1.008127 | 0.649766  | -0.790446 |
| C | 0.364662  | -0.285419 | 0.671620  |
| C | 1.679454  | 0.182363  | 0.487193  |
| C | 1.661632  | 1.543097  | -1.382658 |
| C | -0.627094 | 1.988507  | -0.695279 |
| C | 0.675813  | 2.418368  | -0.974115 |
| C | -2.348810 | 0.156048  | -0.433419 |
| H | -0.489778 | 0.032360  | -1.517345 |
| F | 0.054703  | -1.545181 | 0.361522  |
| F | -0.260466 | 0.091732  | 1.792157  |
| F | 2.045404  | 1.135495  | 1.380735  |
| C | 2.741653  | -0.663526 | -0.087103 |
| H | 2.689708  | 1.882026  | -1.447527 |
| H | 1.433079  | 0.649318  | -1.947593 |
| H | -1.312676 | 2.700380  | -0.247789 |
| H | 0.954229  | 3.425826  | -0.683020 |
| C | -3.154644 | 0.788923  | 0.527247  |
| C | -4.418498 | 0.295659  | 0.830761  |
| C | -4.902156 | -0.845507 | 0.189531  |
| C | -2.842643 | -1.000178 | -1.057795 |
| H | -2.784805 | 1.660450  | 1.054345  |
| H | -5.025313 | 0.796344  | 1.576877  |
| C | -4.107783 | -1.493539 | -0.754563 |
| H | -5.886750 | -1.229782 | 0.430608  |
| H | -2.226516 | -1.511635 | -1.789511 |
| H | -4.471748 | -2.384931 | -1.252860 |
| C | 5.053968  | -1.120261 | -0.088549 |
| H | 4.917276  | -2.178218 | 0.138025  |
| H | 5.144716  | -0.992197 | -1.168026 |

|   |          |           |           |
|---|----------|-----------|-----------|
| H | 5.931400 | -0.728911 | 0.420820  |
| O | 3.947295 | -0.350356 | 0.419805  |
| O | 2.548437 | -1.517801 | -0.923717 |

**P-ExoB**

E = -991.56504280H

|   |           |           |           |
|---|-----------|-----------|-----------|
| C | -0.622607 | 0.047132  | -0.643432 |
| C | 0.207672  | 0.127585  | 0.645883  |
| C | 1.674371  | 0.584626  | 0.445095  |
| C | 1.710735  | 1.941868  | -0.280221 |
| C | -0.361196 | 1.256515  | -1.512302 |
| C | 0.679793  | 2.072957  | -1.367356 |
| C | -2.099321 | -0.193012 | -0.356790 |
| H | -0.237138 | -0.826216 | -1.178384 |
| F | 0.209291  | -1.089741 | 1.282179  |
| F | -0.358929 | 1.017610  | 1.523337  |
| F | 2.229920  | 0.754026  | 1.706637  |
| C | 2.485237  | -0.476584 | -0.321464 |
| H | 1.546450  | 2.703092  | 0.490625  |
| H | 2.717163  | 2.115458  | -0.673400 |
| H | -1.068035 | 1.419486  | -2.319063 |
| H | 0.810618  | 2.903101  | -2.054413 |
| C | -2.962771 | 0.861355  | -0.041825 |
| C | -4.312048 | 0.622309  | 0.208000  |
| C | -4.817834 | -0.675373 | 0.146937  |
| C | -2.616419 | -1.490313 | -0.416582 |
| H | -2.577490 | 1.873056  | 0.011220  |
| H | -4.968424 | 1.450301  | 0.451766  |
| C | -3.965881 | -1.732230 | -0.166377 |
| H | -5.868551 | -0.860565 | 0.339879  |
| H | -1.957972 | -2.317078 | -0.660920 |
| H | -4.350112 | -2.744774 | -0.218710 |
| C | 4.498325  | -1.690450 | -0.405884 |
| H | 3.991979  | -2.654277 | -0.461895 |
| H | 4.742255  | -1.348639 | -1.412189 |
| H | 5.392536  | -1.759285 | 0.208190  |
| O | 3.656089  | -0.725187 | 0.260684  |
| O | 2.108393  | -0.978442 | -1.352456 |

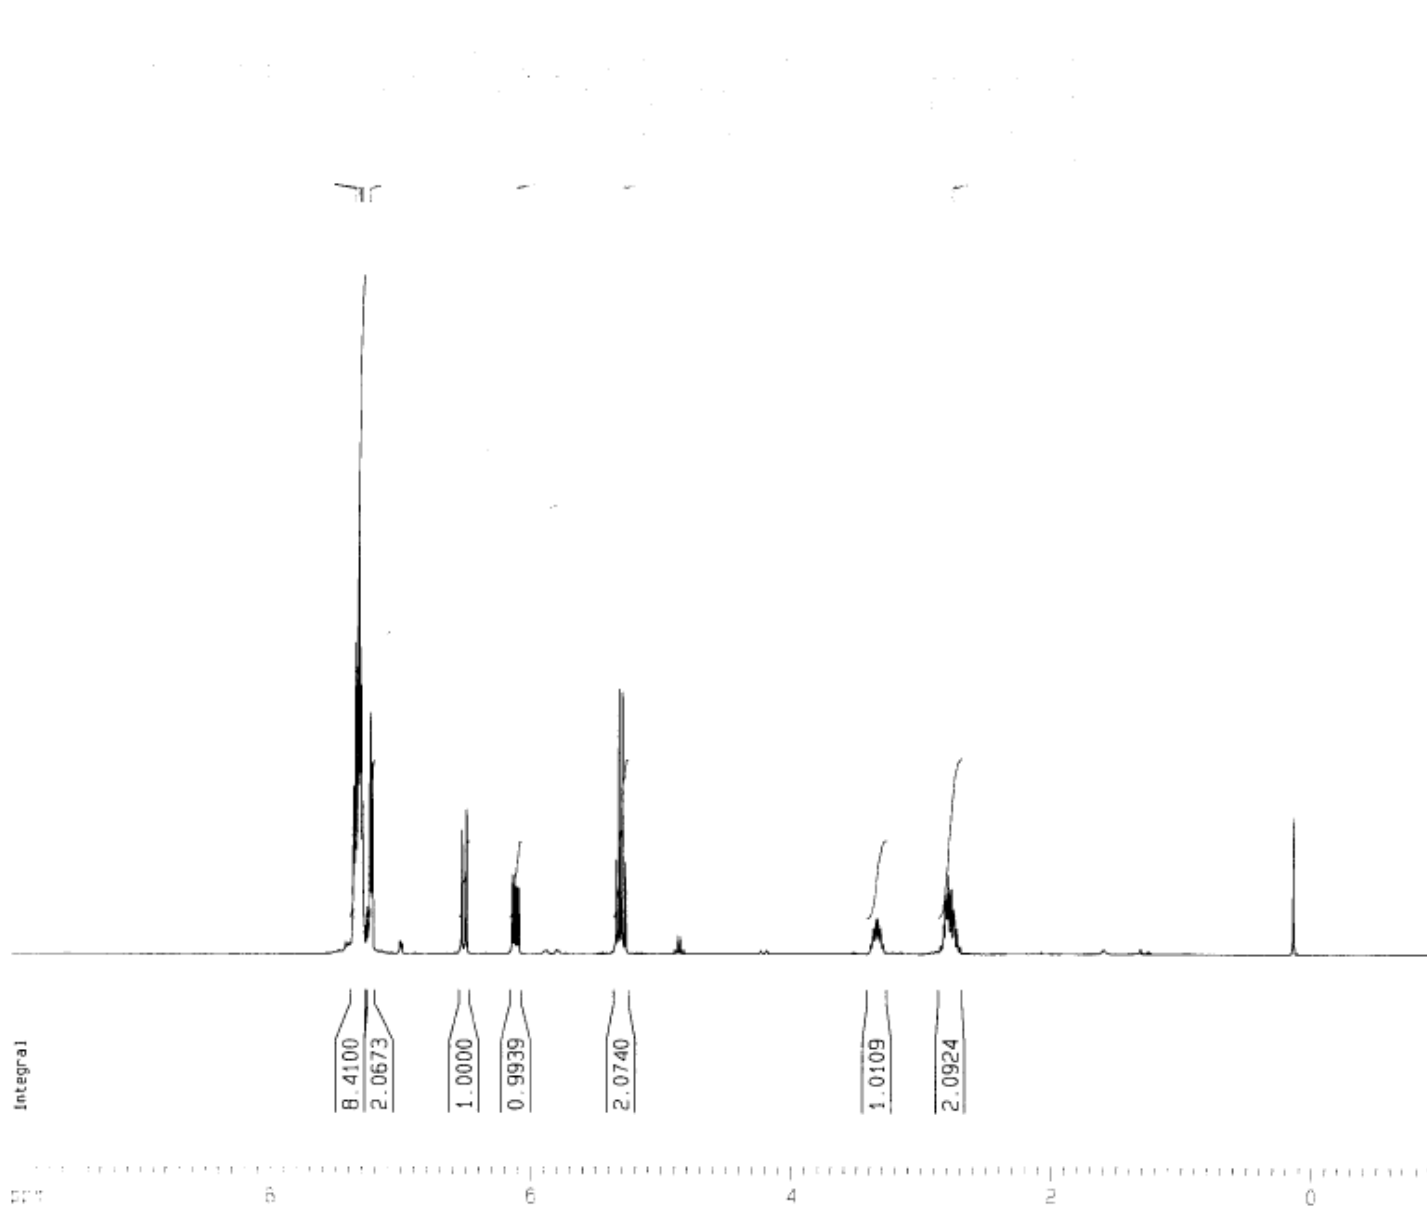

Current Data Parameters  
 NAME hondo-04.12.9  
 EXPNO 1  
 PROCNO 1

F2 - Acquisition Parameters  
 Date\_ 20041209  
 Time 9.20  
 INSTRUM drx500  
 PROBHD 5 mm Multinuc1  
 PULPROG zg30  
 TD 65536  
 SOLVENT CDCl3  
 NS 16  
 DS 2  
 SWH 10330.578 Hz  
 FIDRES 0.157632 Hz  
 AQ 3.1719923 sec  
 RG 45.3  
 DW 48.400 usec  
 DE 6.00 usec  
 TE 297.3 K  
 D1 1.00000000 sec  
 MCREST 0.00000000 sec  
 MCWAK 0.01500000 sec

===== CHANNEL f1 =====  
 NUC1 1H  
 P1 10.30 usec  
 PL1 -6.00 dB  
 SF01 500.1330885 MHz

F2 - Processing parameters  
 SI 32768  
 SF 500.1300131 MHz  
 WDW EM  
 SSB 0  
 LB 0.30 Hz  
 GB 0  
 PC 1.00

1D NMR plot parameters  
 CX 20.00 cm  
 CY 6.76 cm  
 F1P 10.000 ppm  
 F1 5001.30 Hz  
 F2P -1.000 ppm  
 F2 -500.13 Hz  
 PPHCM 0.55000 ppm/cm  
 HZCM 275.07150 Hz/cm

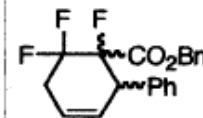

less polar

3aA

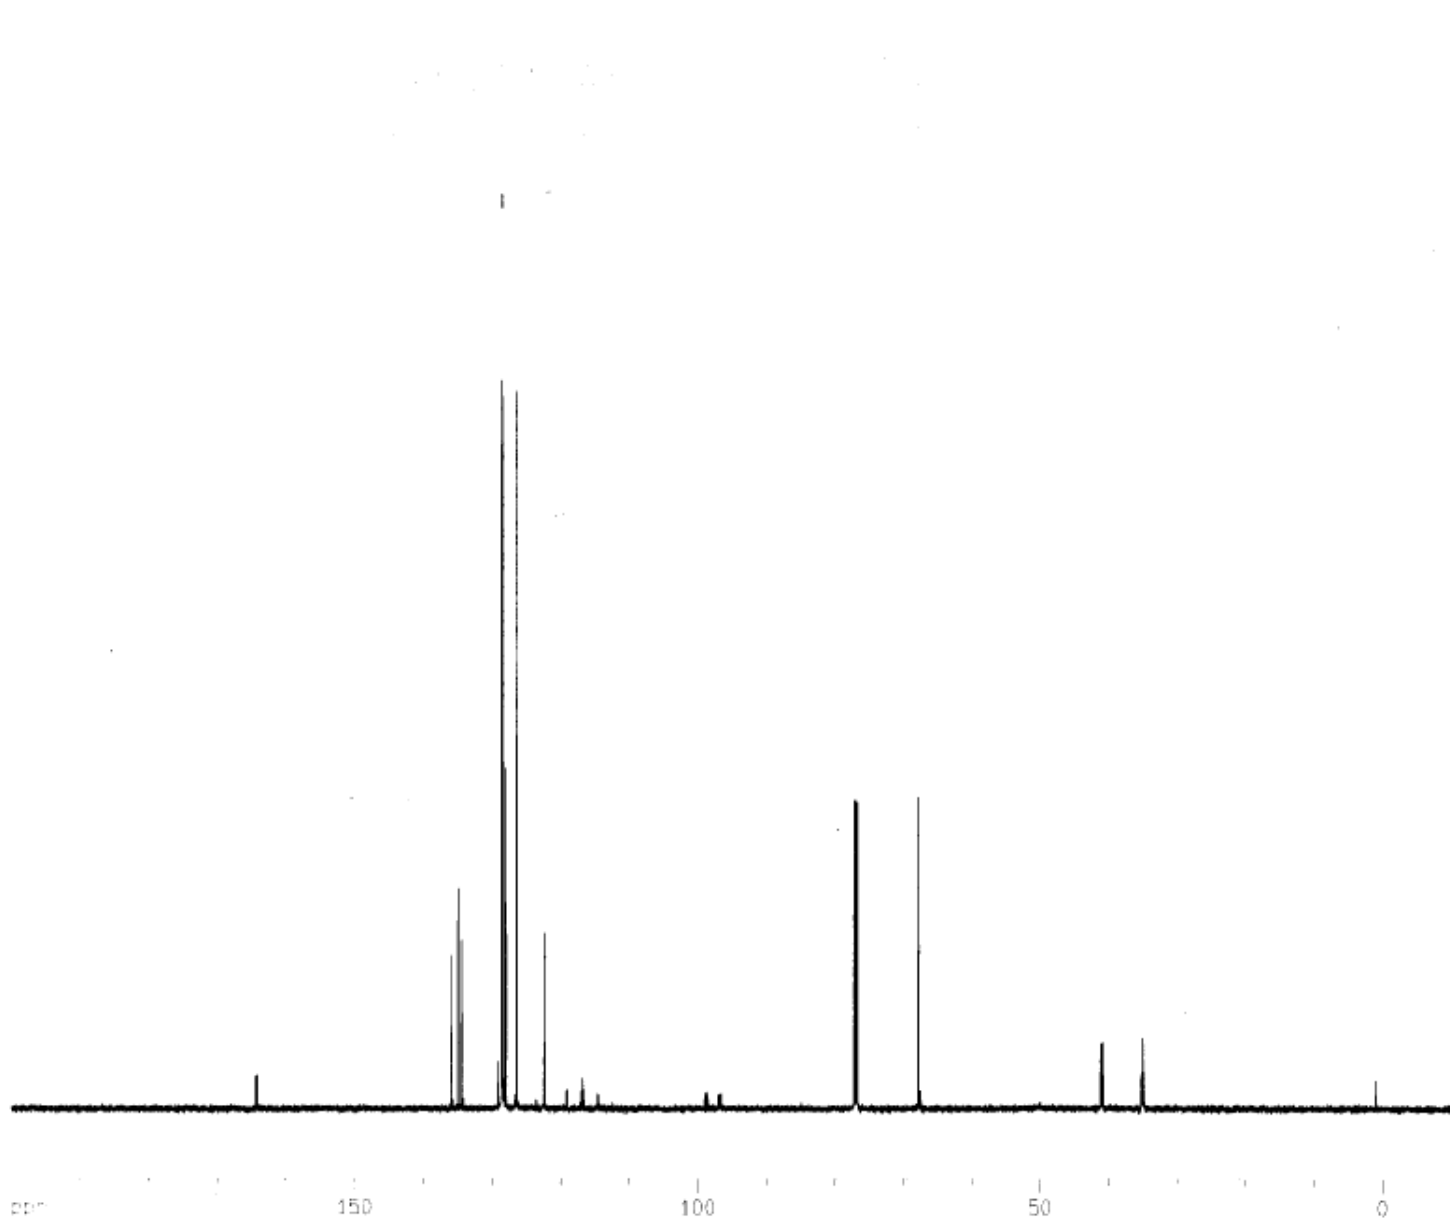

Current Data Parameters  
 NAME hondo-04.12.9  
 EXPNO 2  
 PROCNO 1

F2 - Acquisition Parameters  
 Date\_ 20041209  
 Time 9.28  
 INSTRUM drx500  
 PROBHD 5 mm Multinucl  
 PULPROG zgpg30  
 TD 65536  
 SOLVENT CDCl3  
 NS 256  
 DS 2  
 SWH 30030.029 Hz  
 FIDRES 0.458222 Hz  
 AQ 1.0912244 sec  
 RG 2048  
 DW 16.650 usec  
 DE 6.00 usec  
 TE 298.3 K  
 D1 0.5000000 sec  
 d11 0.0300000 sec  
 MCREST 0.0000000 sec  
 MCWRK 0.0150000 sec

\*\*\*\*\* CHANNEL f1 \*\*\*\*\*  
 NUC1 13C  
 P1 5.70 usec  
 PL1 -2.00 dB  
 SF01 125.7703643 MHz

\*\*\*\*\* CHANNEL f2 \*\*\*\*\*  
 CPDPRG2 waltz16  
 NUC2 1H  
 PCPD2 100.00 usec  
 PL2 -6.00 dB  
 PL12 13.74 dB  
 PL13 13.74 dB  
 SF02 500.1320005 MHz

F2 - Processing parameters  
 SI 32768  
 SF 125.7578024 MHz  
 WDW EM  
 SSB 0  
 LB 1.00 Hz  
 GB 0  
 PC 0.10

1D NMR plot parameters  
 CX 20.00 cm  
 CY 10.28 cm  
 F1P 200.000 ppm  
 F1 25151.56 Hz  
 F2P -10.000 ppm  
 F2 -1257.58 Hz  
 PPMCM 10.50000 ppm/cm  
 HZCM 1320.45691 Hz/cm

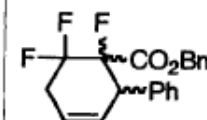

less polar  
**3aA**



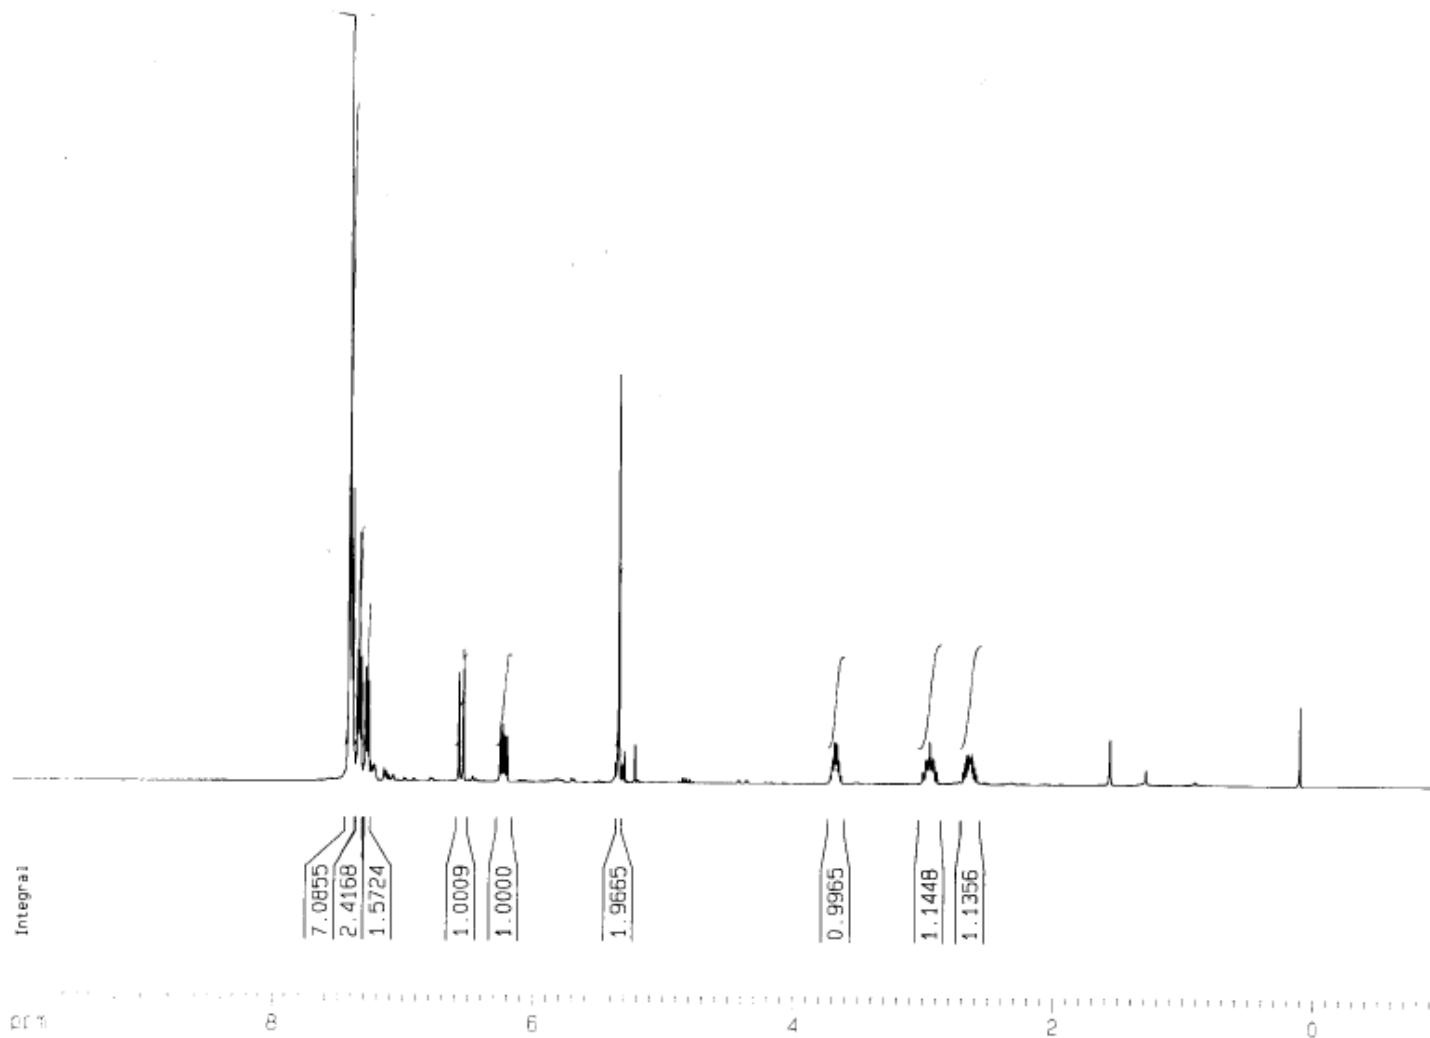

Current Data Parameters  
 NAME hondo-04.11.25  
 EXPNO 1  
 PROCNO 1

F2 - Acquisition Parameters  
 Date\_ 20041125  
 Time 11.28  
 INSTRUM drx500  
 PROBHD 5 mm Multinuc1  
 PULPROG zg30  
 TD 65536  
 SOLVENT CDC13  
 NS 16  
 DS 2  
 SWH 10330.578 Hz  
 FIDRES 0.157632 Hz  
 AQ 3.1719923 sec  
 RG 128  
 DW 48.400 usec  
 DE 6.00 usec  
 TE 297.8 K  
 D1 1.00000000 sec  
 MCREST 0.00000000 sec  
 MCWRK 0.01500000 sec

===== CHANNEL f1 =====  
 NUC1 1H  
 P1 10.30 usec  
 PL1 -6.00 dB  
 SFO1 500.1330885 MHz

F2 - Processing parameters  
 SI 32768  
 SF 500.1300115 MHz  
 WDW EM  
 SSB 0  
 LB 0.30 Hz  
 GB 0  
 PC 1.00

1D NMR plot parameters  
 CX 20.00 cm  
 CY 10.95 cm  
 F1P 10.000 ppm  
 F1 5001.30 Hz  
 F2P -1.000 ppm  
 F2 -500.13 Hz  
 PPMCM 0.55000 ppm/cm  
 HZCM 275.07150 Hz/cm

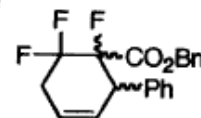

more polar  
**3aA**

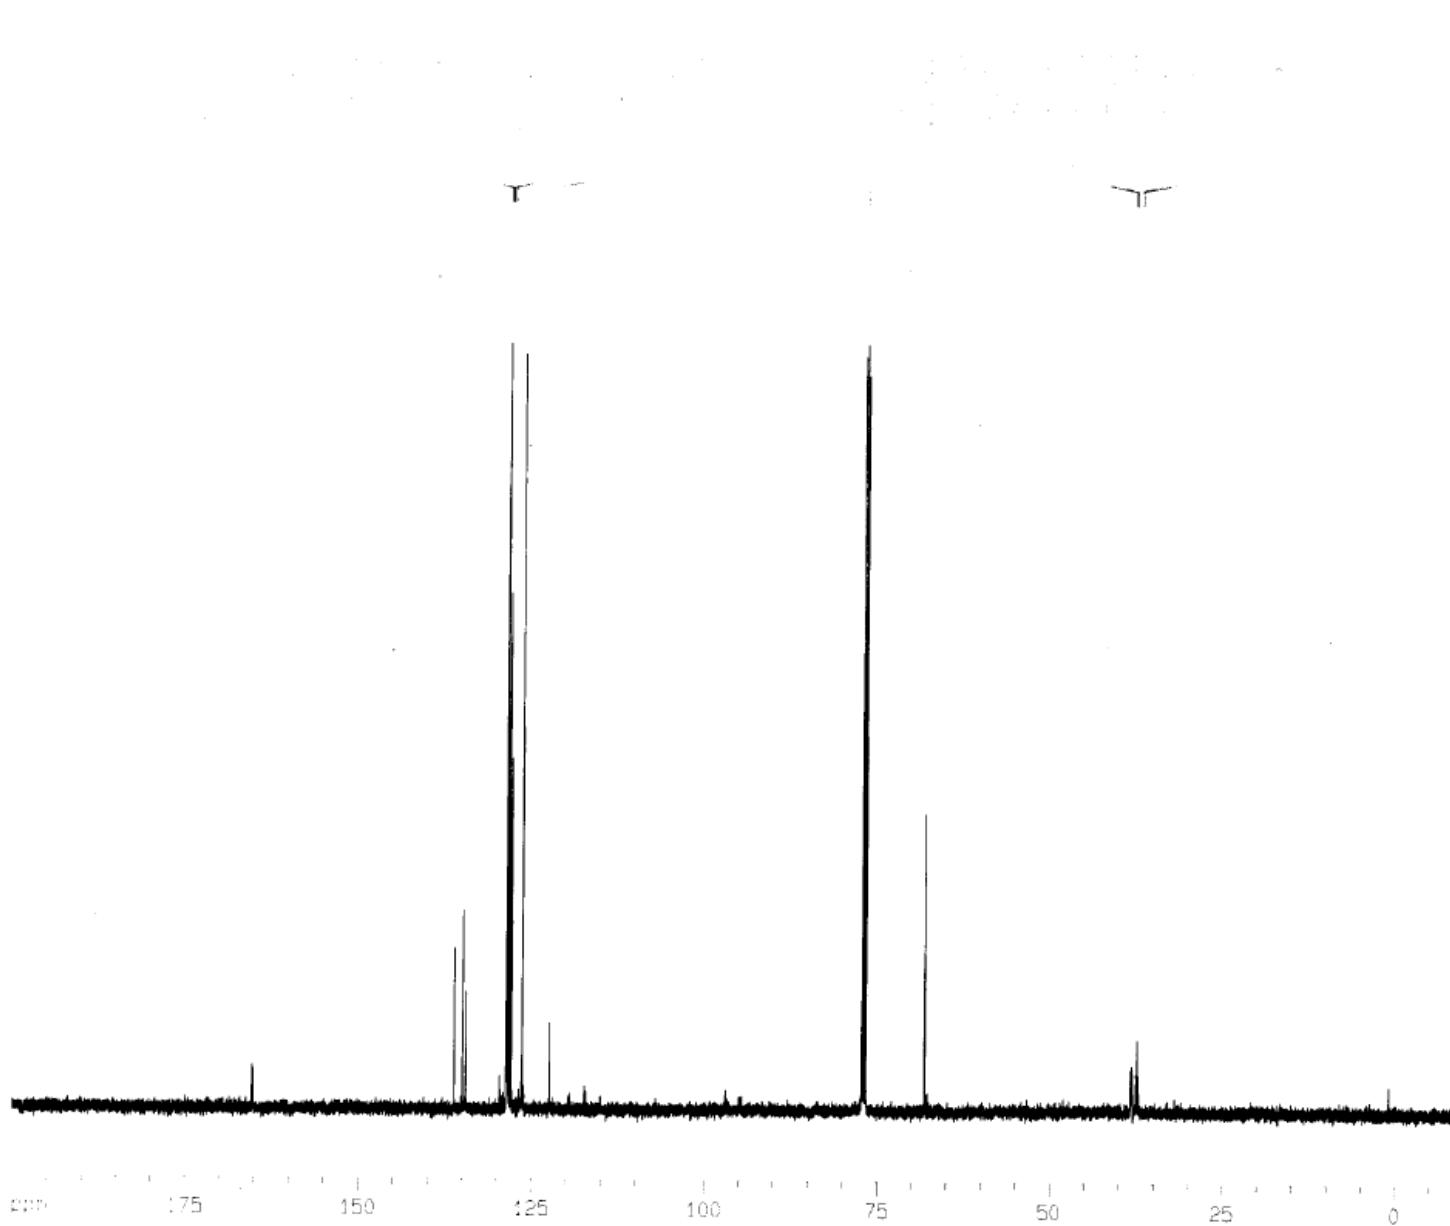

```

Current Data Parameters
NAME      hondo-04.11.25
EXPNO     2
PROCNO    1

F2 - Acquisition Parameters
Date_     20041125
Time      11.37
INSTRUM   drx500
PROBHD    5 mm Multinucl
PULPROG   zgpg30
TD         65536
SOLVENT   CDCl3
NS         256
DS         2
SWH        30030.029 Hz
FIDRES     0.458222 Hz
AQ         1.0912244 sec
RG         3649.1
DW         16.650 usec
DE         6.00 usec
TE         298.5 K
D1         0.50000000 sec
d11        0.03000000 sec
MCREST    0.00000000 sec
MCRWK     0.01500000 sec

===== CHANNEL f1 =====
NUC1       13C
P1         5.70 usec
PL1        -2.00 dB
SF01       125.7703643 MHz

===== CHANNEL f2 =====
CPOPRG2   waltz16
NUC2       1H
PCPD2     100.00 usec
PL2        -6.00 dB
PL12       13.74 dB
PL13       13.74 dB
SF02       500.1320005 MHz

F2 - Processing parameters
SI         32768
SF         125.7577969 MHz
WDW        EM
SSB         0
LB         1.00 Hz
GB         0
PC         0.10

1D NMR plot parameters
CX         20.00 cm
CY         10.60 cm
F1P        200.000 ppm
F1         25151.56 Hz
F2P        -10.000 ppm
F2         -1257.58 Hz
PPMCM      10.50000 ppm/cm
HZCM       1320.45679 Hz/cm

```

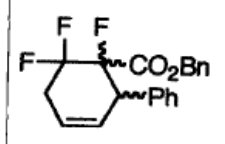

more polar  
3aA

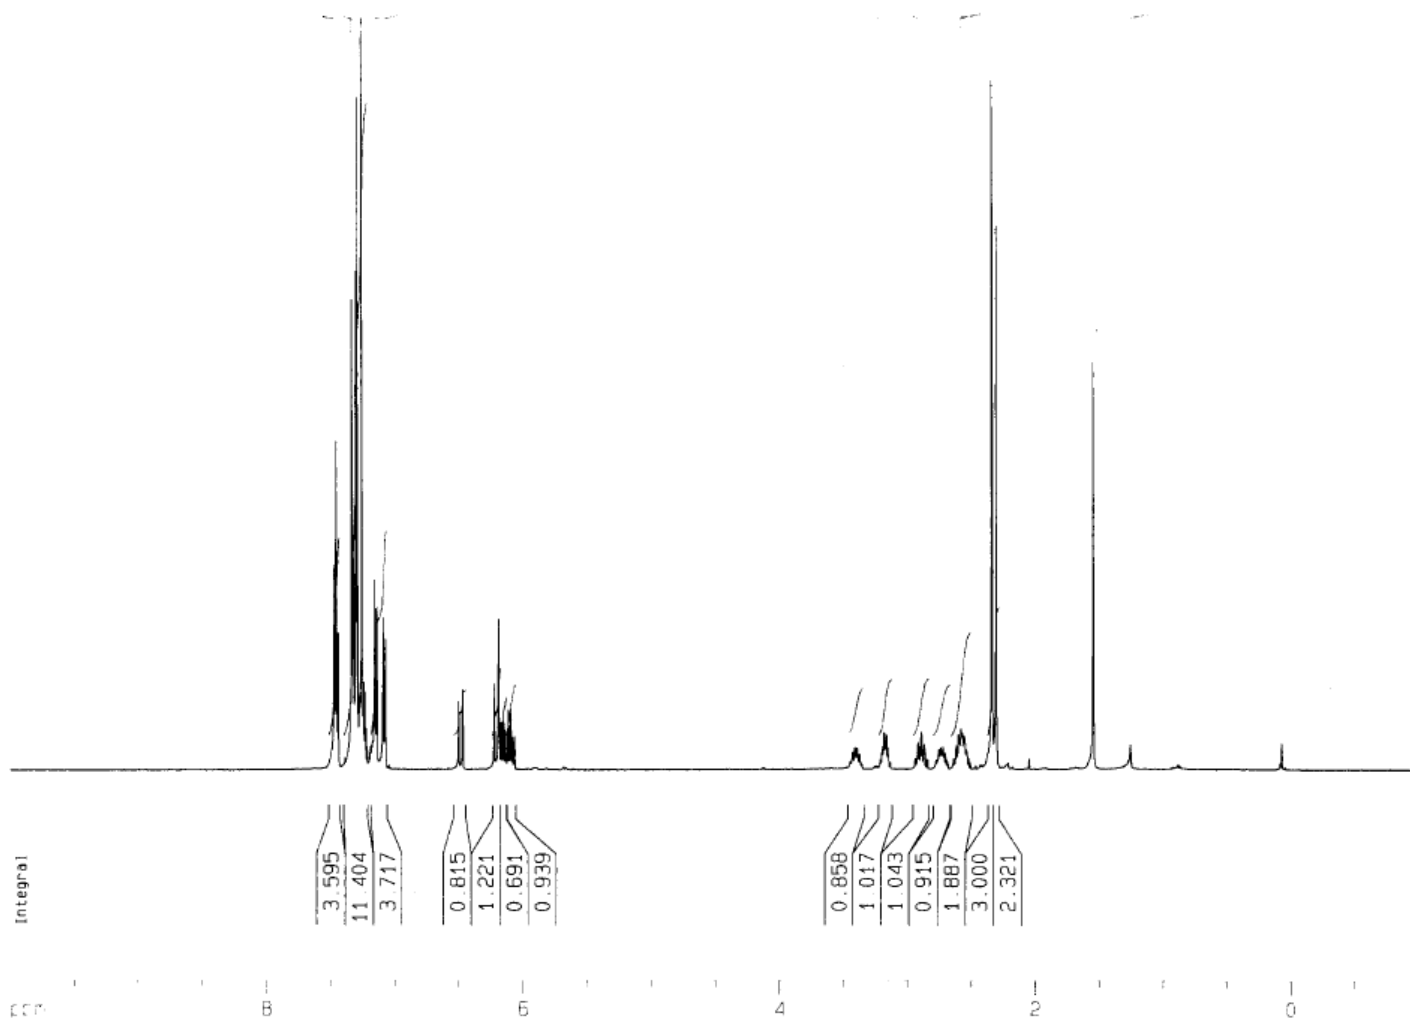

Current Data Parameters  
 NAME hondo-7-2-1  
 EXPNO 1  
 PROCNO 1

F2 - Acquisition Parameters  
 Date\_ 20070201  
 Time 12.26  
 INSTRUM drx500  
 PROBHD 5 mm Multinucl  
 PULPROG zg30  
 TD 65536  
 SOLVENT CDCl3  
 NS 16  
 DS 2  
 SWH 10330.578 Hz  
 FIDRES 0.157632 Hz  
 AQ 3.1719923 sec  
 RG 812.7  
 DW 48.400 usec  
 DE 6.00 usec  
 TE 294.2 K  
 D1 1.00000000 sec  
 MCREST 0.00000000 sec  
 MCWRK 0.01500000 sec

==== CHANNEL f1 =====  
 NUC1 1H  
 P1 10.00 usec  
 PL1 -6.00 dB  
 SFO1 500.1330885 MHz

F2 - Processing parameters  
 SI 32768  
 SF 500.1300131 MHz  
 WDW EM  
 SSB 0  
 LB 0.30 Hz  
 GB 0  
 PC 1.00

1D NMR plot parameters  
 CX 20.00 cm  
 CY 10.92 cm  
 F1P 10.000 ppm  
 F1 5001.30 Hz  
 F2P -1.000 ppm  
 F2 -500.13 Hz  
 PPMCM 0.55000 ppm/cm  
 HZCM 275.07150 Hz/cm

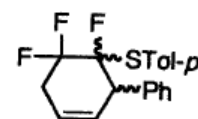

3bA

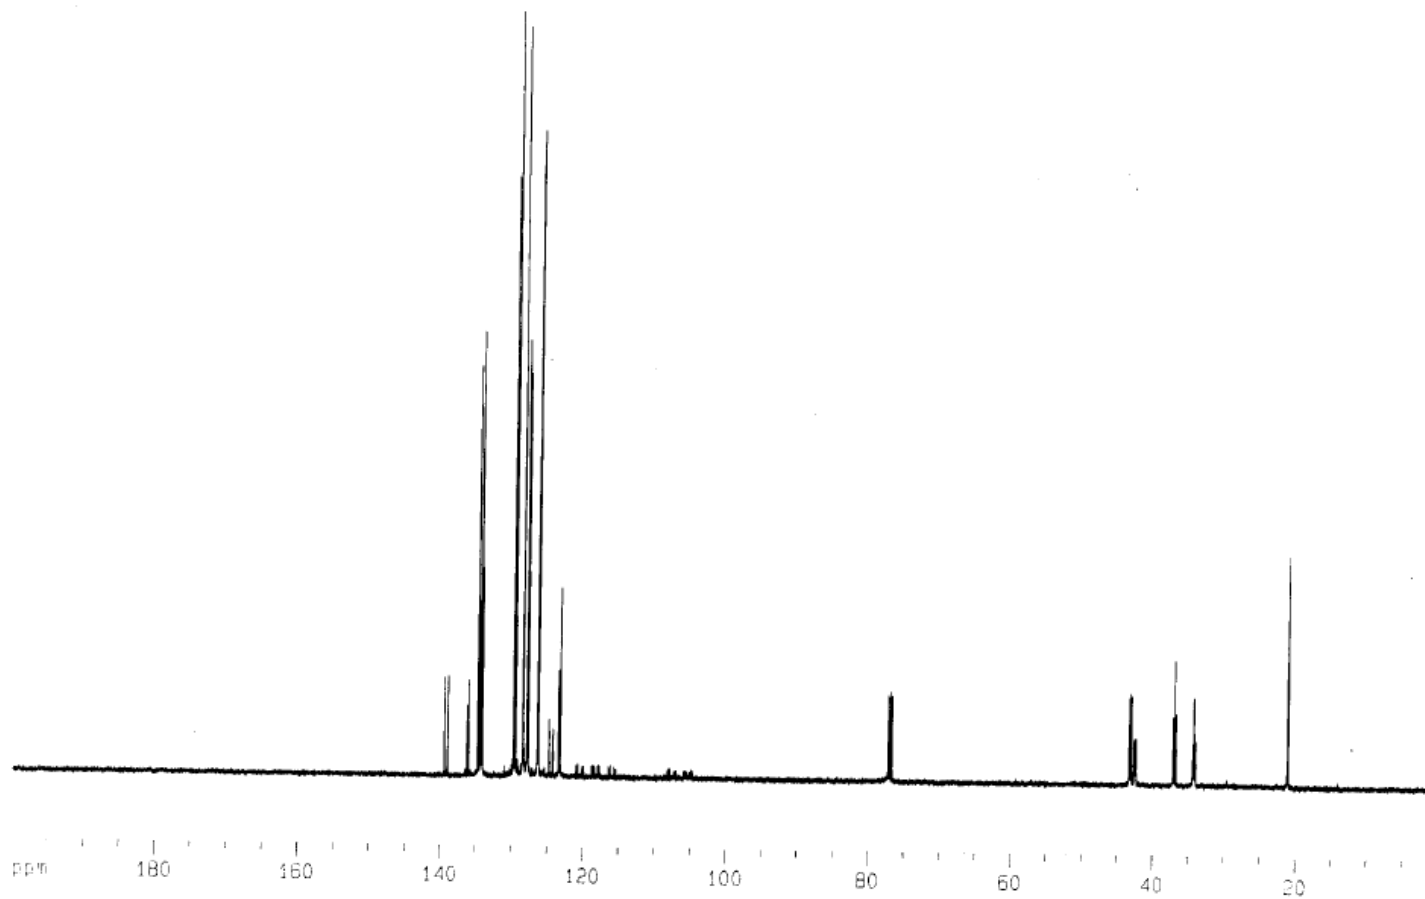

Current Data Parameters  
 NAME hondo-7-2-5  
 EXPNO 2  
 PROCNO 1

F2 - Acquisition Parameters  
 Date\_ 20070205  
 Time 15.35  
 INSTRUM drx500  
 PROBHD 5 mm Multinuc1  
 PULPROG zgpg30  
 TD 65536  
 SOLVENT CDCl3  
 NS 256  
 OS 2  
 SWH 30030.029 Hz  
 FIDRES 0.458222 Hz  
 AQ 1.0912244 sec  
 RG 3649.1  
 DW 16.650 usec  
 DE 6.00 usec  
 TE 293.7 K  
 D1 0.50000000 sec  
 d11 0.03000000 sec  
 MCREST 0.00000000 sec  
 MCWRK 0.01500000 sec

----- CHANNEL f1 -----  
 NUC1 13C  
 P1 11.00 usec  
 PL1 -3.00 dB  
 SFO1 125.7703643 MHz

----- CHANNEL f2 -----  
 CPDPRG2 waltz16  
 NUC2 1H  
 PCPD2 100.00 usec  
 PL2 -6.00 dB  
 PL12 17.00 dB  
 PL13 19.00 dB  
 SFO2 500.1320005 MHz

F2 - Processing parameters  
 SI 32768  
 SF 125.7578079 MHz  
 WDW EM  
 SSB 0  
 LB 1.00 Hz  
 GB 0  
 PC 1.40

1D NMR plot parameters  
 CX 20.00 cm  
 CY 10.79 cm  
 F1P 199.900 ppm  
 F1 25138.98 Hz  
 F2P -0.100 ppm  
 F2 -12.58 Hz  
 PPMCM 10.00000 ppm/cm  
 HZCM 1257.57800 Hz/cm

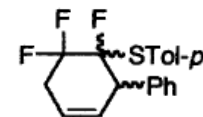

3bA

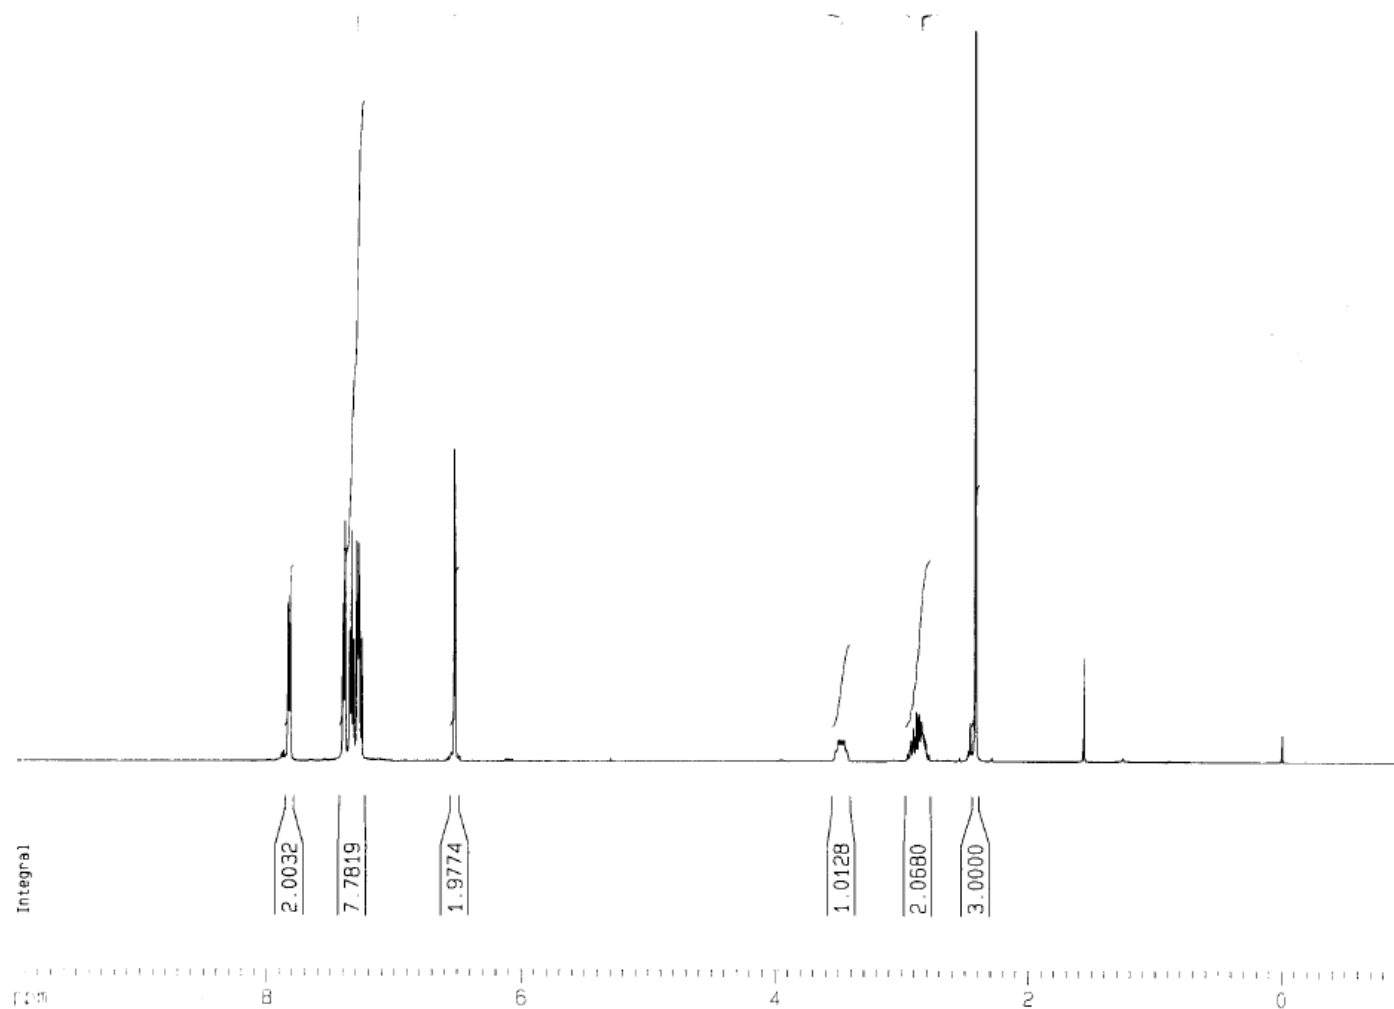

Current Data Parameters  
 NAME hondo-7-1-7  
 EXPNO 2  
 PROCNO 1

F2 - Acquisition Parameters  
 Date\_ 20070107  
 Time 20.37  
 INSTRUM drx500  
 PROBHD 5 mm Multinucl  
 PULPROG zg30  
 TD 65536  
 SOLVENT CDCl3  
 NS 16  
 DS 2  
 SWH 10330.578 Hz  
 FIDRES 0.157632 Hz  
 AQ 3.1719923 sec  
 RG 228.1  
 DW 48.400 usec  
 DE 6.00 usec  
 TE 293.1 K  
 D1 1.0000000 sec  
 MCREST 0.0000000 sec  
 MCWRK 0.0150000 sec

===== CHANNEL f1 =====  
 NUC1 1H  
 P1 10.00 usec  
 PL1 -6.00 dB  
 SFO1 500.1330885 MHz

F2 - Processing parameters  
 SI 32768  
 SF 500.1300153 MHz  
 WDW EM  
 SSB 0  
 LB 0.30 Hz  
 GB 0  
 PC 1.00

1D NMR plot parameters  
 CX 20.00 cm  
 CY 10.94 cm  
 F1P 10.000 ppm  
 F1 5001.30 Hz  
 F2P -1.000 ppm  
 F2 -500.13 Hz  
 PPMCM 0.55000 ppm/cm  
 HZCM 275.07150 Hz/cm

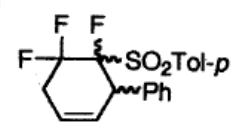

less polar  
**3dA**

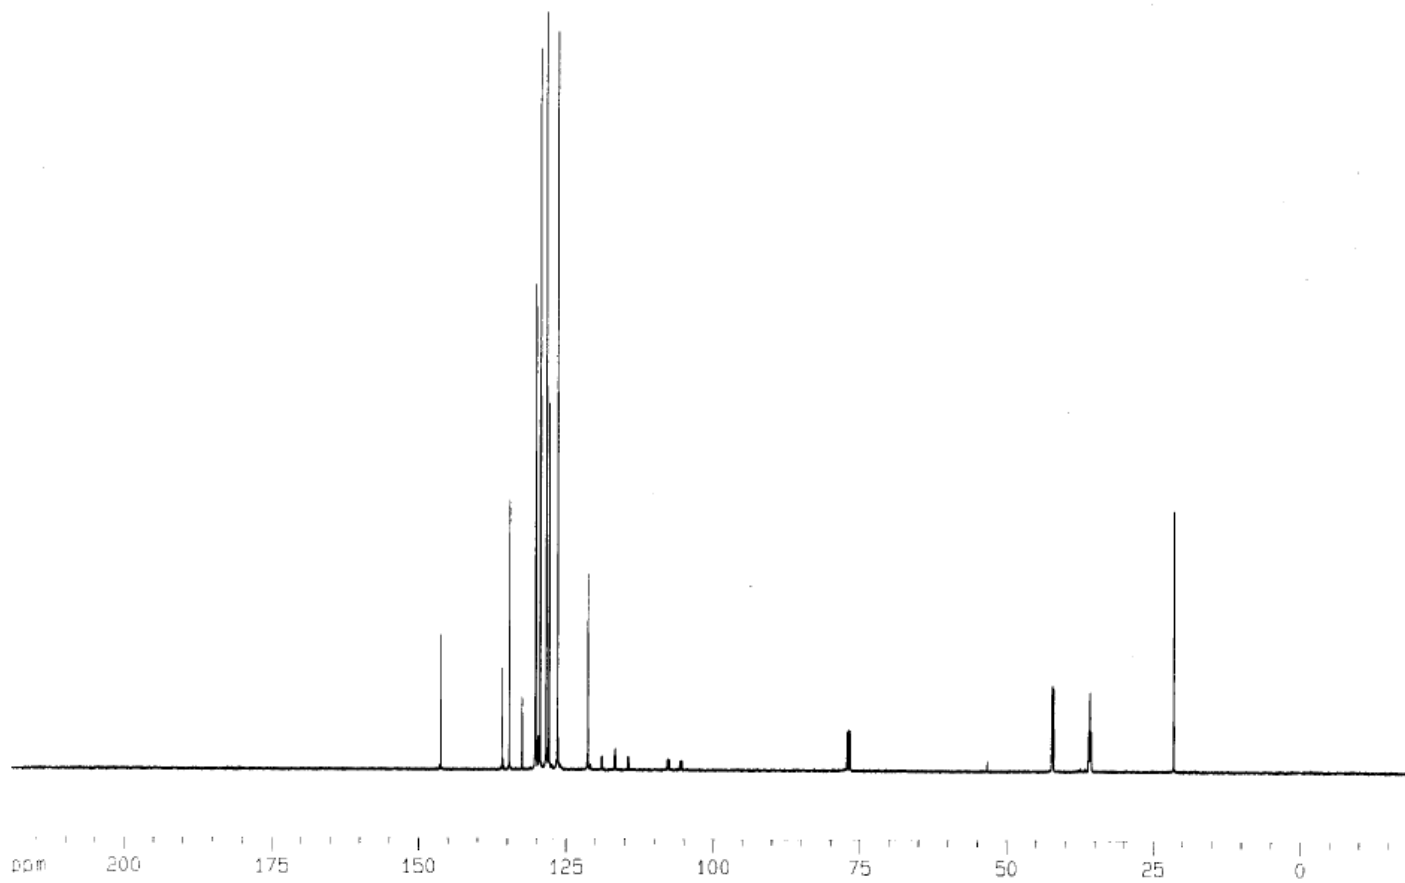

Current Data Parameters  
 NAME hondo-7-1-7  
 EXPNO 3  
 PROCNO 1

F2 - Acquisition Parameters  
 Date\_ 20070107  
 Time 20.49  
 INSTRUM drx500  
 PROBHD 5 mm Multinucl  
 PULPROG zgpg30  
 TD 65536  
 SOLVENT CDC13  
 NS 256  
 DS 2  
 SWH 30030.029 Hz  
 FIDRES 0.458222 Hz  
 AQ 1.0912244 sec  
 RG 3649.1  
 DW 16.650 usec  
 DE 6.00 usec  
 TE 293.5 K  
 D1 0.5000000 sec  
 d11 0.0300000 sec  
 MCREST 0.0000000 sec  
 MCWRK 0.0150000 sec

\*\*\*\*\* CHANNEL f1 \*\*\*\*\*  
 NUC1 13C  
 P1 11.00 usec  
 PL1 -3.00 dB  
 SFO1 125.7703643 MHz

\*\*\*\*\* CHANNEL f2 \*\*\*\*\*  
 CPDPRG2 waltz16  
 NUC2 1H  
 PCPD2 100.00 usec  
 PL2 -6.00 dB  
 PL12 17.00 dB  
 PL13 19.00 dB  
 SFO2 500.1320005 MHz

F2 - Processing parameters  
 SI 32768  
 SF 125.7578125 MHz  
 WDM EM  
 SSB 0  
 LB 1.00 Hz  
 GB 0  
 PC 1.40

1D NMR plot parameters  
 CX 20.00 cm  
 CY 10.83 cm  
 F1P 219.206 ppm  
 F1 27566.83 Hz  
 F2P -19.587 ppm  
 F2 -2463.20 Hz  
 PPMCM 11.93963 ppm/cm  
 HZCM 1501.50146 Hz/cm

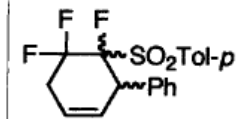

less polar  
 3dA

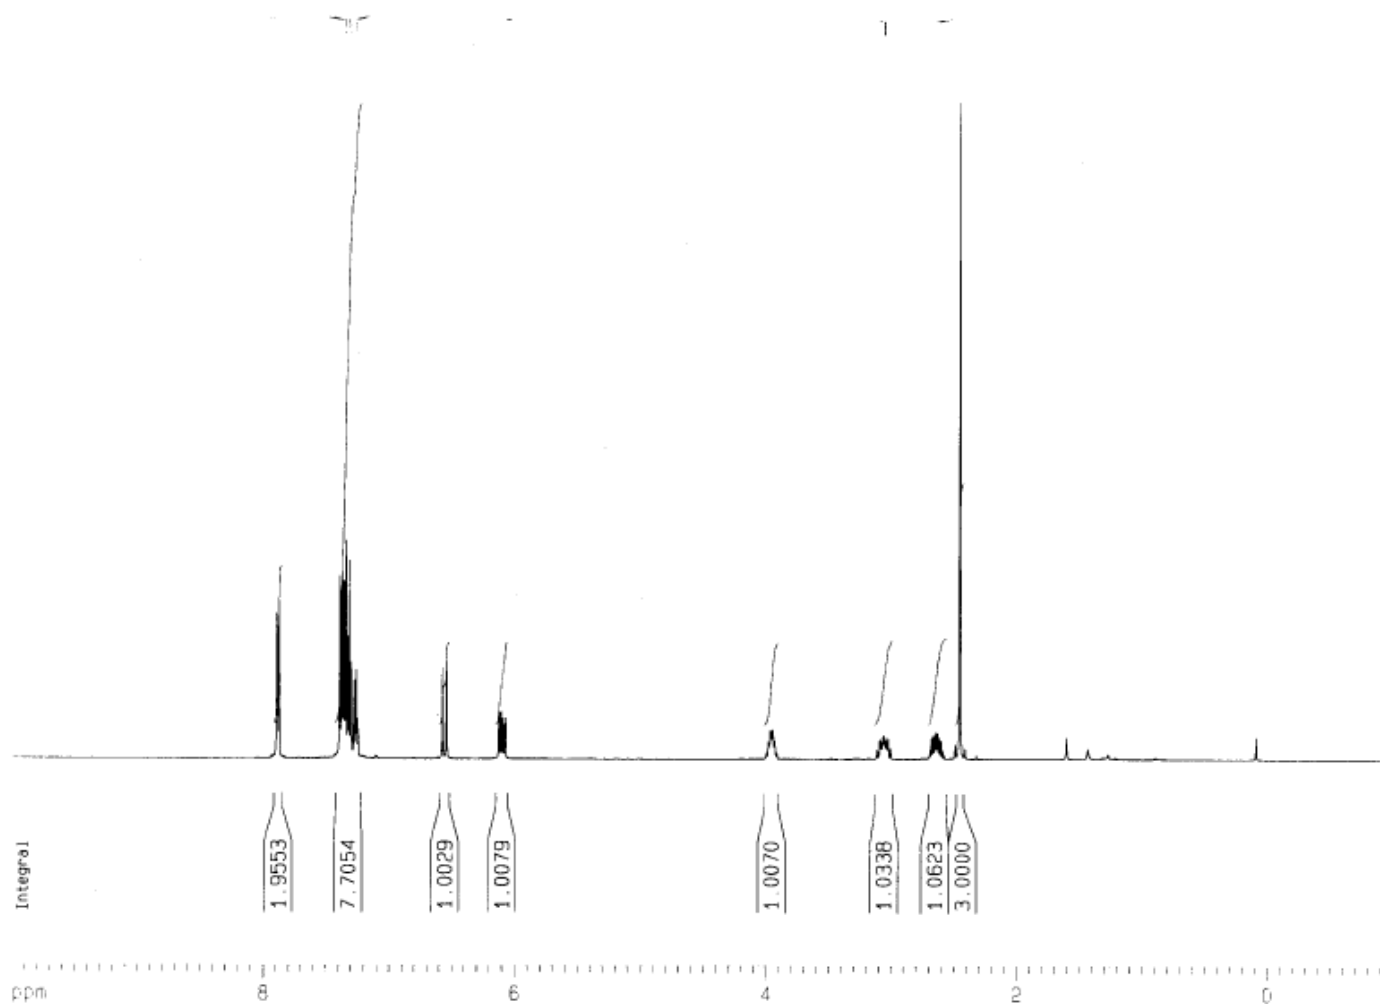

Current Data Parameters  
 NAME shimoj1-5-5-23  
 EXPNO 1  
 PROCNO 1

F2 - Acquisition Parameters  
 Date\_ 20060523  
 Time 14.47  
 INSTRUM drx500  
 PROBHD 5 mm Multinucl  
 PULPROG zg30  
 TD 65536  
 SOLVENT COC13  
 NS 16  
 DS 2  
 SWH 10330.578 Hz  
 FIDRES 0.157632 Hz  
 AQ 3.1719923 sec  
 RG 128  
 DW 48.400 usec  
 DE 6.00 usec  
 TE 298.5 K  
 D1 1.00000000 sec  
 MCREST 0.00000000 sec  
 MCWRK 0.01500000 sec

----- CHANNEL f1 -----  
 NUC1 1H  
 P1 10.00 usec  
 PL1 -6.00 dB  
 SF01 500.1330885 MHz

F2 - Processing parameters  
 SI 32768  
 SF 500.1300165 MHz  
 WDM EM  
 SSB 0  
 LB 0.30 Hz  
 GB 0  
 PC 1.00

1D NMR plot parameters  
 CX 20.00 cm  
 CY 9.68 cm  
 F1P 10.000 ppm  
 F1 5001.30 Hz  
 F2P -1.000 ppm  
 F2 -500.13 Hz  
 PPMCM 0.55000 ppm/cm  
 HZCM 275.07150 Hz/cm

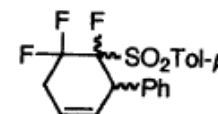

more polar  
 3dA

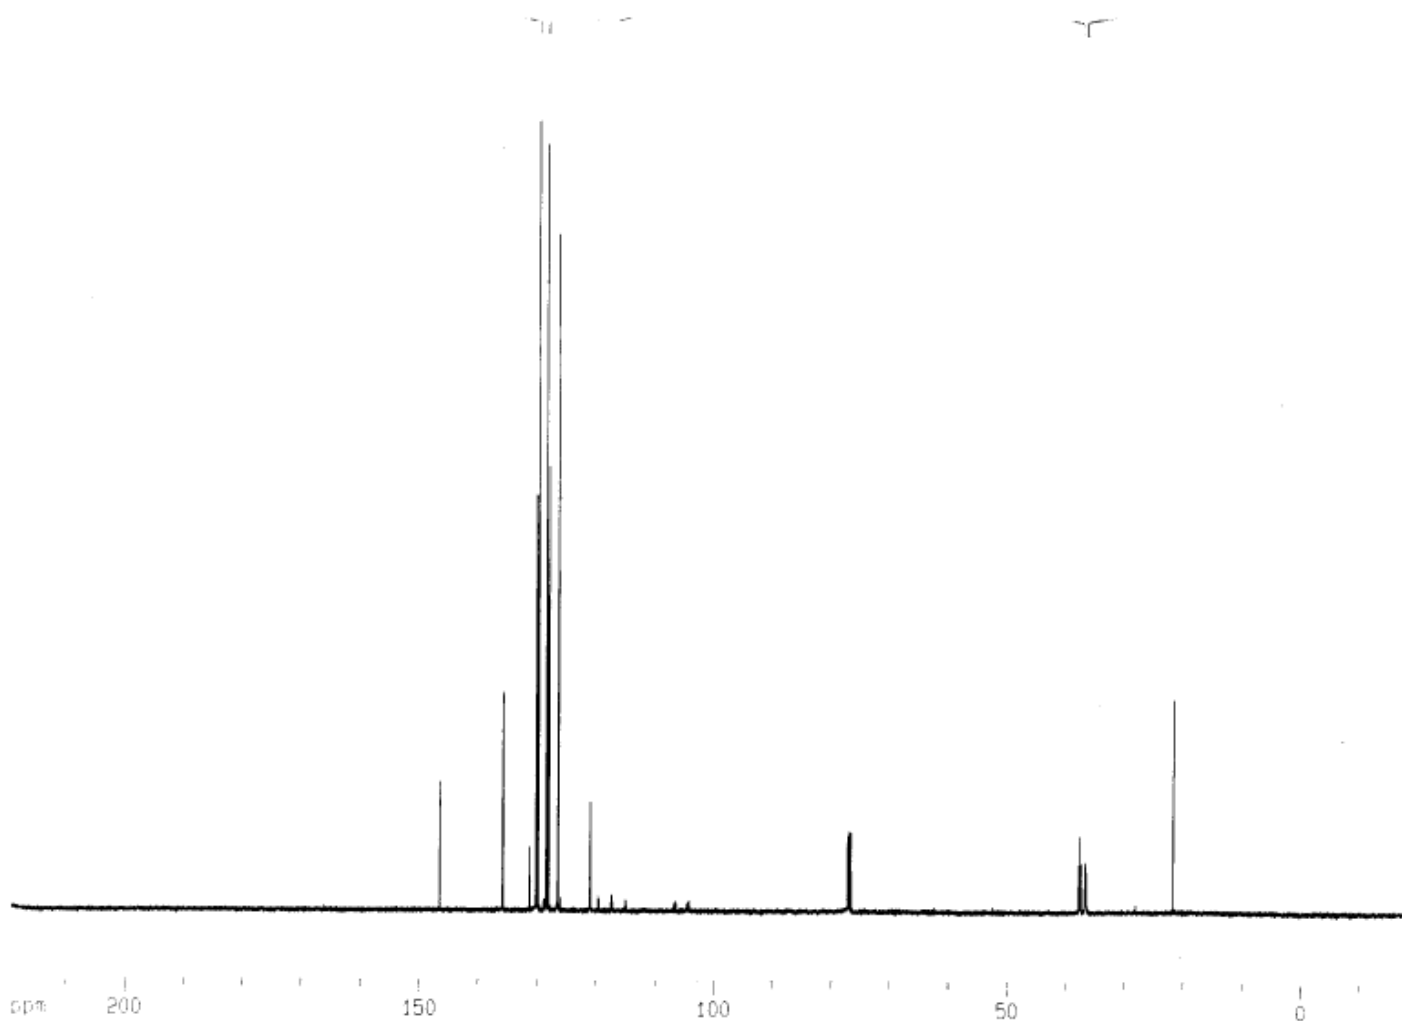

Current Data Parameters  
 NAME shinoji-6-5-23  
 EXPNO 2  
 PROCNO 1

F2 - Acquisition Parameters  
 Date\_ 20060523  
 Time 15.01  
 INSTRUM drx500  
 PROBHD 5 mm Multinucl  
 PULPROG zgpg30  
 TD 65536  
 SOLVENT CDC13  
 NS 256  
 DS 2  
 SMH 30030.029 Hz  
 FIDRES 0.458222 Hz  
 AQ 1.0912244 sec  
 RG 3649.1  
 DW 16.650 usec  
 DE 6.00 usec  
 TE 298.8 K  
 D1 0.5000000 sec  
 d11 0.0300000 sec  
 MCREST 0.0000000 sec  
 MCMRK 0.0150000 sec

\*\*\*\*\* CHANNEL f1 \*\*\*\*\*  
 NUC1 13C  
 P1 11.00 usec  
 PL1 -3.00 dB  
 SFO1 125.7703643 MHz

\*\*\*\*\* CHANNEL f2 \*\*\*\*\*  
 CPDPRG2 waltz16  
 NUC2 1H  
 PCPD2 100.00 usec  
 PL2 -6.00 dB  
 PL12 17.00 dB  
 PL13 19.00 dB  
 SFO2 500.1320005 MHz

F2 - Processing parameters  
 SI 32768  
 SF 125.7577978 MHz  
 WDM EH  
 SSB 0  
 LB 1.00 Hz  
 GB 0  
 PC 0.00

1D NMR plot parameters  
 CX 20.00 cm  
 CY 11.29 cm  
 F1P 219.322 ppm  
 F1 27581.50 Hz  
 F2P -19.470 ppm  
 F2 -2448.53 Hz  
 PPMM 11.93963 ppm/cm  
 HZCM 1501.50146 Hz/cm

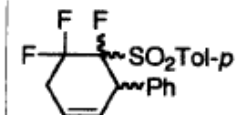

more polar

3dA



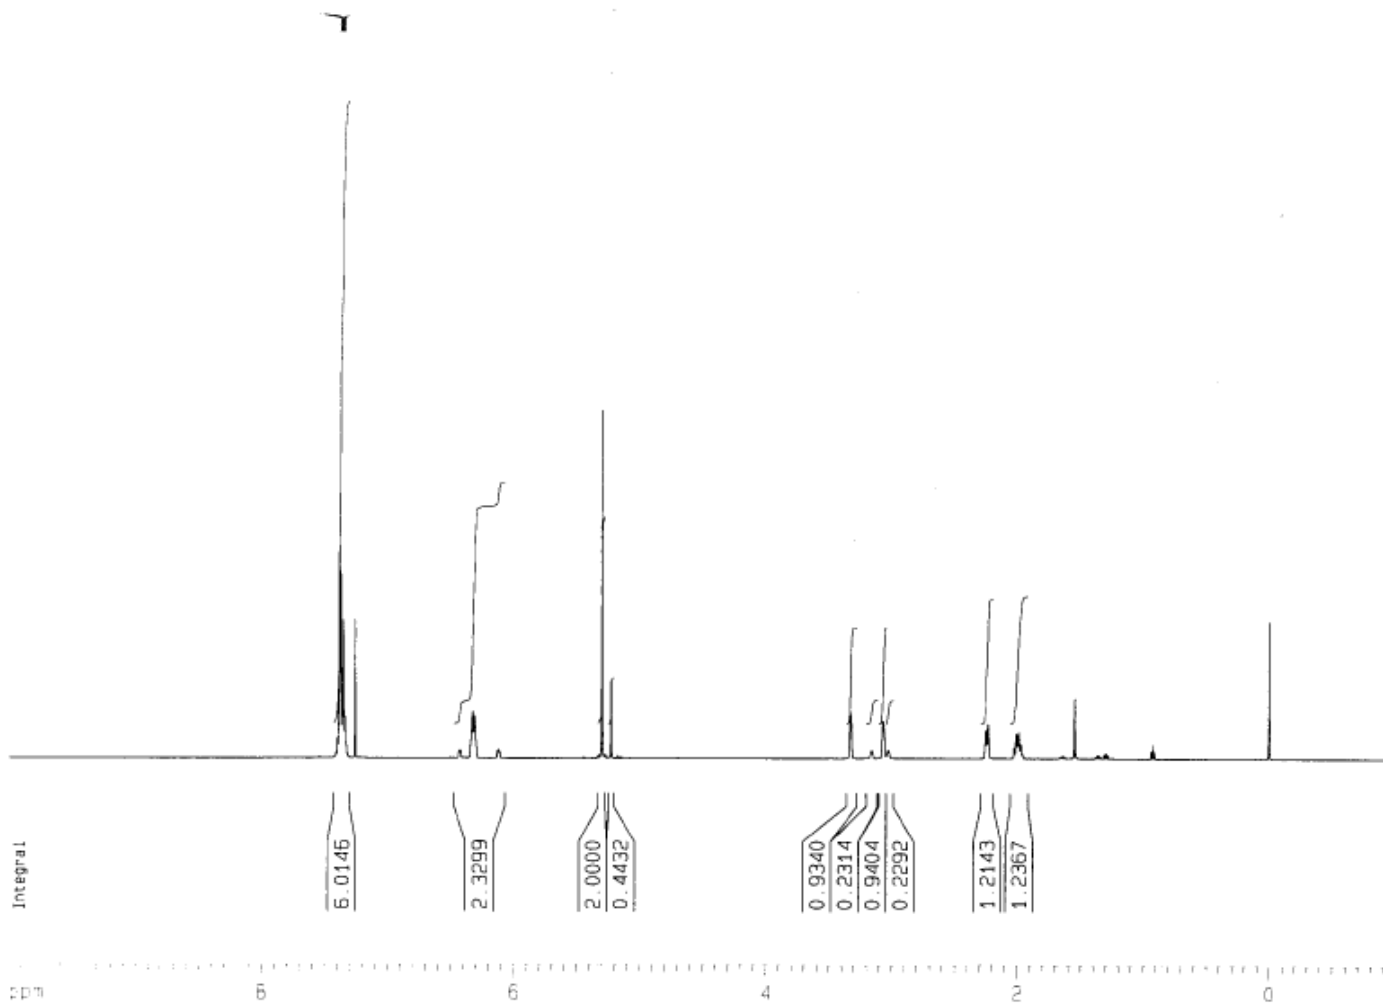

Current Data Parameters  
 NAME hondo-04.12.10  
 EXPNO 3  
 PROCNO 1

F2 - Acquisition Parameters  
 Date\_ 20041210  
 Time 16.03  
 INSTRUM drx500  
 PROBHD 5 mm Multinucl  
 PULPROG zg30  
 TD 65536  
 SOLVENT CDCl3  
 NS 16  
 DS 2  
 SWH 10330.578 Hz  
 FIDRES 0.157632 Hz  
 AQ 3.1719923 sec  
 RG 406.4  
 DW 48.400 usec  
 DE 6.00 usec  
 TE 298.0 K  
 D1 1.00000000 sec  
 MCREST 0.00000000 sec  
 MCNRK 0.01500000 sec

----- CHANNEL f1 -----  
 NUC1 1H  
 P1 10.30 usec  
 PL1 -6.00 dB  
 SF01 500.1330885 MHz

F2 - Processing parameters  
 SI 32768  
 SF 500.1300156 MHz  
 WDW EM  
 SSB 0  
 LB 0.30 Hz  
 GB 0  
 PC 1.00

1D NMR plot parameters  
 CX 20.00 cm  
 CY 5.05 cm  
 F1P 10.000 ppm  
 F1 5001.30 Hz  
 F2P -1.000 ppm  
 F2 -500.13 Hz  
 PPMCM 0.55000 ppm/cm  
 HZCM 275.07150 Hz/cm

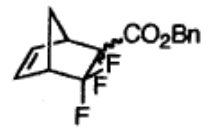

3aB

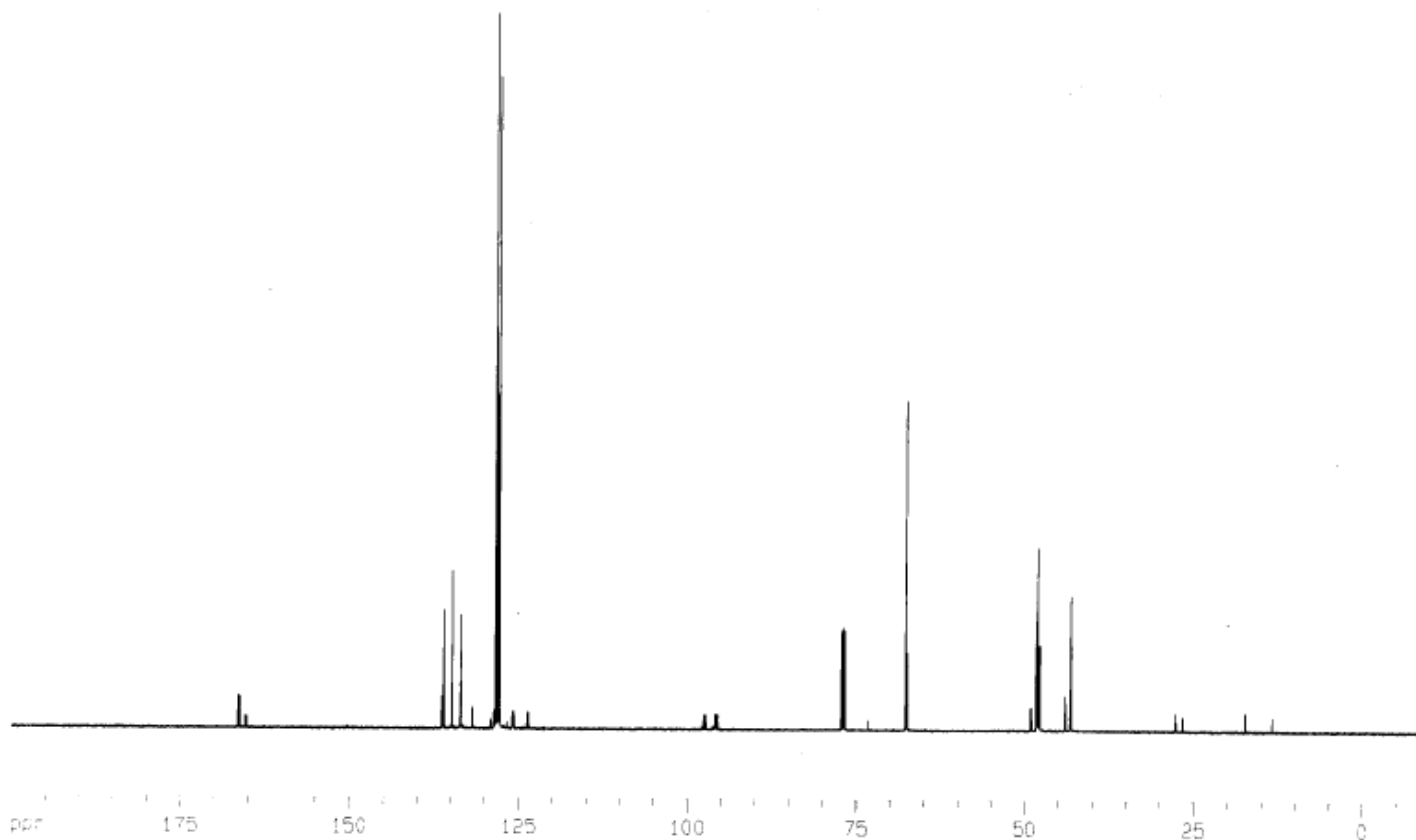

Current Data Parameters  
 NAME hondo-04.12.10  
 EXPNO 2  
 PROCNO 1

F2 - Acquisition Parameters  
 Date\_ 20041210  
 Time 12.43  
 INSTRUM drx500  
 PROBHD 5 mm Multinuc1  
 PULPROG zgpg30  
 TD 65536  
 SOLVENT CDCl3  
 NS 256  
 DS 2  
 SWH 30030.029 Hz  
 FIDRES 0.458222 Hz  
 AQ 1.0912244 sec  
 RG 4597.6  
 DW 16.650 usec  
 DE 6.00 usec  
 TE 298.4 K  
 D1 0.50000000 sec  
 d11 0.03000000 sec  
 MCREST 0.00000000 sec  
 MCMRK 0.01500000 sec

----- CHANNEL f1 -----  
 NUC1 13C  
 P1 5.70 usec  
 PL1 -2.00 dB  
 SF01 125.7703643 MHz

----- CHANNEL f2 -----  
 CPROG2 waltz16  
 NUC2 1H  
 PCPD2 100.00 usec  
 PL2 -6.00 dB  
 PL12 13.74 dB  
 PL13 13.74 dB  
 SF02 500.1320005 MHz

F2 - Processing parameters  
 SI 32768  
 SF 125.7578189 MHz  
 MDW EM  
 SSB 0  
 LB 1.00 Hz  
 GB 0  
 PC 1.40

1D NMR plot parameters  
 CX 20.00 cm  
 CY 10.31 cm  
 F1P 200.000 ppm  
 F1 25151.56 Hz  
 F2P -10.000 ppm  
 F2 -1257.58 Hz  
 PPMCM 10.50000 ppm/cm  
 HZCM 1320.45703 Hz/cm

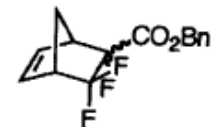

**3aB**

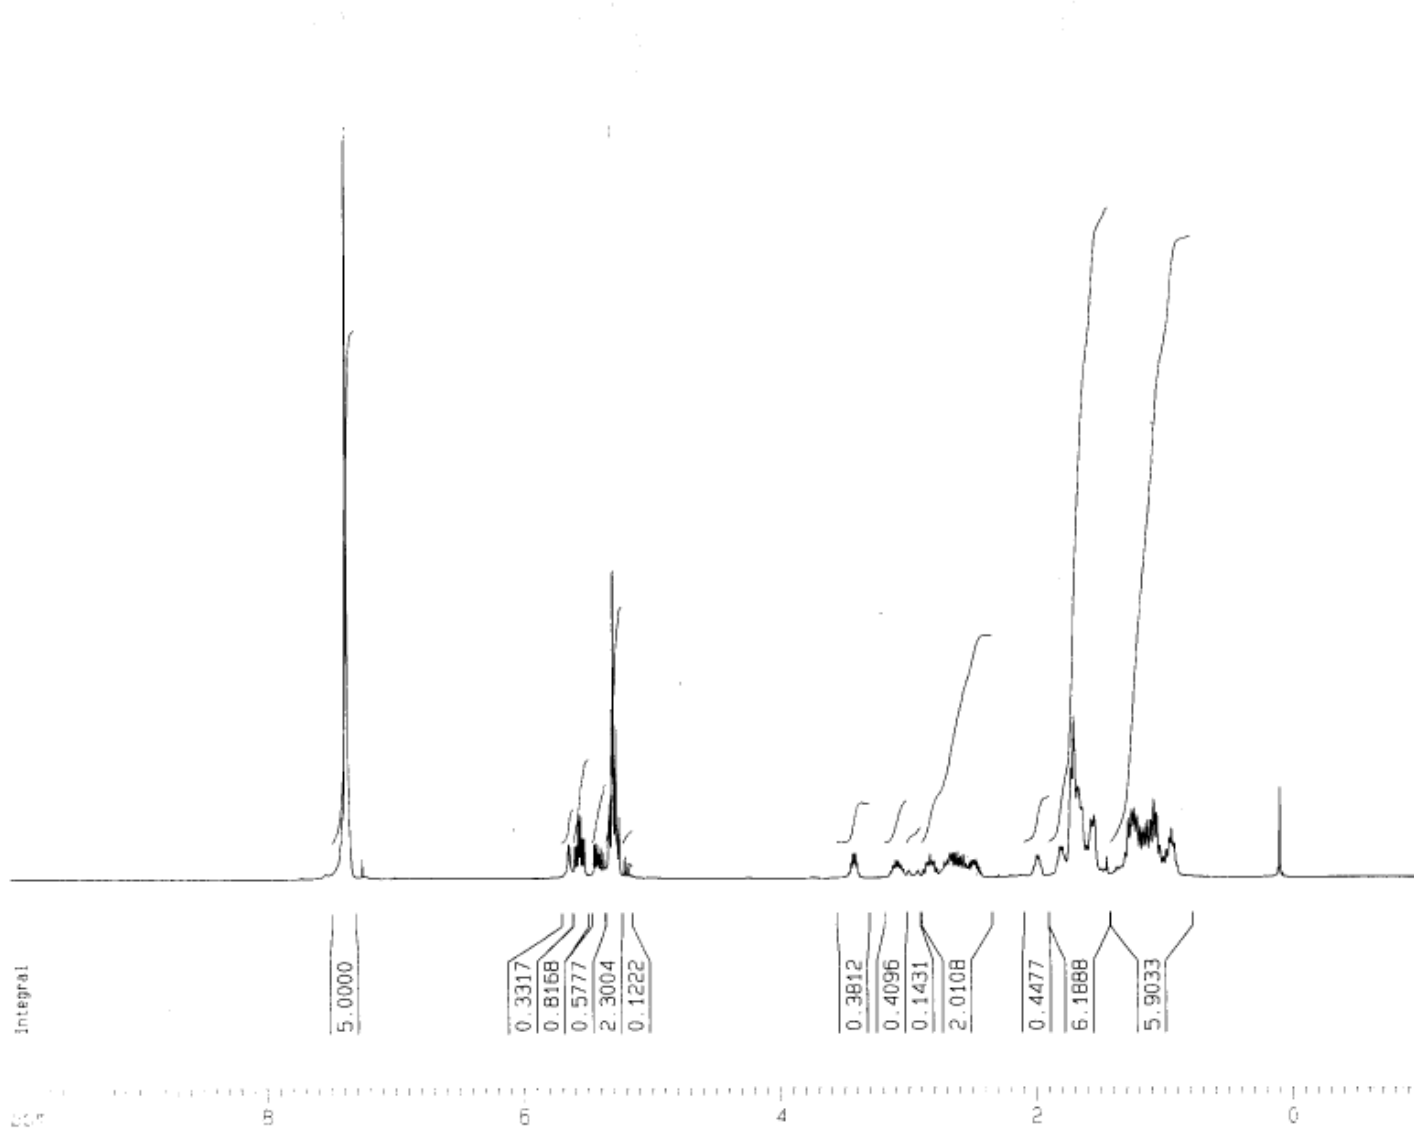

Current Data Parameters  
 NAME honda-05.2.17  
 EXPNO 1  
 PROCNO 1

F2 - Acquisition Parameters  
 Date\_ 20050217  
 Time 17.47  
 INSTRUM drx500  
 PROBHD 5 mm Multinucl  
 PULPROG zg30  
 TD 65536  
 SOLVENT CDCl3  
 NS 16  
 DS 2  
 SWH 10330.578 Hz  
 FIDRES 0.157632 Hz  
 AQ 3.1719923 sec  
 RG 35.9  
 DW 48.400 usec  
 DE 6.00 usec  
 TE 295.9 K  
 D1 1.00000000 sec  
 MCREST 0.00000000 sec  
 MCWAK 0.01500000 sec

==== CHANNEL f1 =====  
 NUC1 1H  
 P1 10.30 usec  
 PL1 -6.00 dB  
 SF01 500.1330885 MHz

F2 - Processing parameters  
 SI 32768  
 SF 500.1300131 MHz  
 WDW EM  
 SSB 0  
 LB 0.30 Hz  
 GB 0  
 PC 1.00

1D NMR plot parameters  
 CX 20.00 cm  
 CY 10.93 cm  
 F1P 10.000 ppm  
 F1 5001.30 Hz  
 F2P -1.000 ppm  
 F2 -500.13 Hz  
 PPMCM 0.55000 ppm/cm  
 HZCM 275.07150 Hz/cm

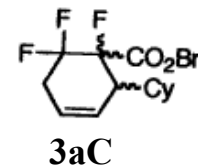

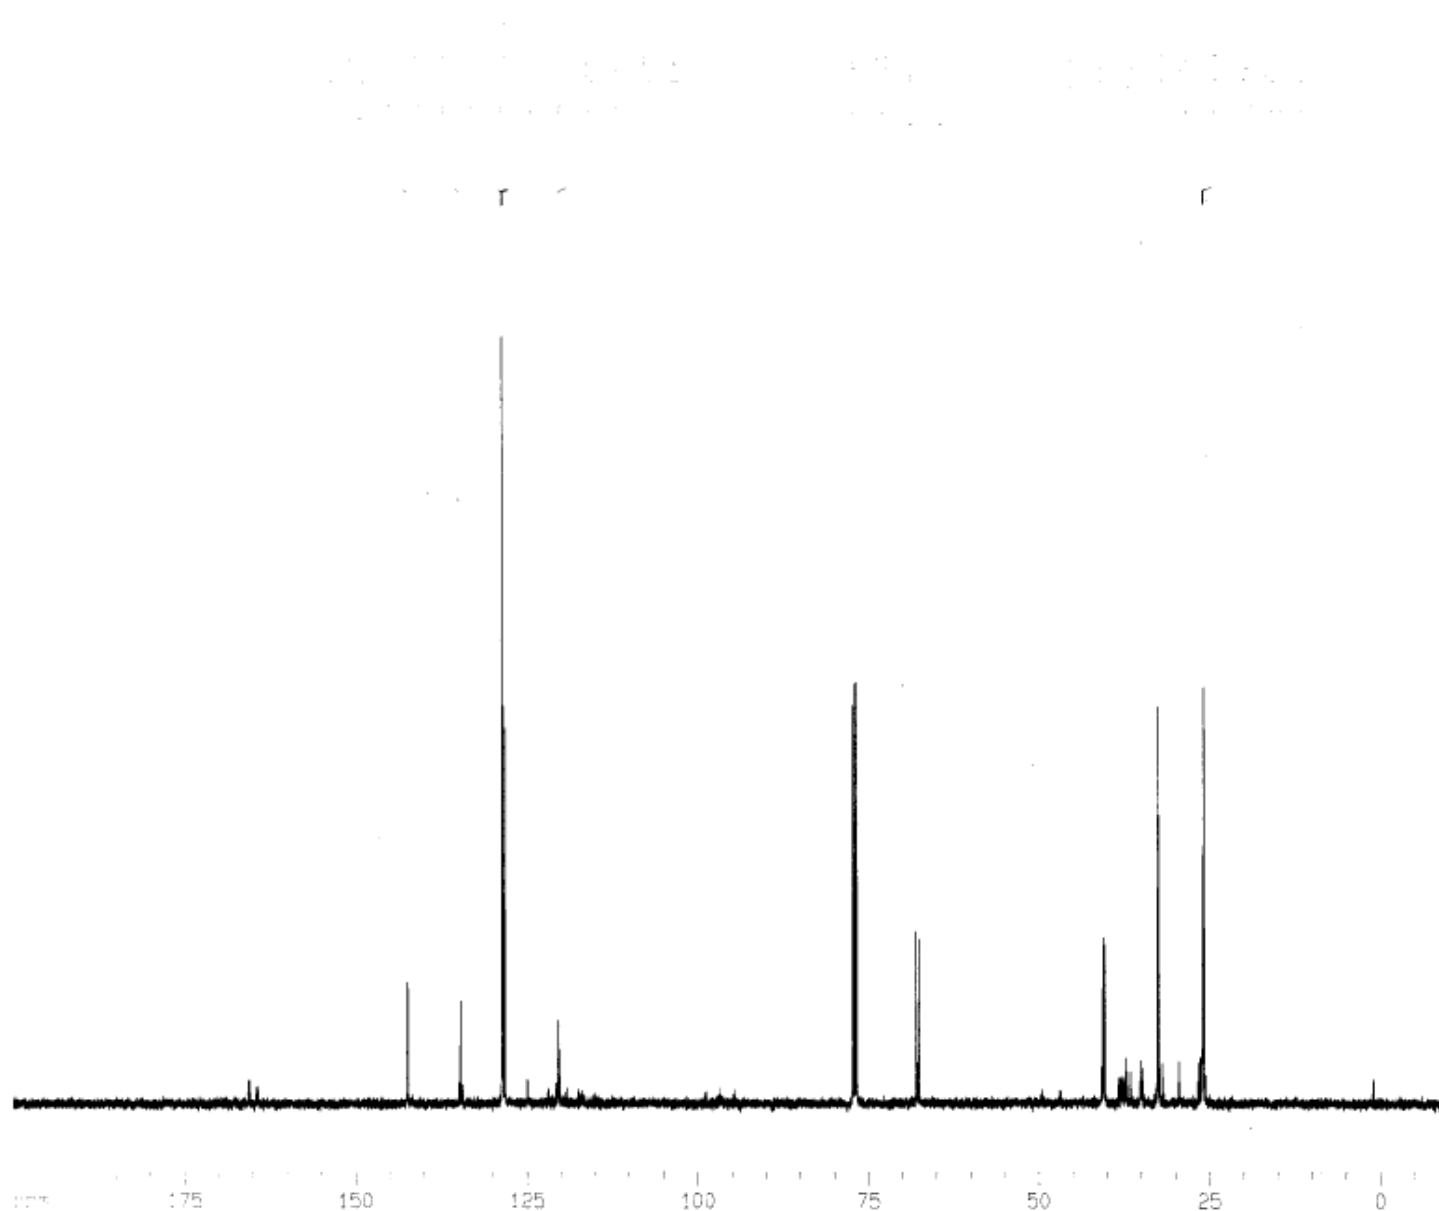

Current Data Parameters  
 NAME hondo-05.2.17  
 EXPNO 2  
 PROCNO 1

F2 - Acquisition Parameters  
 Date\_ 20050217  
 Time 17.55  
 INSTRUM drx500  
 PROBHD 5 mm Multinuc1  
 PULPRG zgpg30  
 TD 65536  
 SOLVENT CDCl3  
 NS 256  
 DS 2  
 SWH 30030.029 Hz  
 FIDRES 0.458222 Hz  
 AQ 1.0912244 sec  
 RG 3649.1  
 DM 16.650 usec  
 DE 6.00 usec  
 TE 296.9 K  
 D1 0.5000000 sec  
 d11 0.0300000 sec  
 MCREST 0.0000000 sec  
 MCWRR 0.0150000 sec

===== CHANNEL f1 =====  
 NUC1 13C  
 P1 5.70 usec  
 PL1 -2.00 dB  
 SF01 125.7703643 MHz

===== CHANNEL f2 =====  
 CPDPRG2 waltz16  
 NUC2 1H  
 PCPD2 100.00 usec  
 PL2 -6.00 dB  
 PL12 13.74 dB  
 PL13 13.74 dB  
 SF02 500.1320005 MHz

F2 - Processing parameters  
 SI 32768  
 SF 125.7577997 MHz  
 MDW EM  
 SSB 0  
 LB 1.00 Hz  
 GB 0  
 PC 1.40

1D NMR plot parameters  
 CX 20.00 cm  
 CY 10.68 cm  
 F1P 200.000 ppm  
 F1 25151.56 Hz  
 F2P -10.000 ppm  
 F2 -1257.58 Hz  
 PPMCN 10.50000 ppm/cm  
 HZCM 1320.45679 Hz/cm

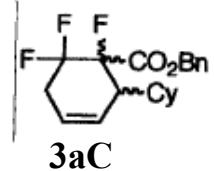

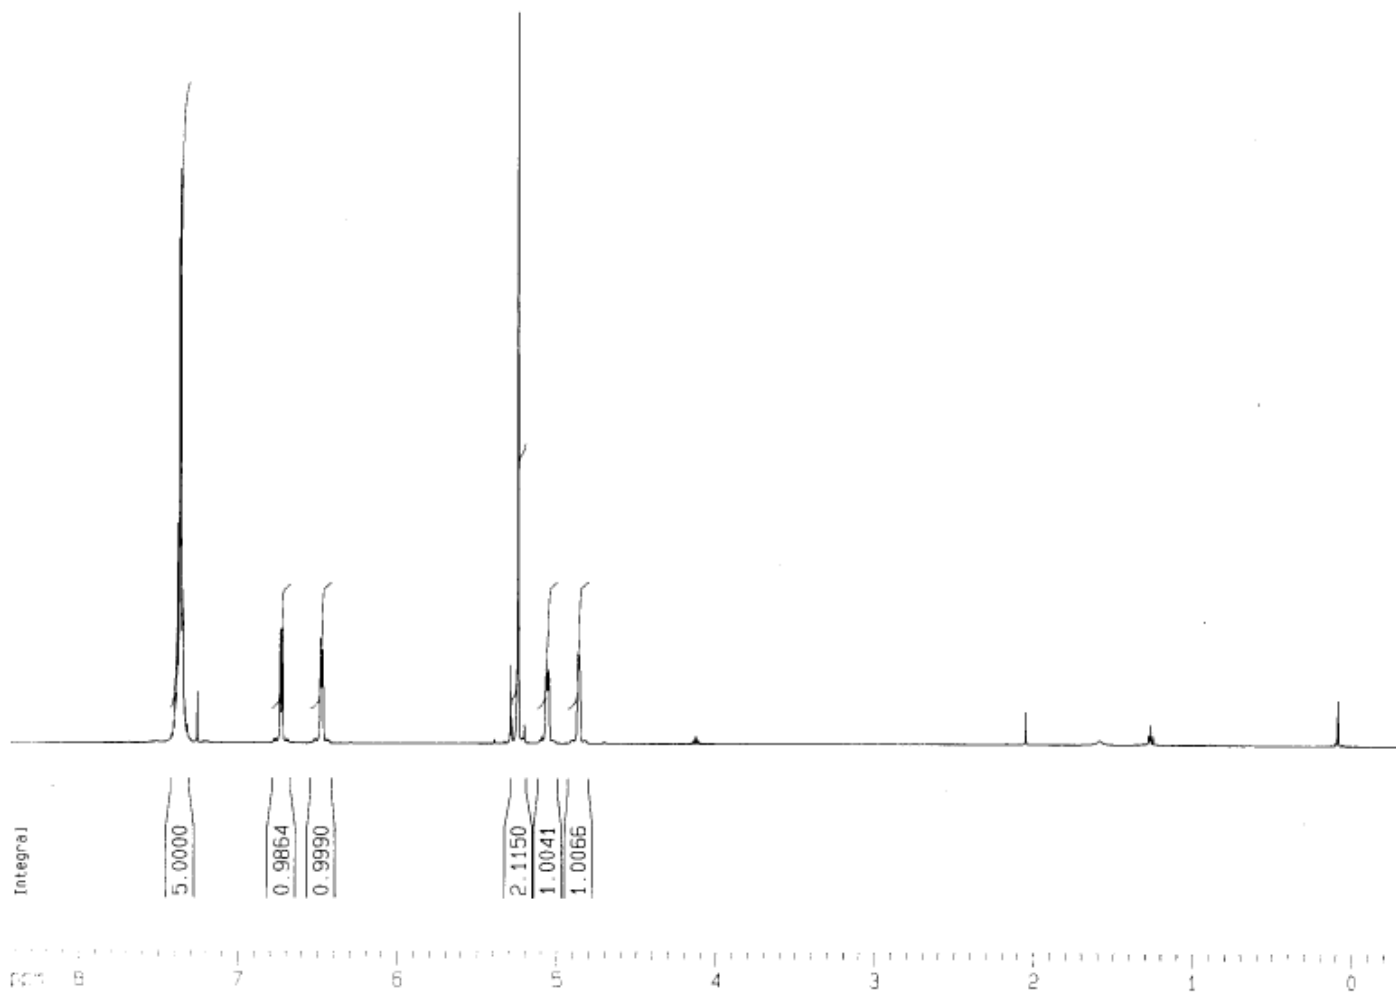

Current Data Parameters  
 NAME Hondou  
 EXPNO 3  
 PROCNO 1

F2 - Acquisition Parameters  
 Date\_ 20050213  
 Time 19.24  
 INSTRUM drx500  
 PROBHD 5 mm Multinuc1  
 PULPROG zg30  
 TD 65536  
 SOLVENT CDC13  
 NS 16  
 DS 2  
 SWH 10330.578 Hz  
 FIDRES 0.157632 Hz  
 AQ 3.1719923 sec  
 RG 128  
 DW 48.400 usec  
 DE 6.00 usec  
 TE 295.4 K  
 D1 1.00000000 sec  
 MCREST 0.00000000 sec  
 MCWRK 0.01500000 sec

===== CHANNEL f1 =====  
 NUC1 1H  
 P1 10.30 usec  
 PL1 -6.00 dB  
 SFO1 500.1330885 MHz

F2 - Processing parameters  
 SI 32768  
 SF 500.1300134 MHz  
 WDW EM  
 SSB 0  
 LB 0.30 Hz  
 GB 0  
 PC 1.00

1D NMR plot parameters  
 CX 20.00 cm  
 CY 10.78 cm  
 F1P 8.433 ppm  
 F1 4217.61 Hz  
 F2P -0.318 ppm  
 F2 -159.21 Hz  
 PPMCM 0.43757 ppm/cm  
 HZCM 218.84090 Hz/cm

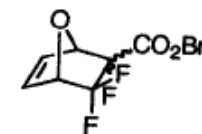

less polar

3aD

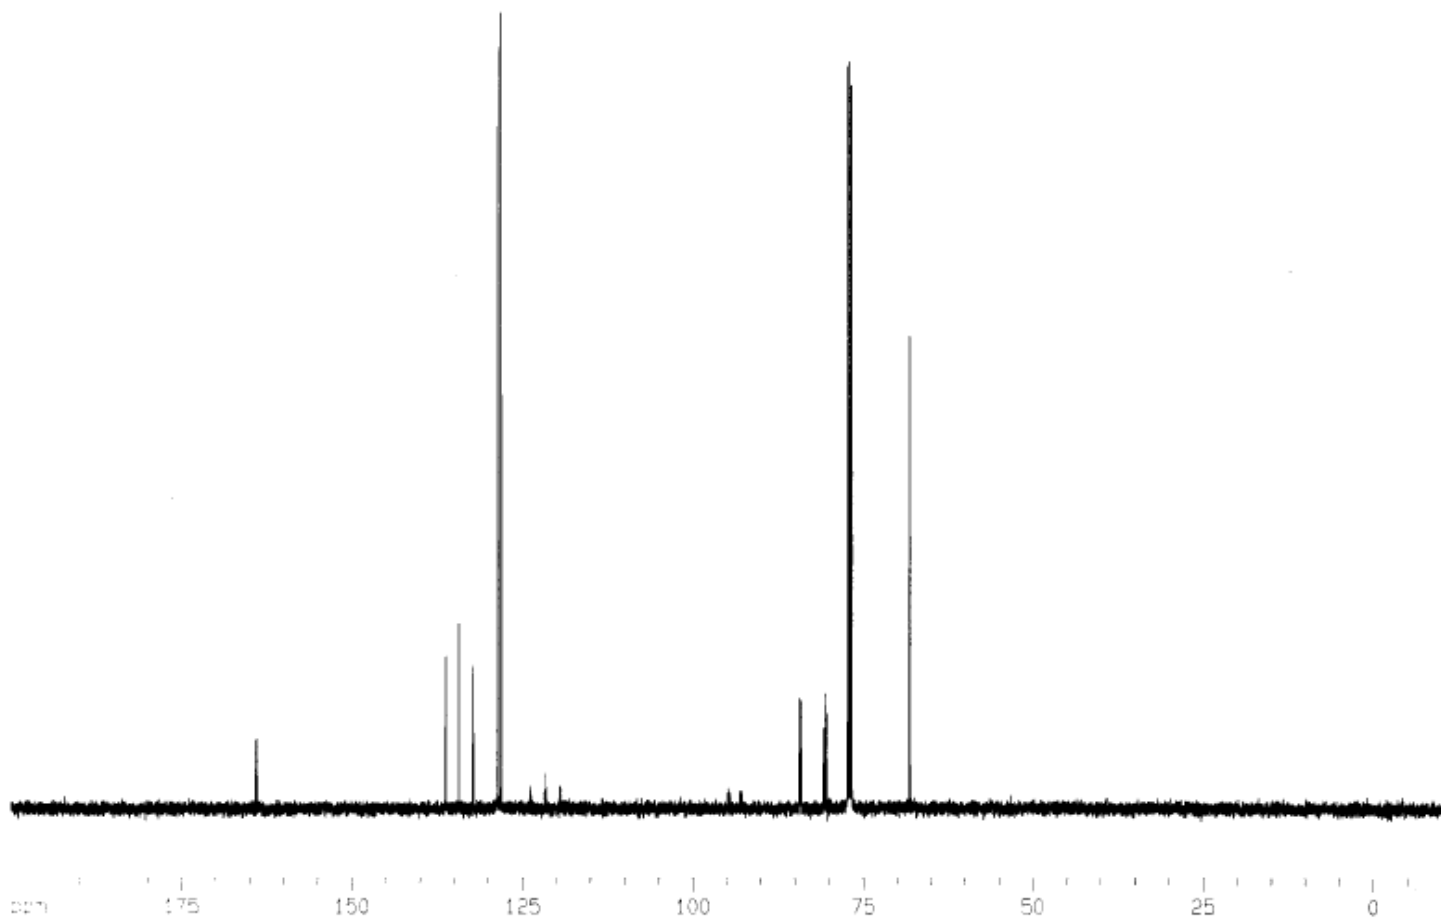

Current Data Parameters  
 NAME Hondou  
 EXPNO 4  
 PROCNO 1

F2 - Acquisition Parameters  
 Date\_ 20050213  
 Time 19.32  
 INSTRUM drx500  
 PROBHD 5 mm Multinuc1  
 PULPROG zgpg30  
 TD 65536  
 SOLVENT CDCl3  
 NS 256  
 DS 2  
 SMH 30030.029 Hz  
 FIDRES 0.458222 Hz  
 AQ 1.0912244 sec  
 RG 4597.6  
 DM 16.650 usec  
 DE 6.00 usec  
 TE 296.4 K  
 D1 0.5000000 sec  
 d11 0.0300000 sec  
 MCREST 0.0000000 sec  
 MCWRK 0.0150000 sec

----- CHANNEL f1 -----  
 NUC1 13C  
 P1 5.70 usec  
 PL1 -2.00 dB  
 SF01 125.7703643 MHz

----- CHANNEL f2 -----  
 CPDPRG2 waltz16  
 NUC2 1H  
 PCPD2 100.00 usec  
 PL2 -6.00 dB  
 PL12 13.74 dB  
 PL13 13.74 dB  
 SF02 500.1320005 MHz

F2 - Processing parameters  
 SI 32768  
 SF 125.7577969 MHz  
 WDW EM  
 SSB 0  
 LB 1.00 Hz  
 GB 0  
 PC 1.40

1D NMR plot parameters  
 CX 20.00 cm  
 CY 11.49 cm  
 F1P 200.000 ppm  
 F1 25151.56 Hz  
 F2P -10.000 ppm  
 F2 -1257.56 Hz  
 PPMM 10.50000 ppm/cm  
 HZCM 1320.45679 Hz/cm

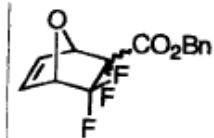

less polar  
**3aD**

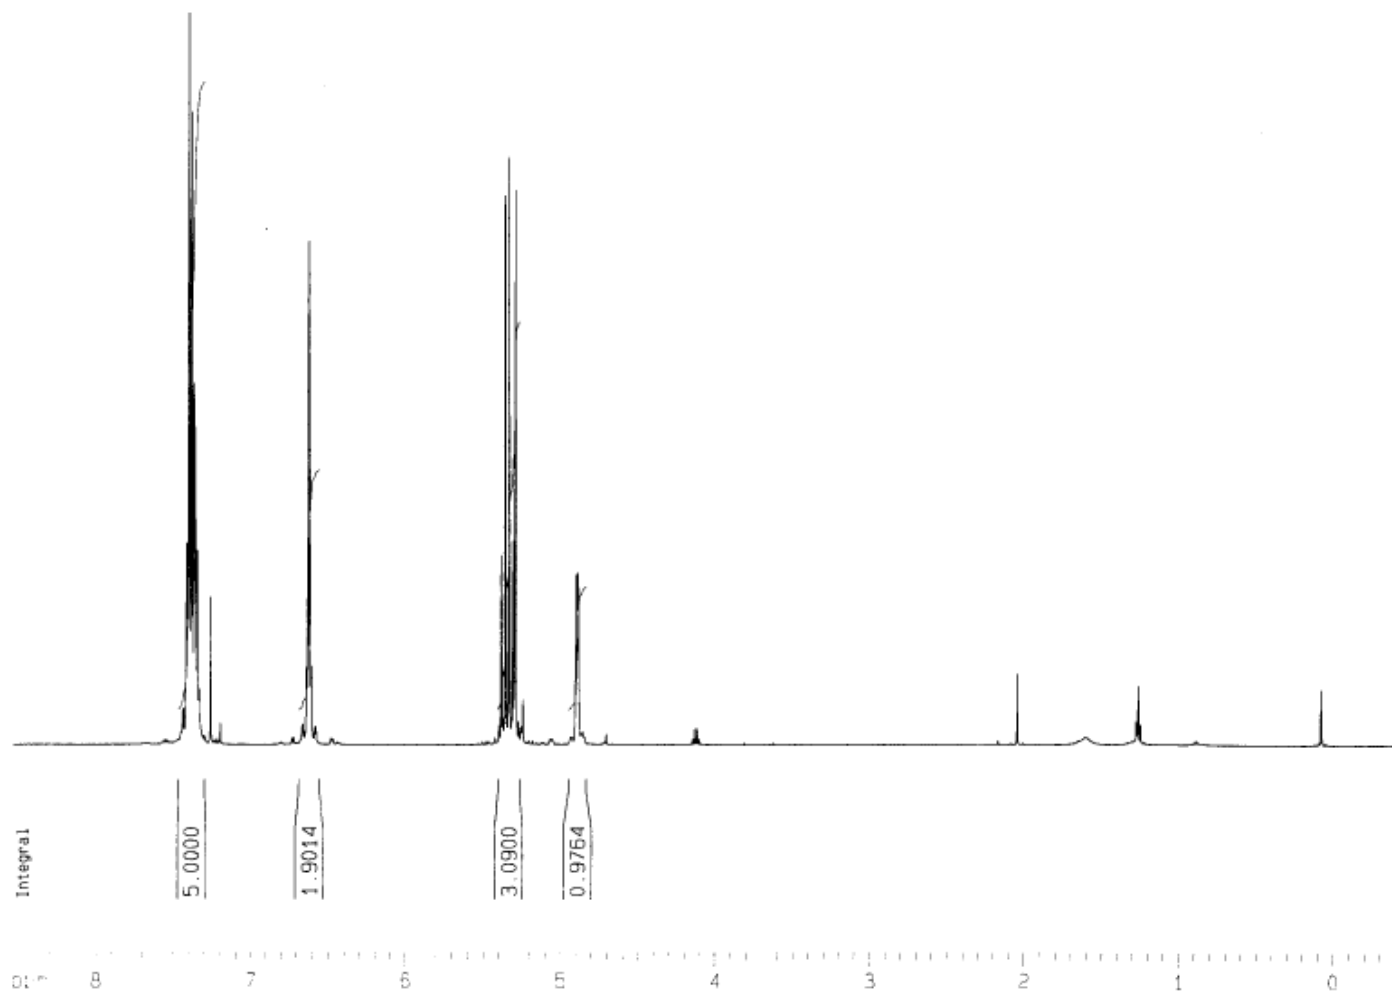

Current Data Parameters  
 NAME Hondou  
 EXPNO 1  
 PROCNO 1

F2 - Acquisition Parameters  
 Date\_ 20050213  
 Time 19.10  
 INSTRUM drx500  
 PROBHD 5 mm Multinucl  
 PULPROG zg30  
 TO 65536  
 SOLVENT CDC13  
 NS 16  
 DS 2  
 SWH 10330.578 Hz  
 FIDRES 0.157632 Hz  
 AQ 3.1719923 sec  
 RG 181  
 DW 48.400 usec  
 DE 6.00 usec  
 TE 295.2 K  
 D1 1.00000000 sec  
 MCREST 0.00000000 sec  
 MCWRK 0.01500000 sec

----- CHANNEL f1 -----  
 NUC1 1H  
 P1 10.30 usec  
 PL1 -6.00 dB  
 SFO1 500.1330885 MHz

F2 - Processing parameters  
 SI 32768  
 SF 500.1300137 MHz  
 MDW EM  
 SSB 0  
 LB 0.30 Hz  
 GB 0  
 PC 1.00

1D NMR plot parameters  
 CX 20.00 cm  
 CY 11.01 cm  
 F1P 8.540 ppm  
 F1 4270.93 Hz  
 F2P -0.469 ppm  
 F2 -234.61 Hz  
 PPMCM 0.45044 ppm/cm  
 HZCM 225.27739 Hz/cm

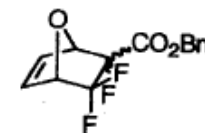

more polar

3aD

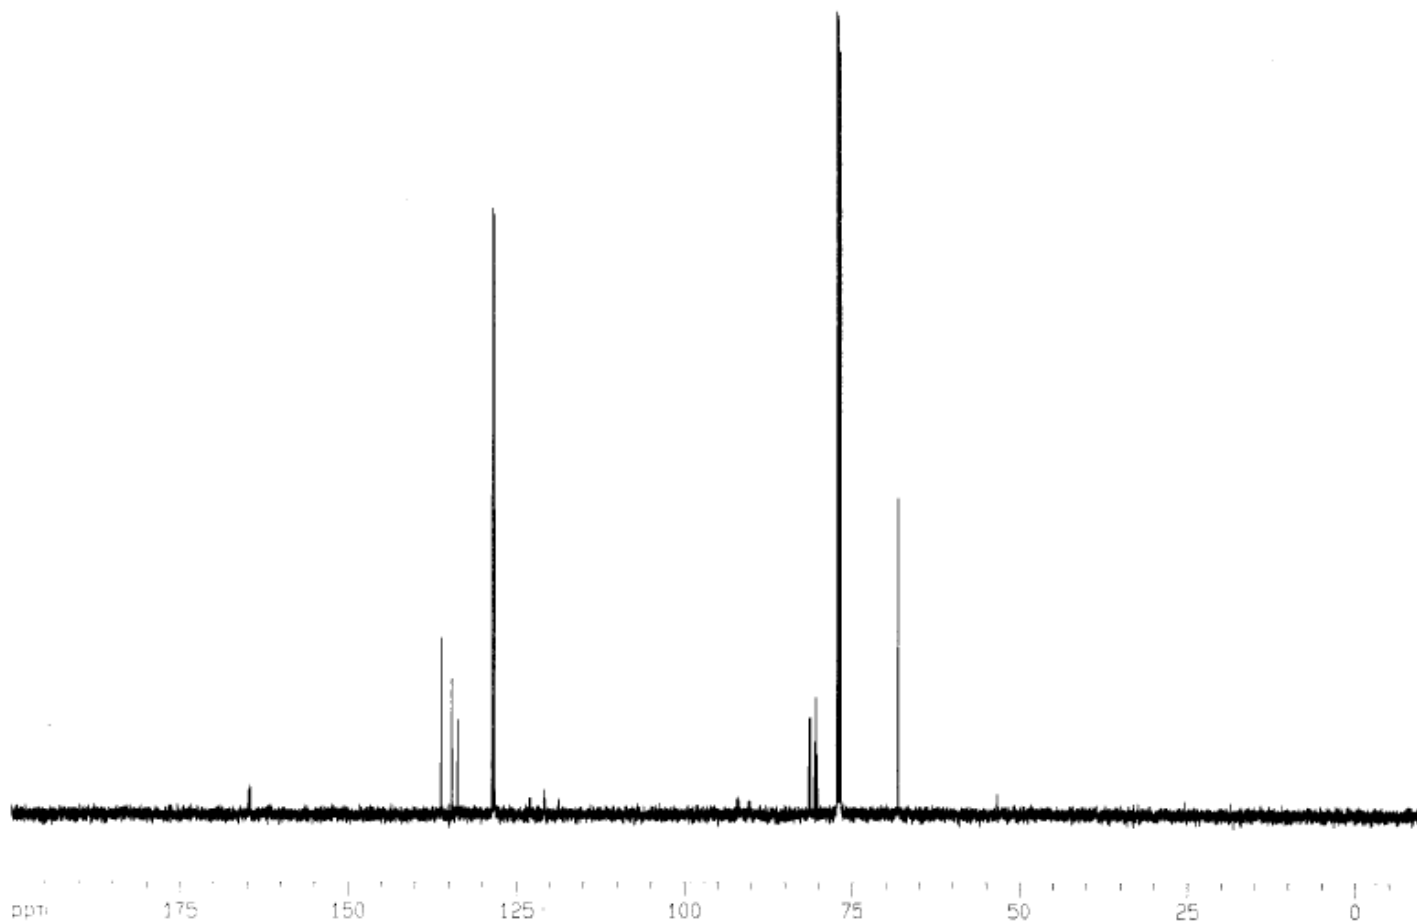

Current Data Parameters  
 NAME Hondou  
 EXPNO 2  
 PROCNO 1

F2 - Acquisition Parameters  
 Date\_ 20050213  
 Time 19.18  
 INSTRUM drx500  
 PROBHD 5 mm Multinucl  
 PULPROG zgpg30  
 TD 65536  
 SOLVENT CDC13  
 NS 256  
 DS 2  
 SMH 30030.029 Hz  
 FIDRES 0.458222 Hz  
 AQ 1.0912244 sec  
 RG 2298.8  
 DM 16.650 usec  
 DE 6.00 usec  
 TE 296.3 K  
 D1 0.50000000 sec  
 d11 0.03000000 sec  
 MCREST 0.00000000 sec  
 MCWRK 0.01500000 sec

----- CHANNEL f1 -----  
 NUC1 13C  
 P1 5.70 usec  
 PL1 -2.00 dB  
 SFO1 125.7703643 MHz

----- CHANNEL f2 -----  
 CPOPRG2 waltz16  
 NUC2 1H  
 PCPO2 100.00 usec  
 PL2 -6.00 dB  
 PL12 13.74 dB  
 PL13 13.74 dB  
 SFO2 500.1320005 MHz

F2 - Processing parameters  
 SI 32768  
 SF 125.7577960 MHz  
 MDM EM  
 SSB 0  
 LB 1.00 Hz  
 GB 0  
 PC 1.40

1D NMR plot parameters  
 CX 20.00 cm  
 CY 11.46 cm  
 F1P 200.000 ppm  
 F1 25151.56 Hz  
 F2P -10.000 ppm  
 F2 -1257.58 Hz  
 PPMCM 10.50000 ppm/cm  
 HZCM 1320.45679 Hz/cm

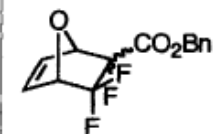

more polar  
**3aD**



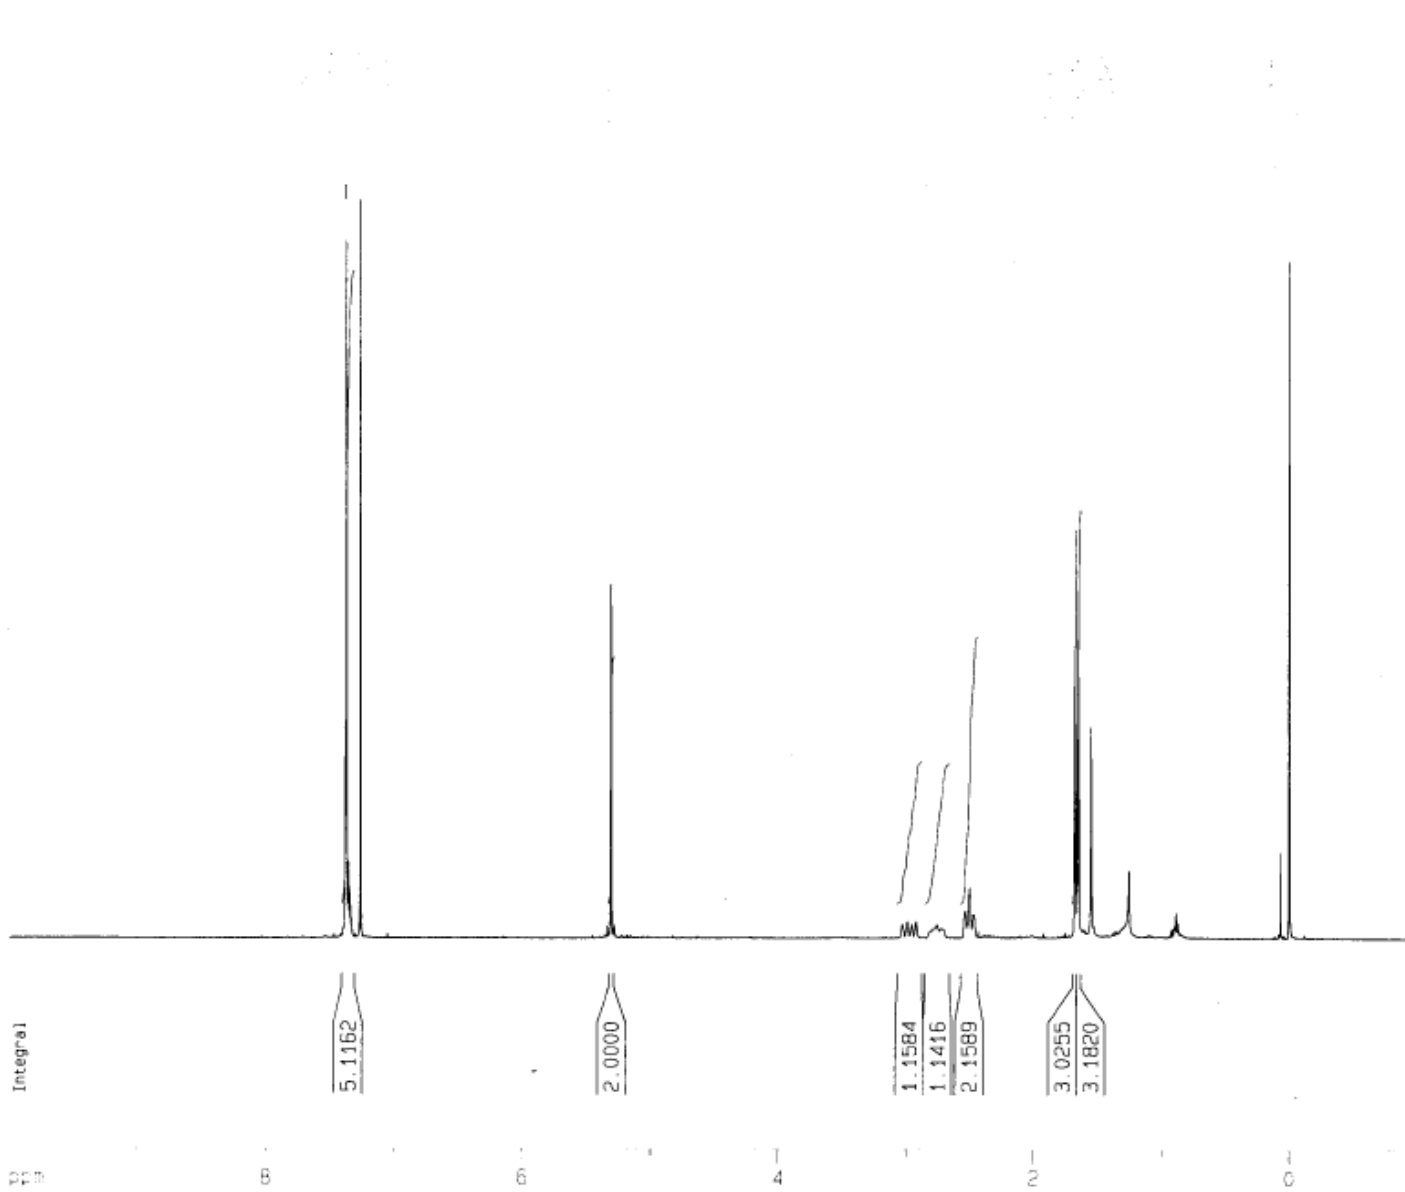

Current Data Parameters  
 NAME hondo-05.1.21  
 EXPNO 1  
 PROCNO 1

F2 - Acquisition Parameters  
 Date\_ 20050121  
 Time 16.39  
 INSTRUM drx500  
 PROBHD 5 mm Multinucl  
 PULPROG zg30  
 TD 65536  
 SOLVENT 020  
 NS 16  
 DS 2  
 SWH 10330.578 Hz  
 FIDRES 0.157632 Hz  
 AQ 3.1719923 sec  
 RG 724.1  
 DW 48.400 usec  
 DE 6.00 usec  
 TE 295.5 K  
 D1 1.0000000 sec  
 MCREST 0.0000000 sec  
 MCWRK 0.0150000 sec

===== CHANNEL f1 =====  
 NUC1 1H  
 P1 10.30 usec  
 PL1 -6.00 dB  
 SFO1 500.1330885 MHz

F2 - Processing parameters  
 SI 32768  
 SF 500.1300134 MHz  
 WDW EM  
 SSB 0  
 LB 0.30 Hz  
 GB 0  
 PC 1.00

1D NMR plot parameters  
 CX 20.00 cm  
 CY 10.57 cm  
 F1P 10.000 ppm  
 F1 5001.30 Hz  
 F2P -1.000 ppm  
 F2 -500.13 Hz  
 PPMCM 0.55000 ppm/cm  
 HZCM 275.07150 Hz/cm

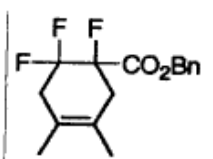

**3aE**

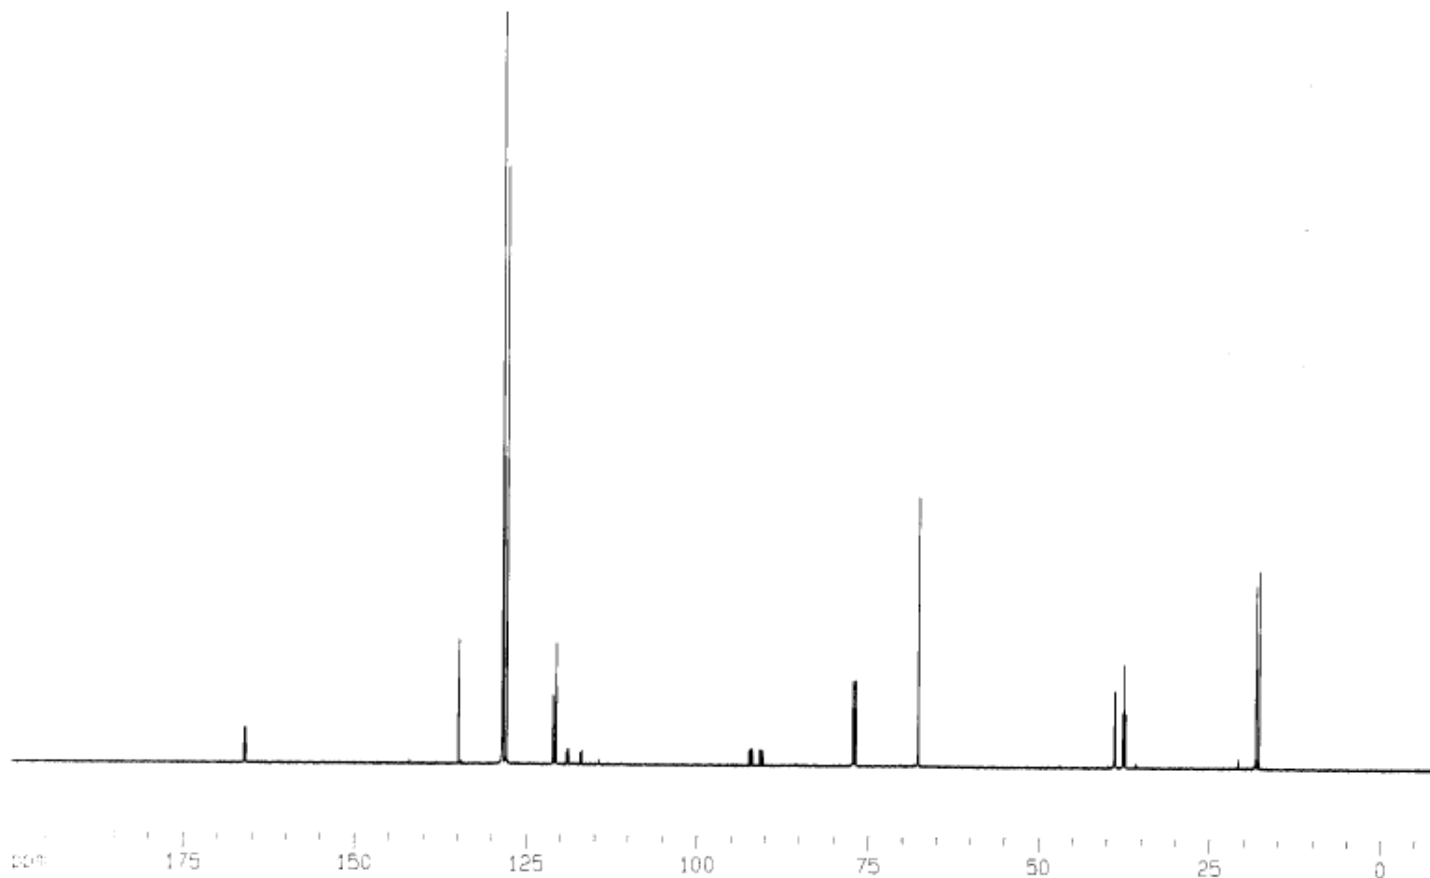

Current Data Parameters  
 NAME hondo-05.3.4-Y  
 EXPNO 2  
 PROCNO 1

F2 - Acquisition Parameters  
 Date\_ 20050304  
 Time 19.55  
 INSTRUM drx500  
 PROBHD 5 mm Multinucl  
 PULPROG zgpg30  
 TD 65536  
 SOLVENT CDCl3  
 NS 256  
 DS 2  
 SWH 30030.029 Hz  
 FIDRES 0.458222 Hz  
 AQ 1.0912244 sec  
 RG 3649.1  
 DW 16.650 usec  
 DE 6.00 usec  
 TE 296.6 K  
 D1 0.5000000 sec  
 d11 0.0300000 sec  
 MCREST 0.0000000 sec  
 MCMRK 0.0150000 sec

\*\*\*\*\* CHANNEL f1 \*\*\*\*\*  
 NUC1 13C  
 P1 5.70 usec  
 PL1 -2.00 dB  
 SF01 125.7703643 MHz

\*\*\*\*\* CHANNEL f2 \*\*\*\*\*  
 CPOPRG2 waltz16  
 NUC2 1H  
 PCPD2 100.00 usec  
 PL2 -6.00 dB  
 PL12 13.74 dB  
 PL13 13.74 dB  
 SF02 500.1320005 MHz

F2 - Processing parameters  
 S1 32768  
 SF 125.7578180 MHz  
 WDW EM  
 SSB 0  
 LB 1.00 Hz  
 GB 0  
 PC 1.40

1D NMR plot parameters  
 CX 20.00 cm  
 CY 10.52 cm  
 F1P 200.000 ppm  
 F1 25151.56 Hz  
 F2P -10.000 ppm  
 F2 -1257.58 Hz  
 PPNM 10.50000 ppm/cm  
 HZCM 1320.45703 Hz/cm

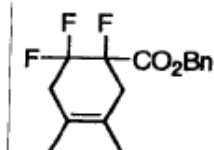

**3aE**

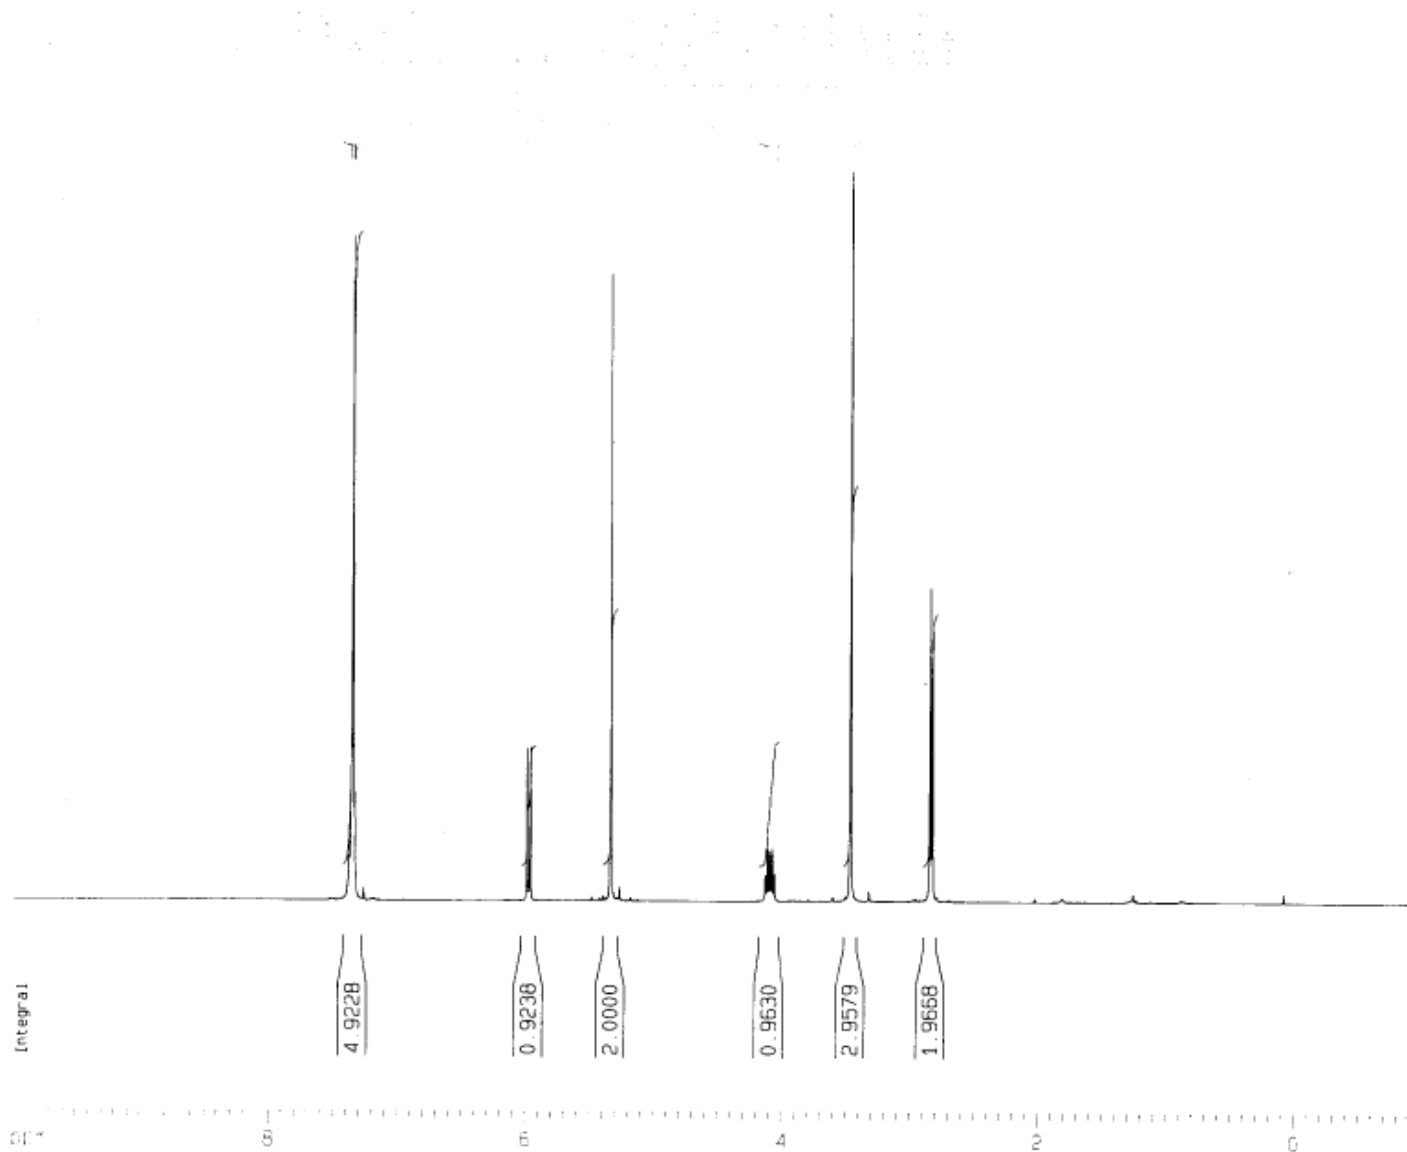

Current Data Parameters  
 NAME 05.1.25-g  
 EXPNO 1  
 PROCNO 1

F2 - Acquisition Parameters  
 Date\_ 20050125  
 Time 18.26  
 INSTRUM drx500  
 PROBHD 5 mm Multinuc1  
 PULPROG zg30  
 TD 65536  
 SOLVENT CDCl3  
 NS 16  
 DS 2  
 SWH 10330.578 Hz  
 FIDRES 0.157632 Hz  
 AQ 3.1719923 sec  
 RG 35.9  
 DW 48.400 usec  
 DE 6.00 usec  
 TE 295.6 K  
 D1 1.00000000 sec  
 MCREST 0.00000000 sec  
 MCWAK 0.01500000 sec

===== CHANNEL f1 =====  
 NUC1 1H  
 P1 10.30 usec  
 PL1 -6.00 dB  
 SF01 500.1330885 MHz

F2 - Processing parameters  
 SI 32768  
 SF 500.1300127 MHz  
 HDW EM  
 SSB 0  
 LB 0.30 Hz  
 SB 0  
 PC 1.00

1D NMR plot parameters  
 CX 20.00 cm  
 CY 10.39 cm  
 F1P 10.000 ppm  
 F1 5001.30 Hz  
 F2P -1.000 ppm  
 F2 -500.13 Hz  
 PPMCM 0.55000 ppm/cm  
 HZCM 275.07150 Hz/cm

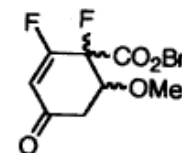

less polar  
 3aF

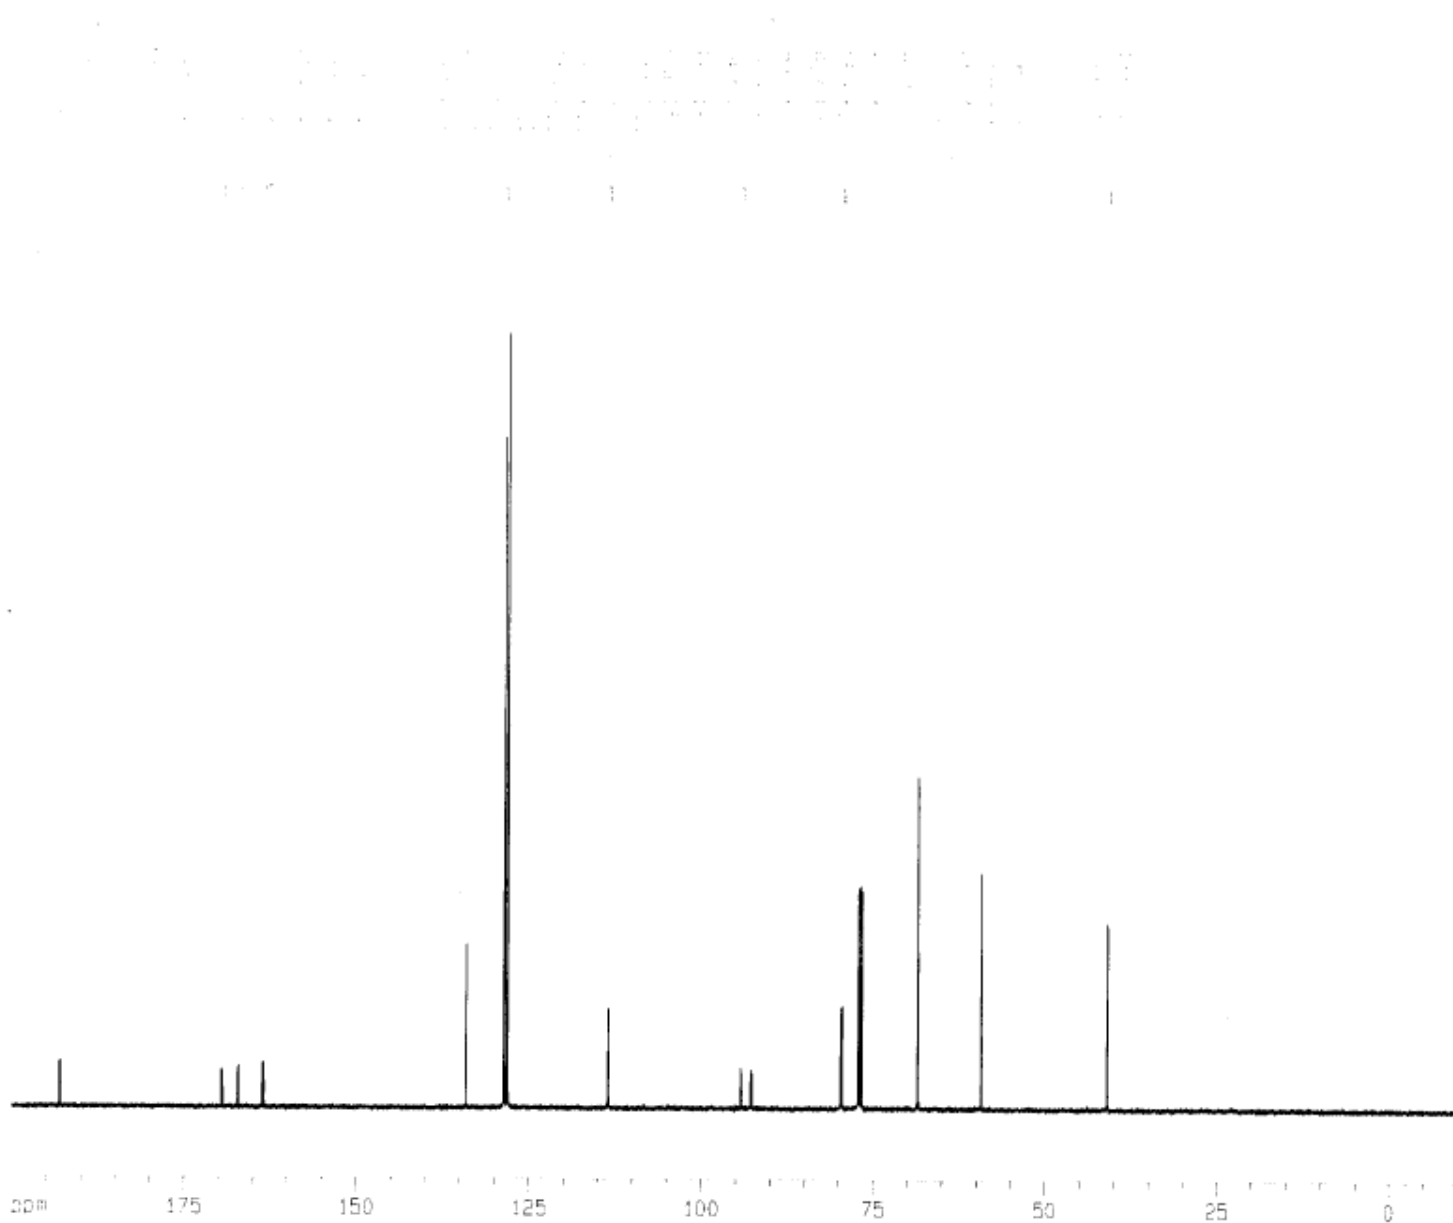

Current Data Parameters  
 NAME 05.1.25-g  
 EXPNO 2  
 PROCNO 1

F2 - Acquisition Parameters  
 Date\_ 20050125  
 Time 18.34  
 INSTRUM drx500  
 PROBHD 5 mm Multinucl  
 PULPROG zgpg30  
 TD 65536  
 SOLVENT CDCl3  
 NS 256  
 DS 2  
 SWH 30030.029 Hz  
 FIDRES 0.458222 Hz  
 AQ 1.0912244 sec  
 RG 3649.1  
 DW 16.650 usec  
 DE 6.00 usec  
 TE 296.6 K  
 D1 0.5000000 sec  
 d11 0.0300000 sec  
 MCREST 0.0000000 sec  
 MCMRK 0.0150000 sec

----- CHANNEL f1 -----  
 NUC1 13C  
 P1 5.70 usec  
 PL1 -2.00 dB  
 SF01 125.7703643 MHz

----- CHANNEL f2 -----  
 CPOPRG2 wa1tz16  
 NUC2 1H  
 PCPD2 100.00 usec  
 PL2 -6.00 dB  
 PL12 13.74 dB  
 PL13 13.74 dB  
 SF02 500.1320005 MHz

F2 - Processing parameters  
 SI 32768  
 SF 125.7578070 MHz  
 MDW EM  
 SSB 0  
 LB 1.00 Hz  
 GB 0  
 PC 1.40

1D NMR plot parameters  
 CX 20.00 cm  
 CY 10.77 cm  
 F1P 200.000 ppm  
 F1 25151.56 Hz  
 F2P -10.000 ppm  
 F2 -1257.58 Hz  
 PPMCM 10.50000 ppm/cm  
 HZCM 1320.45691 Hz/cm

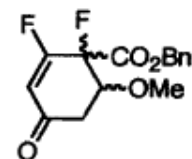

less polar

3aF

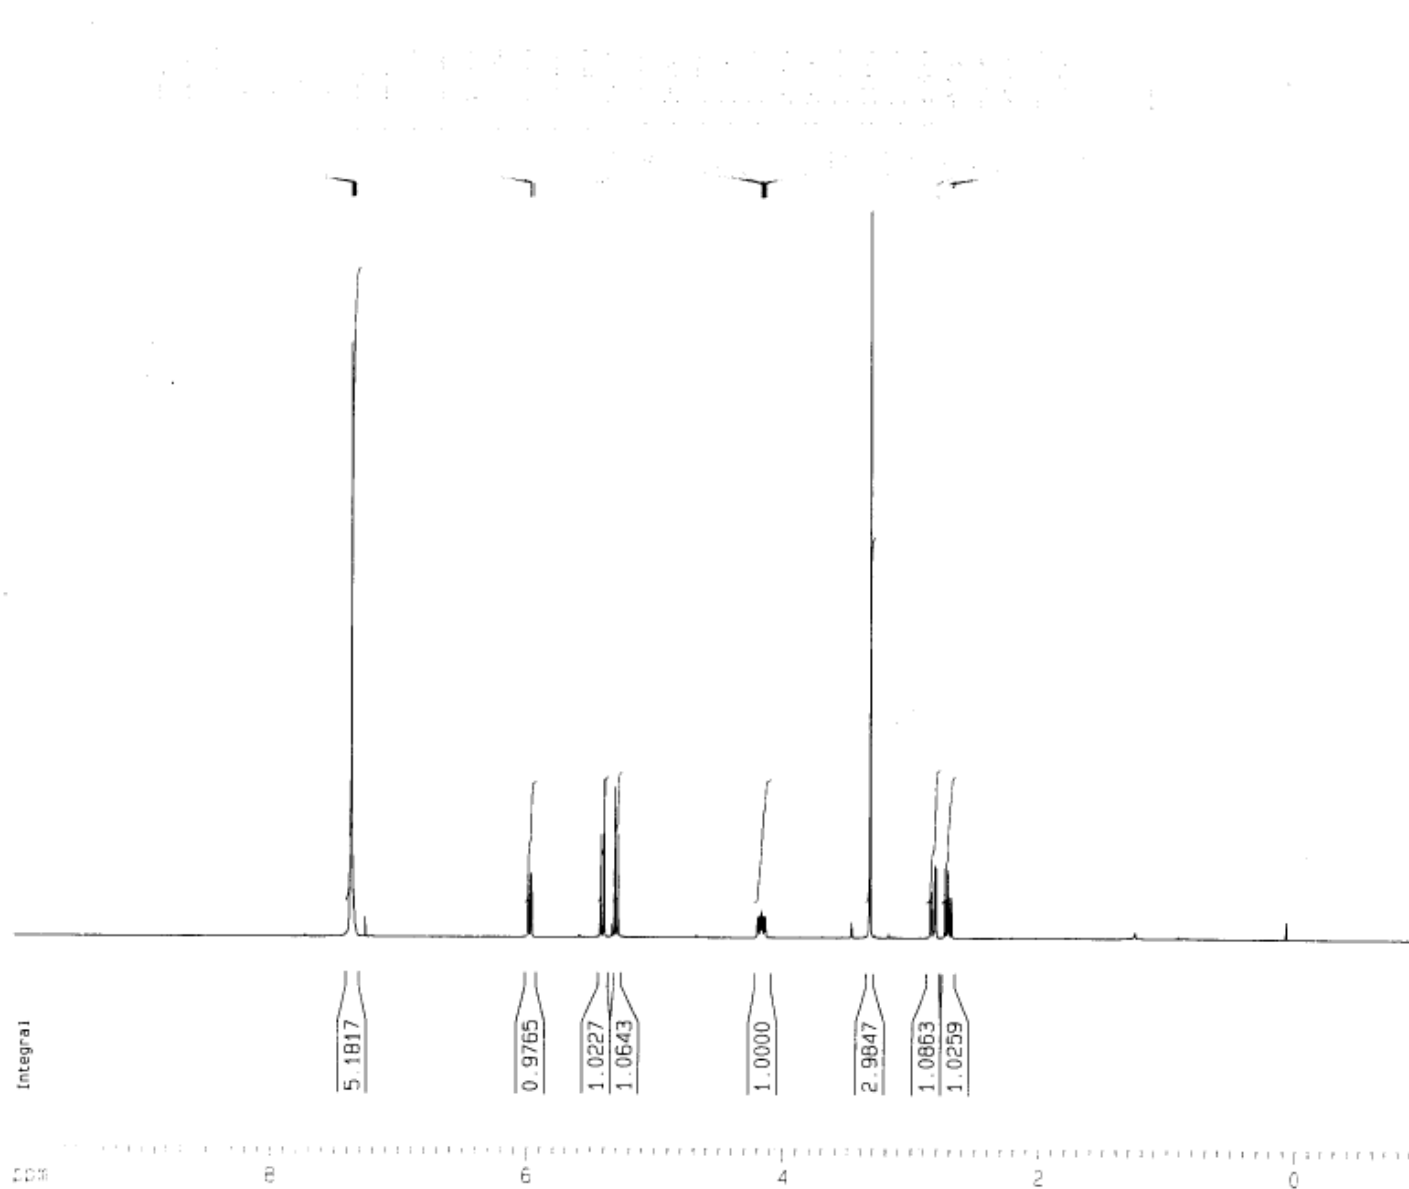

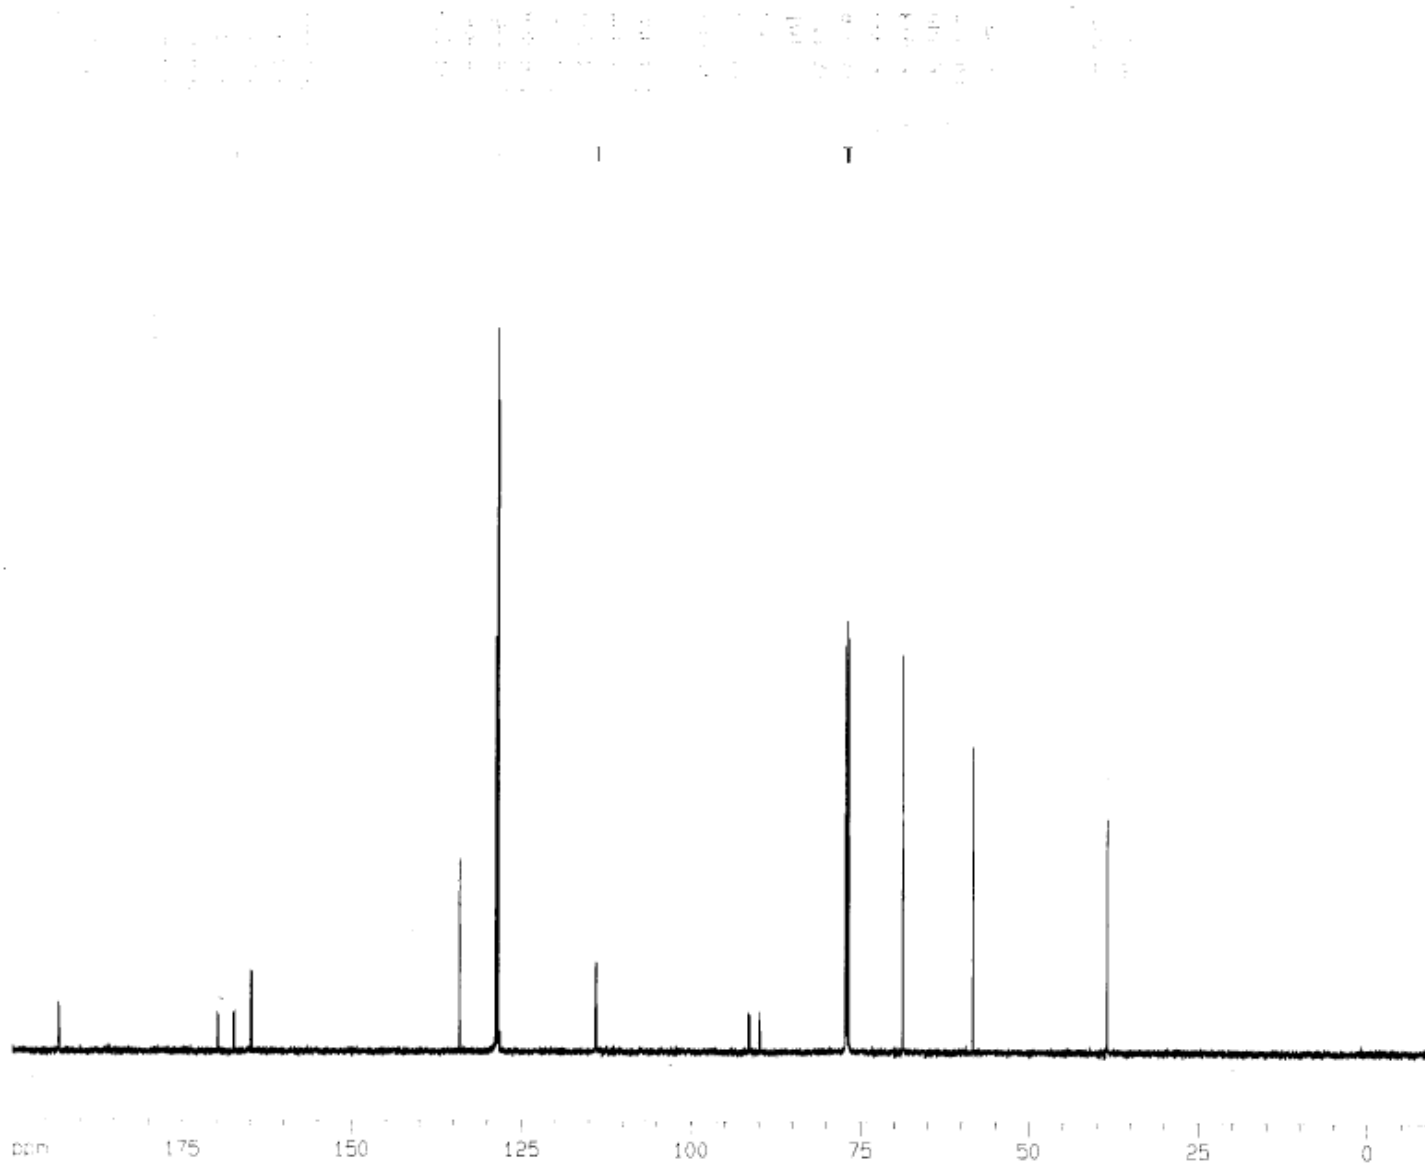

Current Data Parameters

NAME 05.1.25-y  
 EXPNO 2  
 PROCNO 1

F2 - Acquisition Parameters

Date\_ 20050125  
 Time 19.40  
 INSTRUM drx500  
 PROBHD 5 mm Multinucl  
 PULPROG zgpg30  
 TD 65536  
 SOLVENT CDC13  
 NS 256  
 DS 2  
 SWH 30030.029 Hz  
 FIDRES 0.458222 Hz  
 AQ 1.0912244 sec  
 RG 3649.1  
 DW 16.650 usec  
 DE 6.00 usec  
 TE 296.6 K  
 D1 0.50000000 sec  
 d11 0.03000000 sec  
 MCREST 0.00000000 sec  
 MCNRK 0.01500000 sec

\*\*\*\*\* CHANNEL f1 \*\*\*\*\*

NUC1 13C  
 P1 5.70 usec  
 PL1 -2.00 dB  
 SF01 125.7703643 MHz

\*\*\*\*\* CHANNEL f2 \*\*\*\*\*

CPOPRG2 waltz16  
 NUC2 1H  
 PCPD2 100.00 usec  
 PL2 -6.00 dB  
 PL12 13.74 dB  
 PL13 13.74 dB  
 SF02 500.1320005 MHz

F2 - Processing parameters

SI 32768  
 SF 125.7578024 MHz  
 WDM EM  
 SSB 0  
 LB 1.00 Hz  
 GB 0  
 PC 1.40

1D NMR plot parameters

CX 20.00 cm  
 CY 10.73 cm  
 F1P 200.000 ppm  
 F1 25151.56 Hz  
 F2P -10.000 ppm  
 F2 -1257.58 Hz  
 PPMCH 10.50000 ppm/cm  
 HZCH 1320.45691 Hz/cm

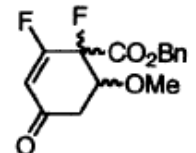

more polar

3aF

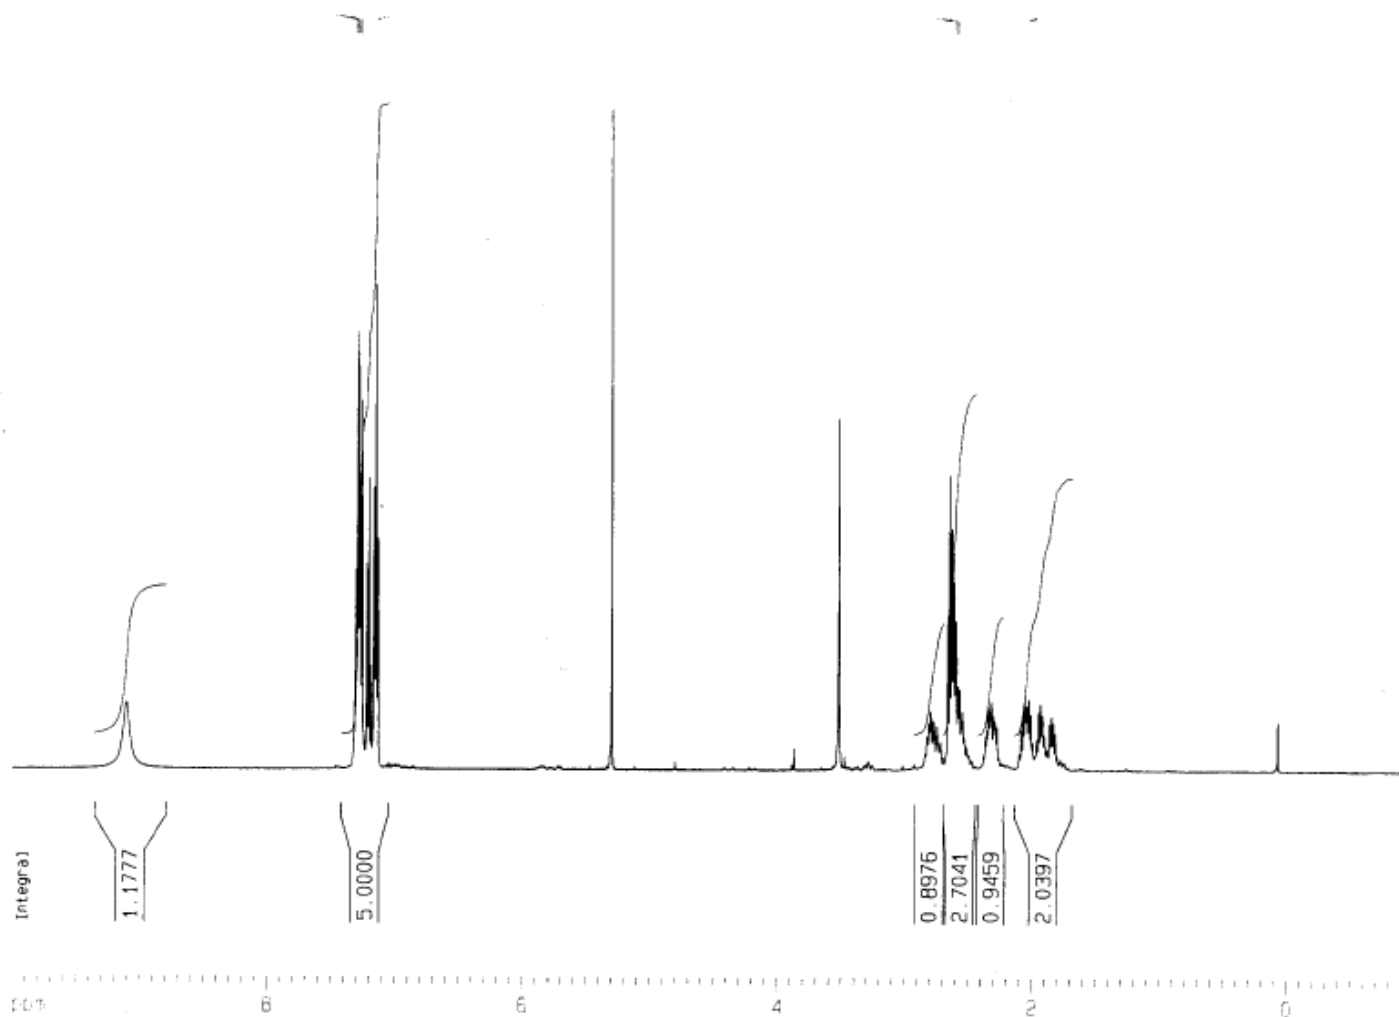

Current Data Parameters  
 NAME yamada-05.2.9  
 EXPNO 2  
 PROCNO 1

F2 - Acquisition Parameters  
 Date\_ 20050209  
 Time 21.20  
 INSTRUM drx500  
 PROBHD 5 mm Multinucl  
 PULPROG zg30  
 TD 65536  
 SOLVENT CDC13  
 NS 16  
 DS 2  
 SWH 10330.578 Hz  
 FIDRES 0.157632 Hz  
 AQ 3.1719923 sec  
 RG 287.4  
 DM 48.400 usec  
 DE 6.00 usec  
 TE 295.6 K  
 O1 1.00000000 sec  
 MCREST 0.00000000 sec  
 MCNRK 0.01500000 sec

===== CHANNEL f1 =====  
 NUC1 1H  
 P1 10.30 usec  
 PL1 -6.00 dB  
 SFO1 500.1330885 MHz

F2 - Processing parameters  
 SI 32768  
 SF 500.1300137 MHz  
 MDW EM  
 SSB 0  
 LB 0.30 Hz  
 GB 0  
 PC 1.00

1D NMR plot parameters  
 CX 20.00 cm  
 CY 9.41 cm  
 F1P 10.000 ppm  
 F1 5001.30 Hz  
 F2P -1.000 ppm  
 F2 -500.13 Hz  
 PPMCM 0.55000 ppm/cm  
 HZCM 275.07150 Hz/cm

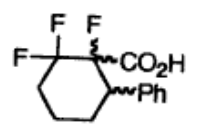

4

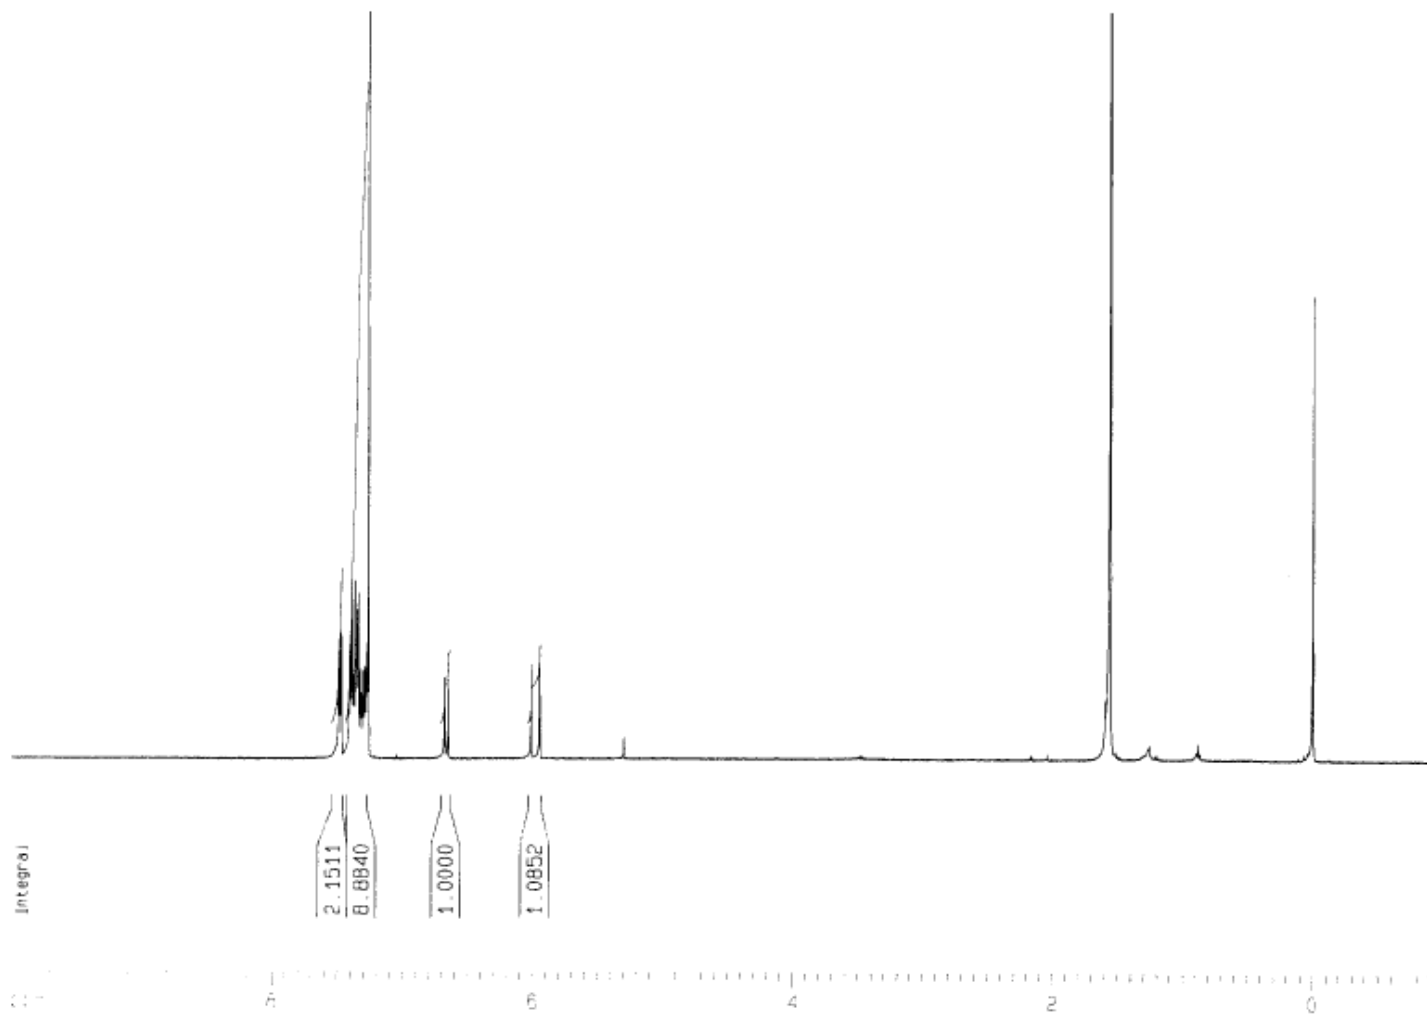

Current Data Parameters  
 NAME hondo-5-9-16  
 EXPNO 1  
 PROCNO 1

F2 - Acquisition Parameters  
 Date\_ 20050916  
 Time 16.52  
 INSTRUM drx500  
 PROBHD 5 mm Multinucl  
 PULPROG zg30  
 TO 65536  
 SOLVENT CDCl3  
 NS 16  
 DS 2  
 SWH 10330.578 Hz  
 FIDRES 0.157632 Hz  
 AQ 3.1719923 sec  
 RG 1024  
 DW 48.400 usec  
 DE 6.00 usec  
 TE 299.9 K  
 D1 1.0000000 sec  
 MCREST 0.0000000 sec  
 MCWRK 0.0150000 sec

----- CHANNEL f1 -----  
 NUC1 1H  
 P1 10.30 usec  
 PL1 -6.00 dB  
 SF01 500.1330885 MHz

F2 - Processing parameters  
 SI 32768  
 SF 500.1300131 MHz  
 WDN EM  
 SSB 0  
 LB 0.30 Hz  
 GB 0  
 PC 1.00

1D NMR plot parameters  
 CX 20.00 cm  
 CY 36.75 cm  
 F1P 10.000 ppm  
 F1 5001.30 Hz  
 F2P -1.000 ppm  
 F2 -500.13 Hz  
 PPMCM 0.55000 ppm/cm  
 HZCM 275.07150 Hz/cm

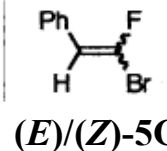



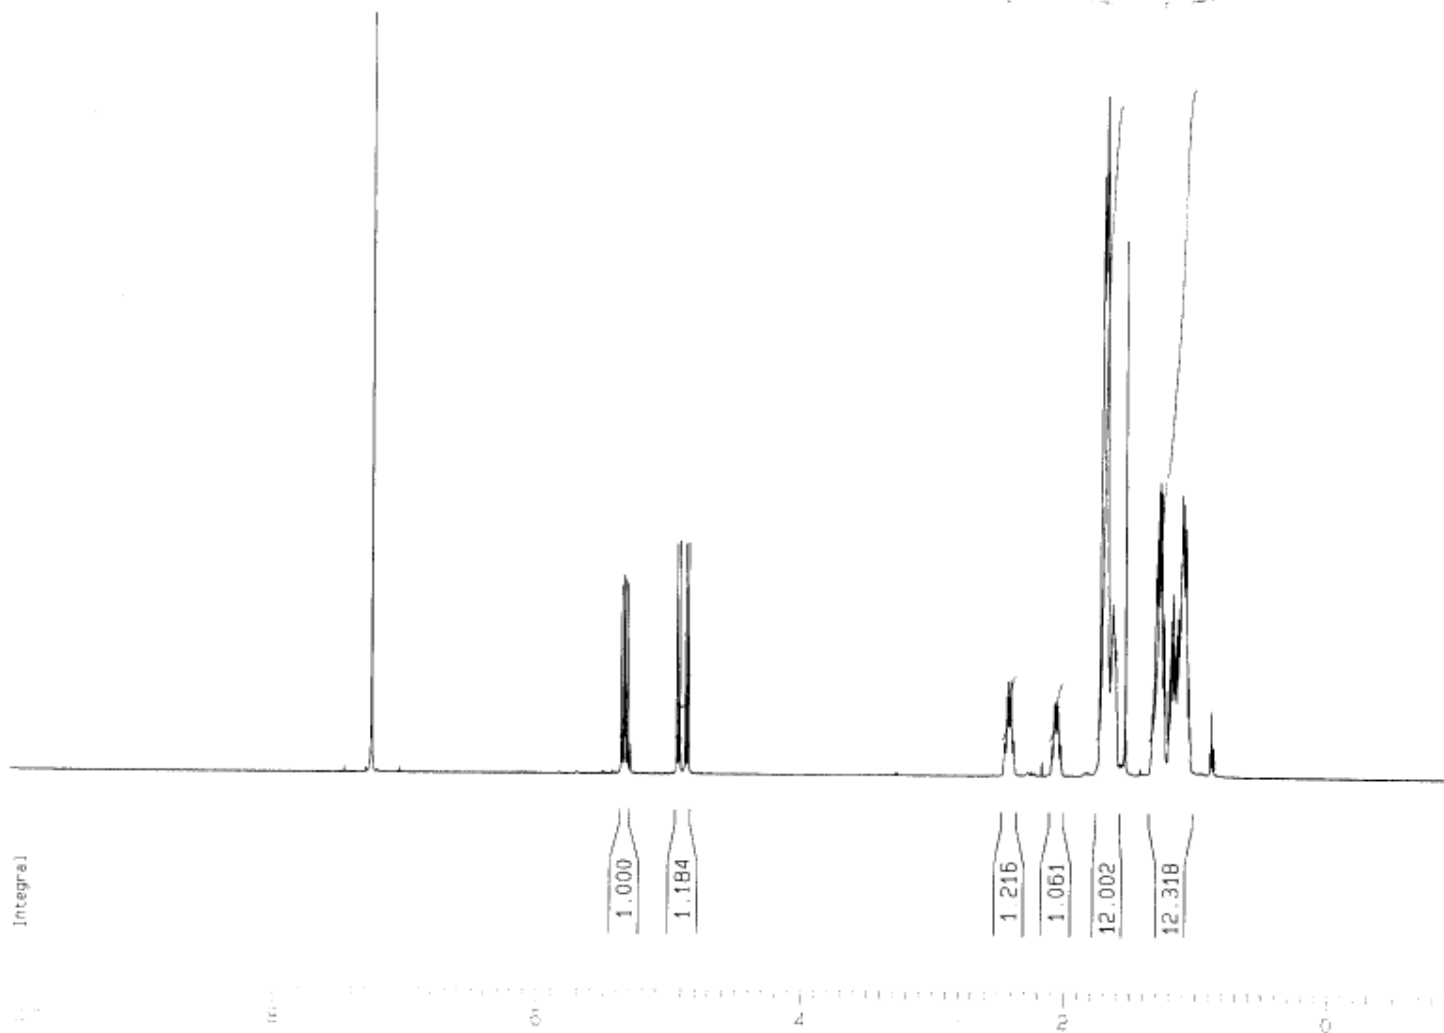

Current Data Parameters  
 NAME honda-5-2-2  
 EXPNO 1  
 PROCNO 1

F2 - Acquisition Parameters  
 Date\_ 20060202  
 Time 15.11  
 INSTRUM drx500  
 PROBHD 5 mm Multinucl  
 PULPROG zg30  
 TD 65536  
 SOLVENT CDCl3  
 NS 16  
 DS 2  
 SWH 10330.578 Hz  
 FIDRES 0.157632 Hz  
 AQ 3.1719923 sec  
 RG 456.1  
 DW 48.400 usec  
 DE 6.00 usec  
 TE 295.1 K  
 D1 1.00000000 sec  
 MCREST 0.00000000 sec  
 MCWRK 0.01500000 sec

----- CHANNEL f1 -----  
 NUC1 1H  
 P1 10.30 usec  
 PL1 -6.00 dB  
 SFO1 500.1330885 MHz

F2 - Processing parameters  
 SI 32768  
 SF 500.1300131 MHz  
 WDW EM  
 SSB 0  
 LB 0.30 Hz  
 GB 0  
 PC 1.00

1D NMR plot parameters  
 CX 20.00 cm  
 CY 14.39 cm  
 F1P 10.000 ppm  
 F1 5001.30 Hz  
 F2P -1.000 ppm  
 F2 -500.13 Hz  
 PPMCM 0.55000 ppm/cm  
 HZCM 275.07150 Hz/cm

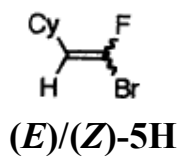

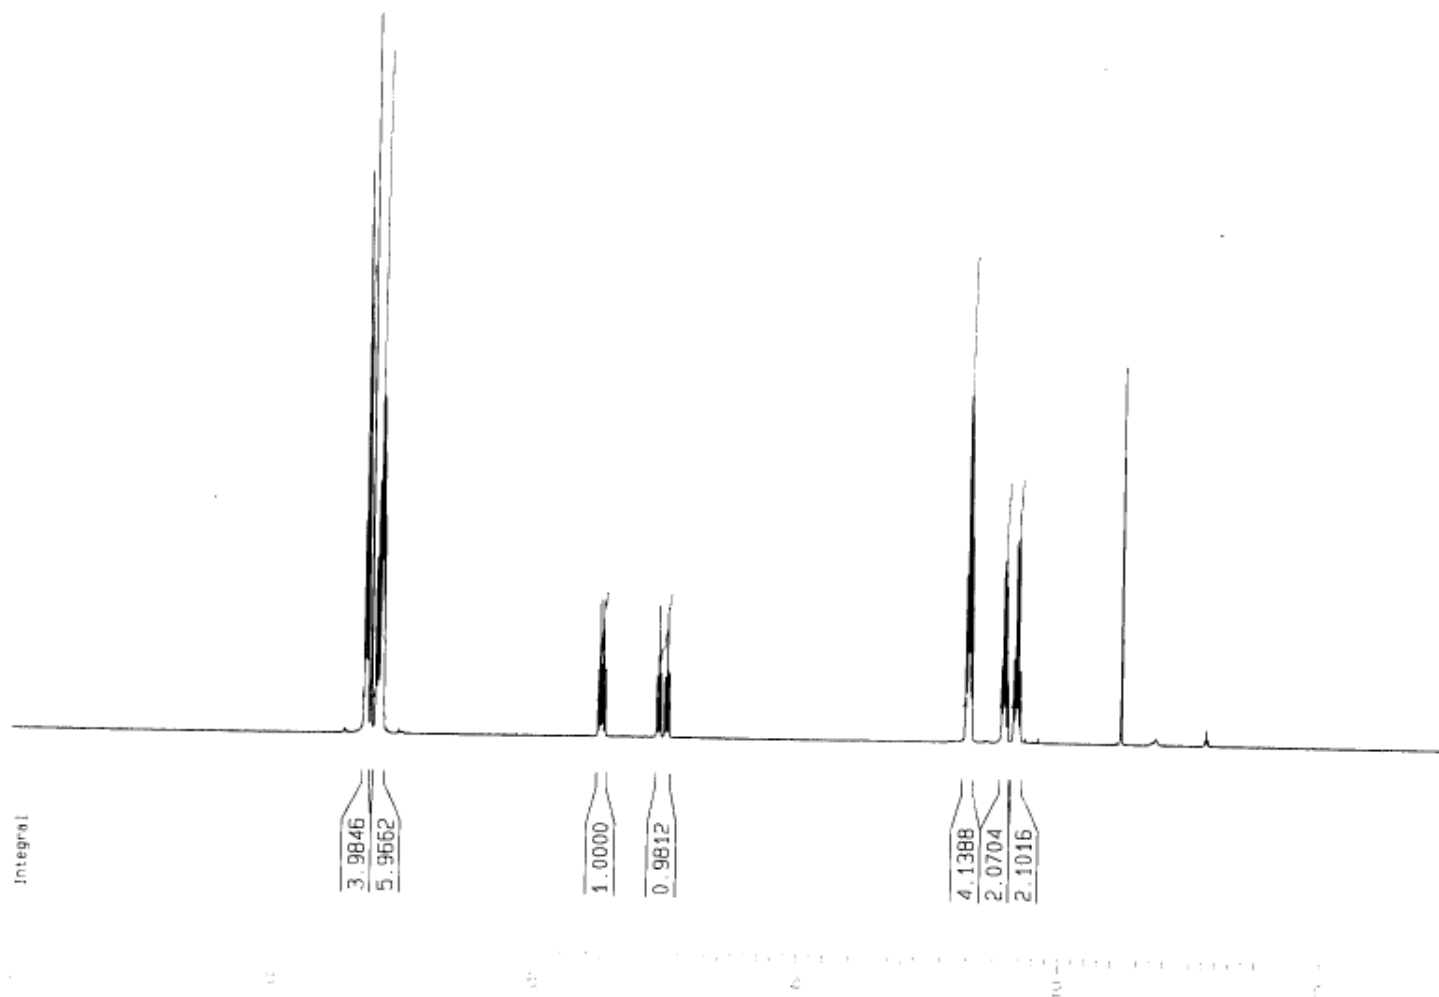

Current Data Parameters  
 NAME honda-5-12-2  
 EXPNO 1  
 PROCNO 1

F2 - Acquisition Parameters  
 Date\_ 20051202  
 Time 14.49  
 INSTRUM drx500  
 PROBHD 5 mm Multinucl  
 PULPROG zg30  
 TD 65536  
 SOLVENT CDCl3  
 NS 16  
 DS 2  
 SWH 10330.578 Hz  
 FIDRES 0.157632 Hz  
 AQ 3.1719923 sec  
 RG 724.1  
 JW 48.400 usec  
 DE 6.00 usec  
 TE 297.0 K  
 D1 1.00000000 sec  
 MCREST 0.00000000 sec  
 MCWPK 0.01500000 sec

===== CHANNEL f1 =====  
 NUC1 1H  
 P1 10.30 usec  
 PL1 -6.00 dB  
 SFO1 500.1330885 MHz

F2 - Processing parameters  
 SI 32768  
 SF 500.1300131 MHz  
 WDW EM  
 SSB 0  
 LB 0.30 Hz  
 GB 0  
 PC 1.00

1D NMR plot parameters  
 CX 20.00 cm  
 CY 10.18 cm  
 F1P 10.000 ppm  
 F1 5001.30 Hz  
 F2P -1.000 ppm  
 F2 -500.13 Hz  
 PPMCM 0.55000 ppm/cm  
 HZCM 275.07150 Hz/cm

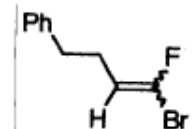

**(E)/(Z)-5I**

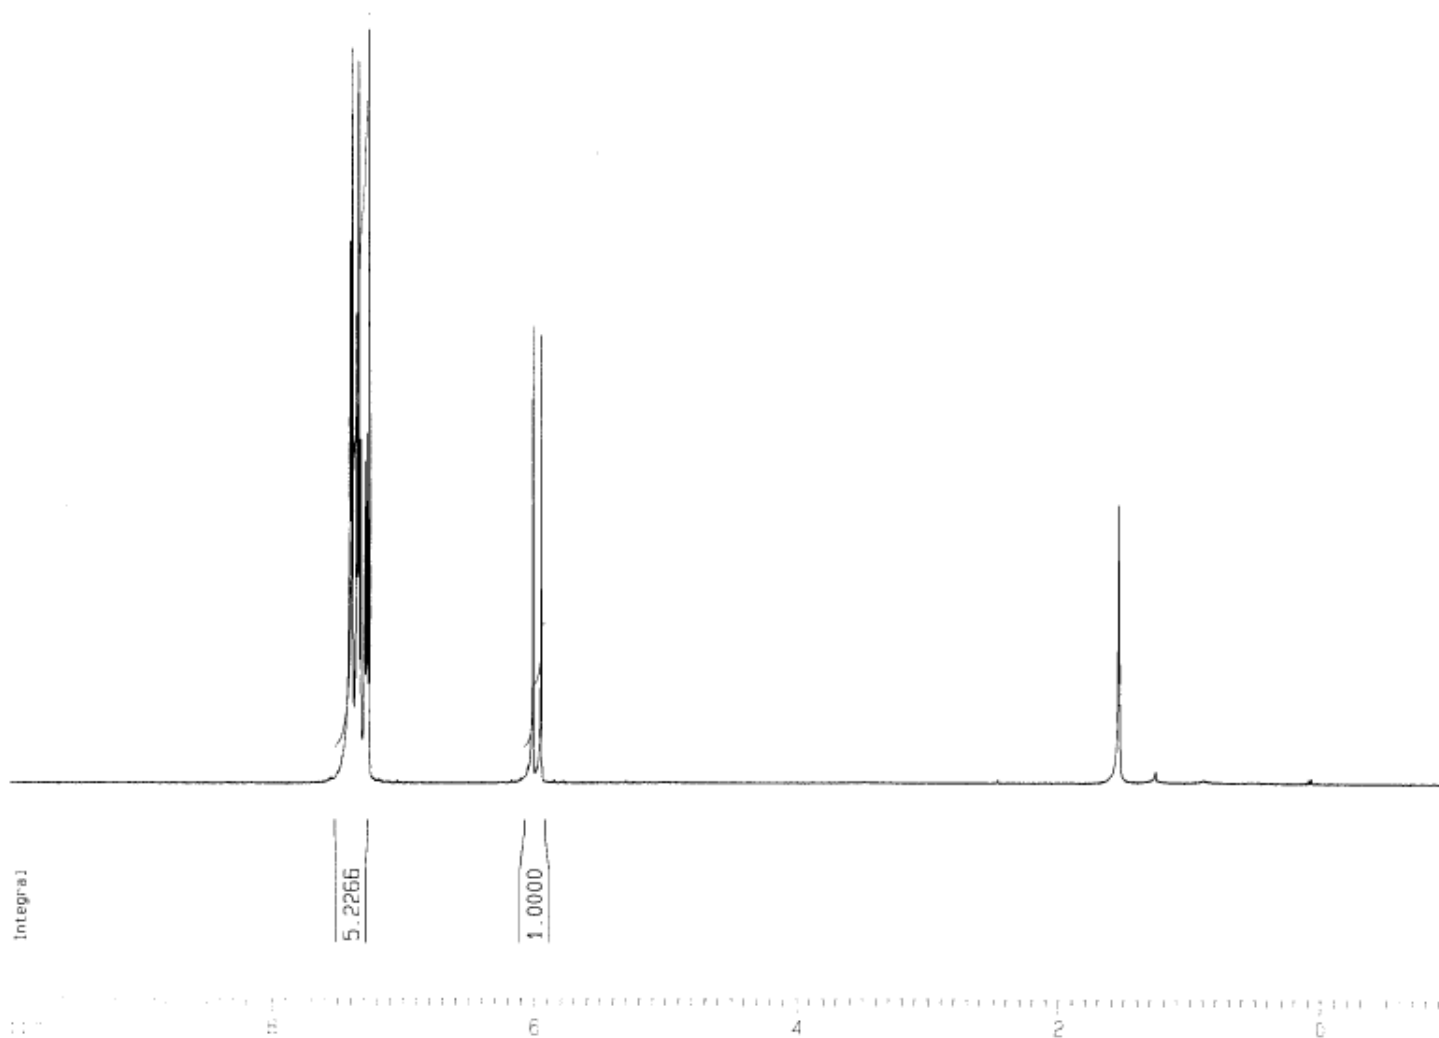

Current Data Parameters  
 NAME hondo-5-9-26  
 EXPNO 1  
 PRDCND 1

F2 - Acquisition Parameters  
 Date\_ 20050926  
 Time 19.33  
 INSTRUM drx500  
 PROBHD 5 mm Multinucl  
 PULPROG zg30  
 TD 65536  
 SOLVENT CDCl3  
 NS 16  
 DS 2  
 SWH 10330.578 Hz  
 FIDRES 0.157632 Hz  
 AQ 3.1719923 sec  
 RG 812.7  
 DW 48.400 usec  
 DE 6.00 usec  
 TE 299.8 K  
 D1 1.00000000 sec  
 MCREST 0.00000000 sec  
 MCWRK 0.01500000 sec

===== CHANNEL f1 =====  
 NUC1 1H  
 P1 10.30 usec  
 PL1 -6.00 dB  
 SF01 500.1330885 MHz

F2 - Processing parameters  
 SI 32768  
 SF 500.1300127 MHz  
 WDW EM  
 SSB 0  
 LB 0.30 Hz  
 GB 0  
 PC 1.00

1D NMR plot parameters  
 CX 20.00 cm  
 CY 10.93 cm  
 F1P 10.000 ppm  
 F1 5001.30 Hz  
 F2P -1.000 ppm  
 F2 -500.13 Hz  
 PPMCM 0.55000 ppm/cm  
 HZCM 275.07150 Hz/cm

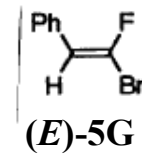

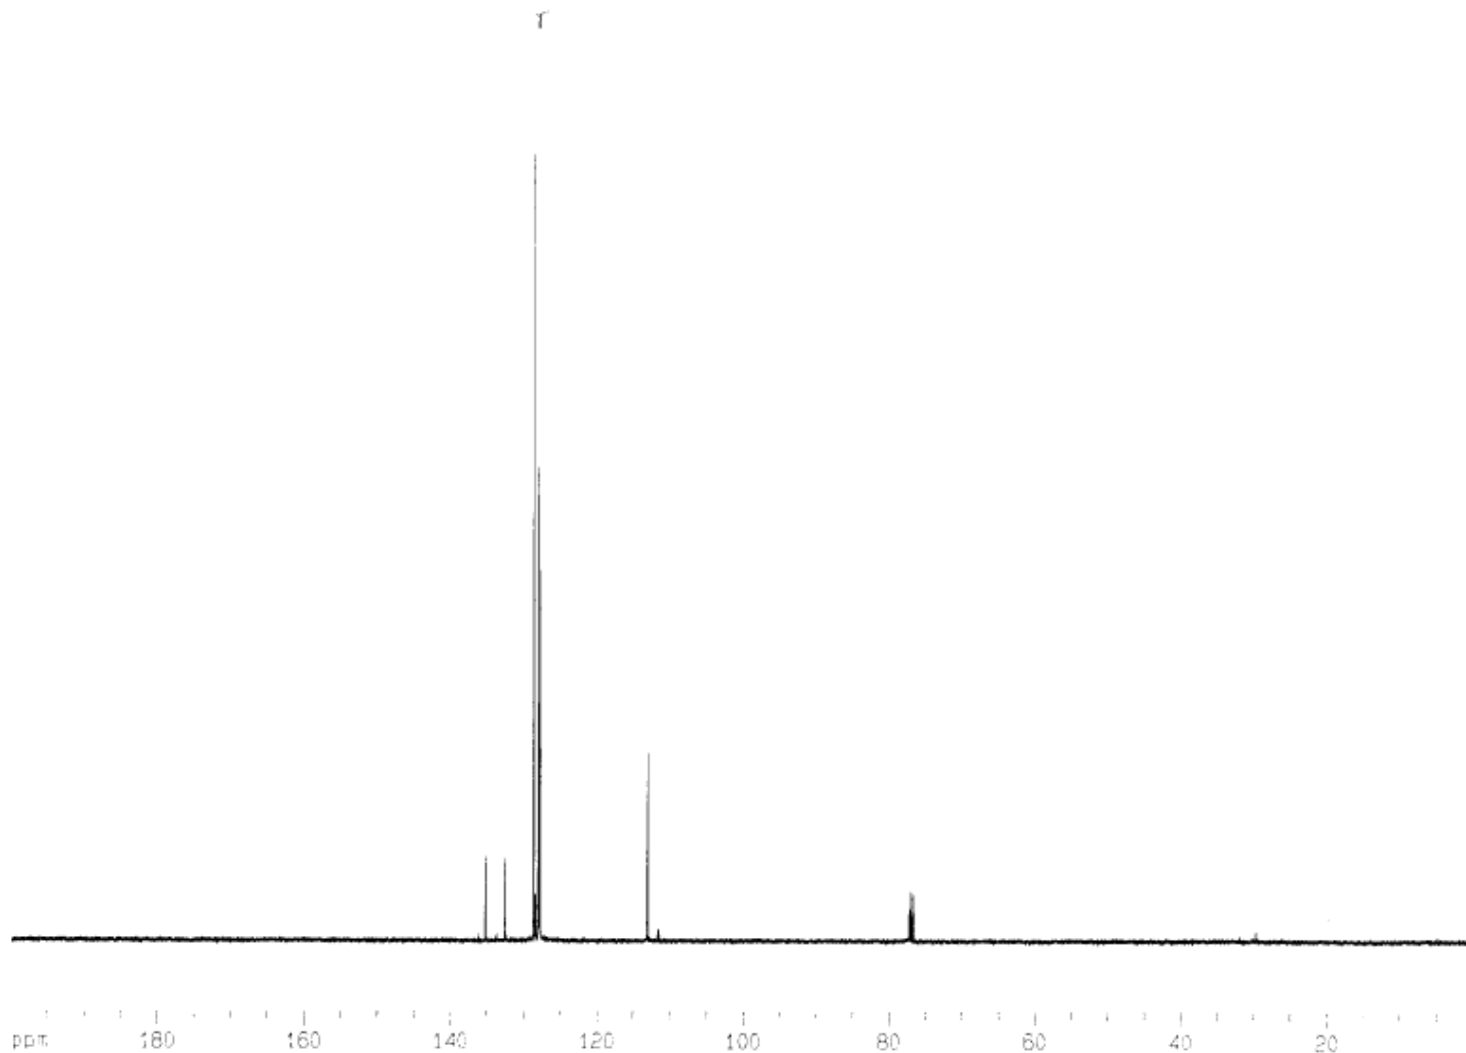

Current Data Parameters  
 NAME hondo-6-8-28  
 EXPNO 2  
 PROCNO 1

F2 - Acquisition Parameters  
 Date\_ 20060828  
 Time 19.30  
 INSTRUM drx500  
 PROBHD 5 mm Multinuc1  
 PULPROG zgpg30  
 TD 65536  
 SOLVENT CDCl3  
 NS 256  
 DS 2  
 SWH 30030.029 Hz  
 FIDRES 0.458222 Hz  
 AQ 1.0912244 sec  
 RG 1290.2  
 DM 16.650 usec  
 DE 6.00 usec  
 TE 301.6 K  
 D1 0.50000000 sec  
 d11 0.03000000 sec  
 MCREST 0.00000000 sec  
 MCKRK 0.01500000 sec

----- CHANNEL f1 -----  
 NUC1 13C  
 P1 11.00 usec  
 PL1 -3.00 dB  
 SF01 125.7703643 MHz

----- CHANNEL f2 -----  
 CPDPRG2 waltz16  
 NUC2 1H  
 PCPD2 100.00 usec  
 PL2 -6.00 dB  
 PL12 17.00 dB  
 PL13 19.00 dB  
 SF02 500.1320005 MHz

F2 - Processing parameters  
 SI 32768  
 SF 125.7577960 MHz  
 WDM EM  
 SSB 0  
 LB 1.00 Hz  
 GB 0  
 PC 1.40

1D NMR plot parameters  
 CX 20.00 cm  
 CY 11.05 cm  
 F1P 199.900 ppm  
 F1 25138.99 Hz  
 F2P -0.100 ppm  
 F2 -12.58 Hz  
 PPMCN 10.00000 ppm/cm  
 HZCM 1257.57800 Hz/cm

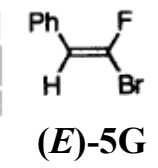

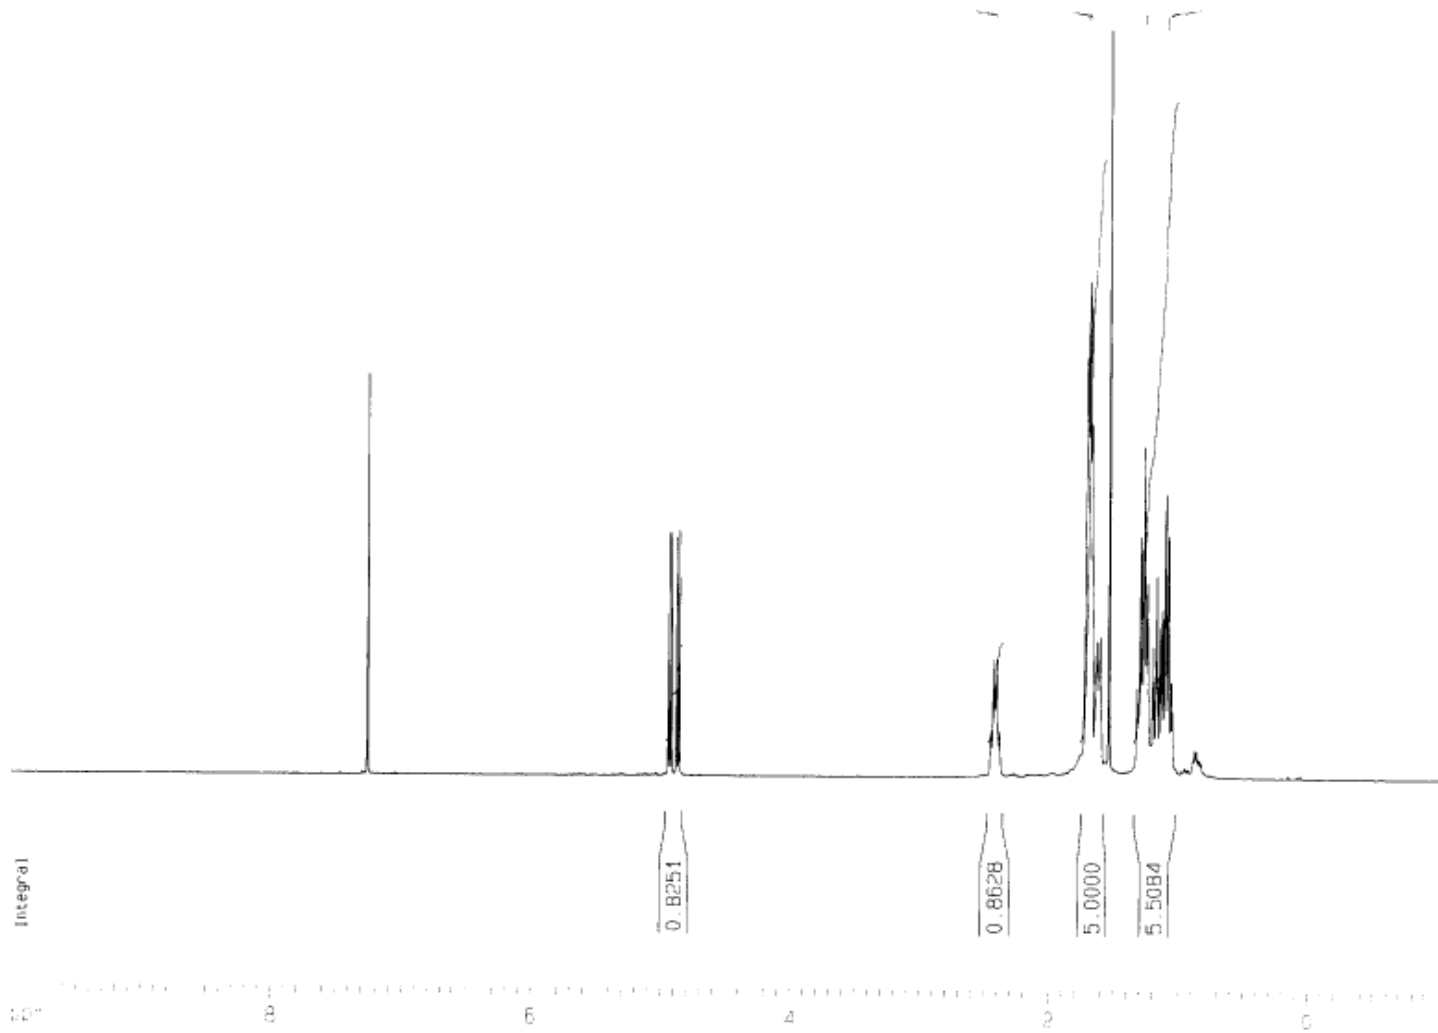

Current Data Parameters  
 NAME Hondo-6-9-6  
 EXPNO 1  
 PROCNO 1

F2 - Acquisition Parameters  
 Date\_ 20060906  
 Time 17.35  
 INSTRUM drx500  
 PROBHD 5 mm Multinuc1  
 PULPROG zg30  
 TD 65536  
 SOLVENT CDCl3  
 NS 16  
 DS 2  
 SWH 10330.578 Hz  
 FIDRES 0.157632 Hz  
 AQ 3.1719923 sec  
 RG 406.4  
 DW 48.400 usec  
 DE 6.00 usec  
 TE 300.5 K  
 D1 1.00000000 sec  
 MCREST 0.00000000 sec  
 MCWRK 0.01500000 sec

==== CHANNEL f1 =====  
 NUC1 1H  
 P1 10.00 usec  
 PL1 -6.00 dB  
 SFO1 500.1330885 MHz

F2 - Processing parameters  
 SI 32768  
 SF 500.1300127 MHz  
 MDW EM  
 SSB 0  
 LB 0.30 Hz  
 GB 0  
 PC 1.00

1D NMR plot parameters  
 CX 20.00 cm  
 CY 10.98 cm  
 F1P 10.000 ppm  
 F1 5001.30 Hz  
 F2P -1.000 ppm  
 F2 -500.13 Hz  
 PPMCM 0.55000 ppm/cm  
 HZCM 275.07150 Hz/cm

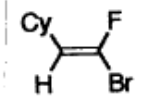

**(E)-5H**

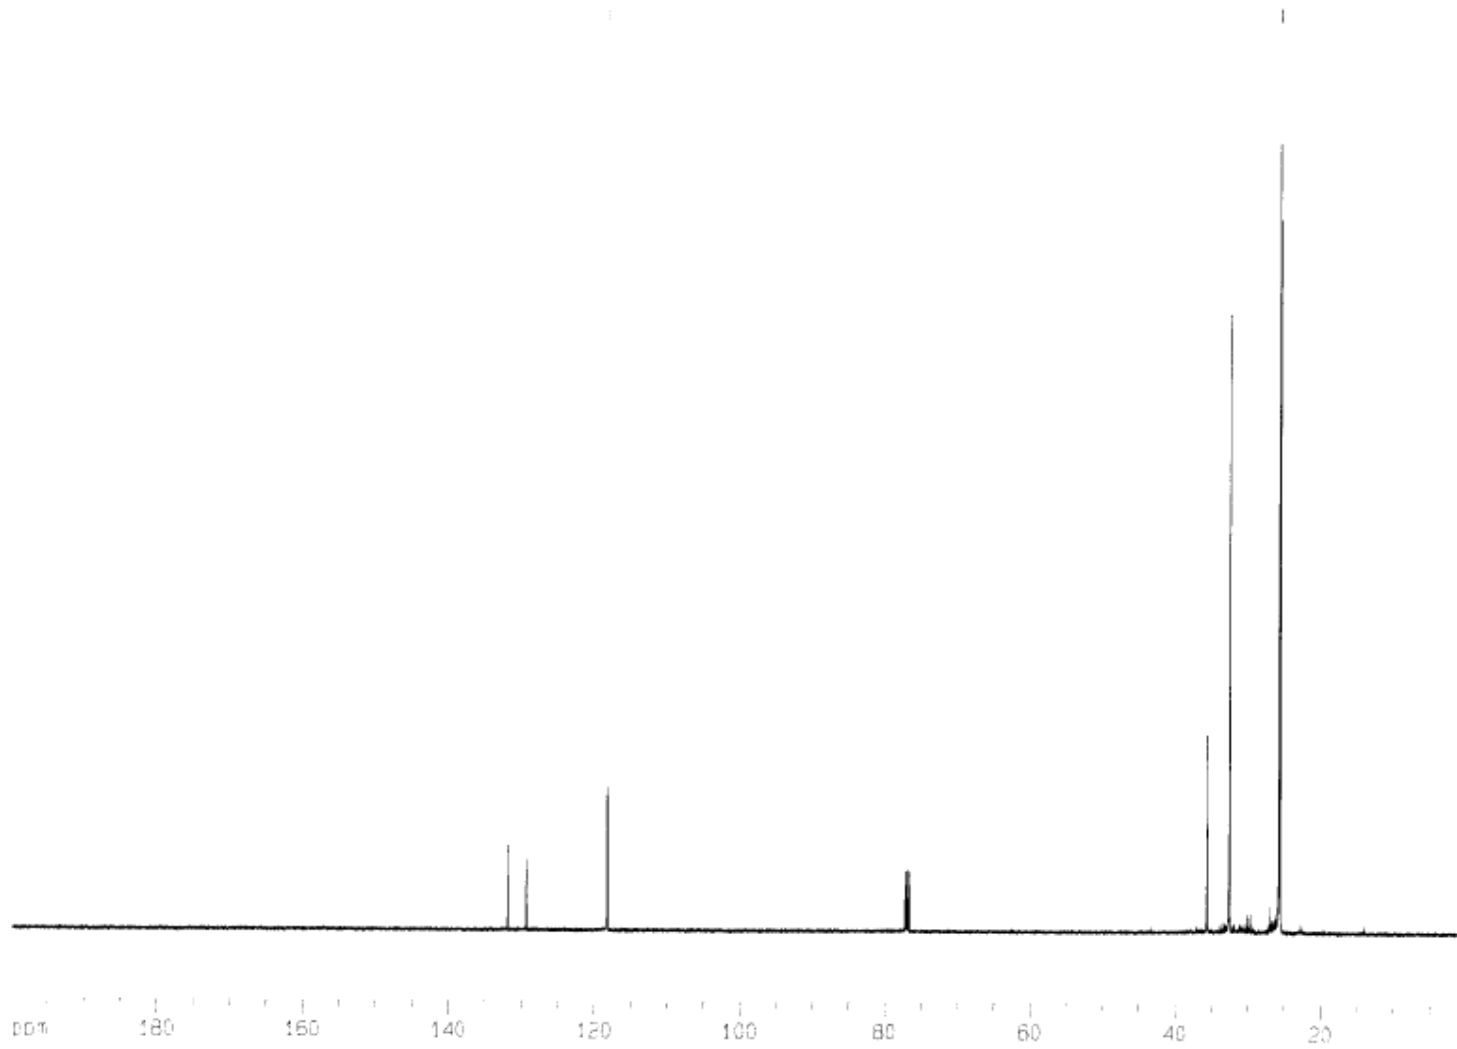

Current Data Parameters  
 NAME Hondo-6-9-6  
 EXPNO 2  
 PROCNO 1

F2 - Acquisition Parameters  
 Date\_ 20060906  
 Time 17.50  
 INSTRUM drx500  
 PROBHD 5 mm Multinuc1  
 PULPROG zgpg30  
 TO 65536  
 SOLVENT CDCl3  
 NS 256  
 DS 2  
 SWH 30030.029 Hz  
 FIDRES 0.458222 Hz  
 AQ 1.0912244 sec  
 RG 1625.5  
 DM 16.650 usec  
 DE 6.00 usec  
 TE 300.9 K  
 D1 0.5000000 sec  
 d11 0.0300000 sec  
 MCREST 0.0000000 sec  
 MCWRK 0.01500000 sec

\*\*\*\*\* CHANNEL f1 \*\*\*\*\*  
 NUC1 13C  
 P1 11.00 usec  
 PL1 -3.00 dB  
 SF01 125.7703643 MHz

\*\*\*\*\* CHANNEL f2 \*\*\*\*\*  
 CPDPRG2 waltz16  
 NUC2 1H  
 PCPD2 100.00 usec  
 PL2 -6.00 dB  
 PL12 17.00 dB  
 PL13 19.00 dB  
 SF02 500.1320005 MHz

F2 - Processing parameters  
 SI 32768  
 SF 125.7577905 MHz  
 MDW EM  
 SSB 0  
 LB 1.00 Hz  
 GB 0  
 PC 1.40

1D NMR plot parameters  
 CX 20.00 cm  
 CY 10.87 cm  
 F1P 199.900 ppm  
 F1 25138.98 Hz  
 F2P -0.100 ppm  
 F2 -12.58 Hz  
 PPMCM 10.00000 ppm/cm  
 HZCM 1257.57788 Hz/cm

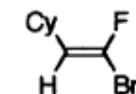

**(E)-5H**

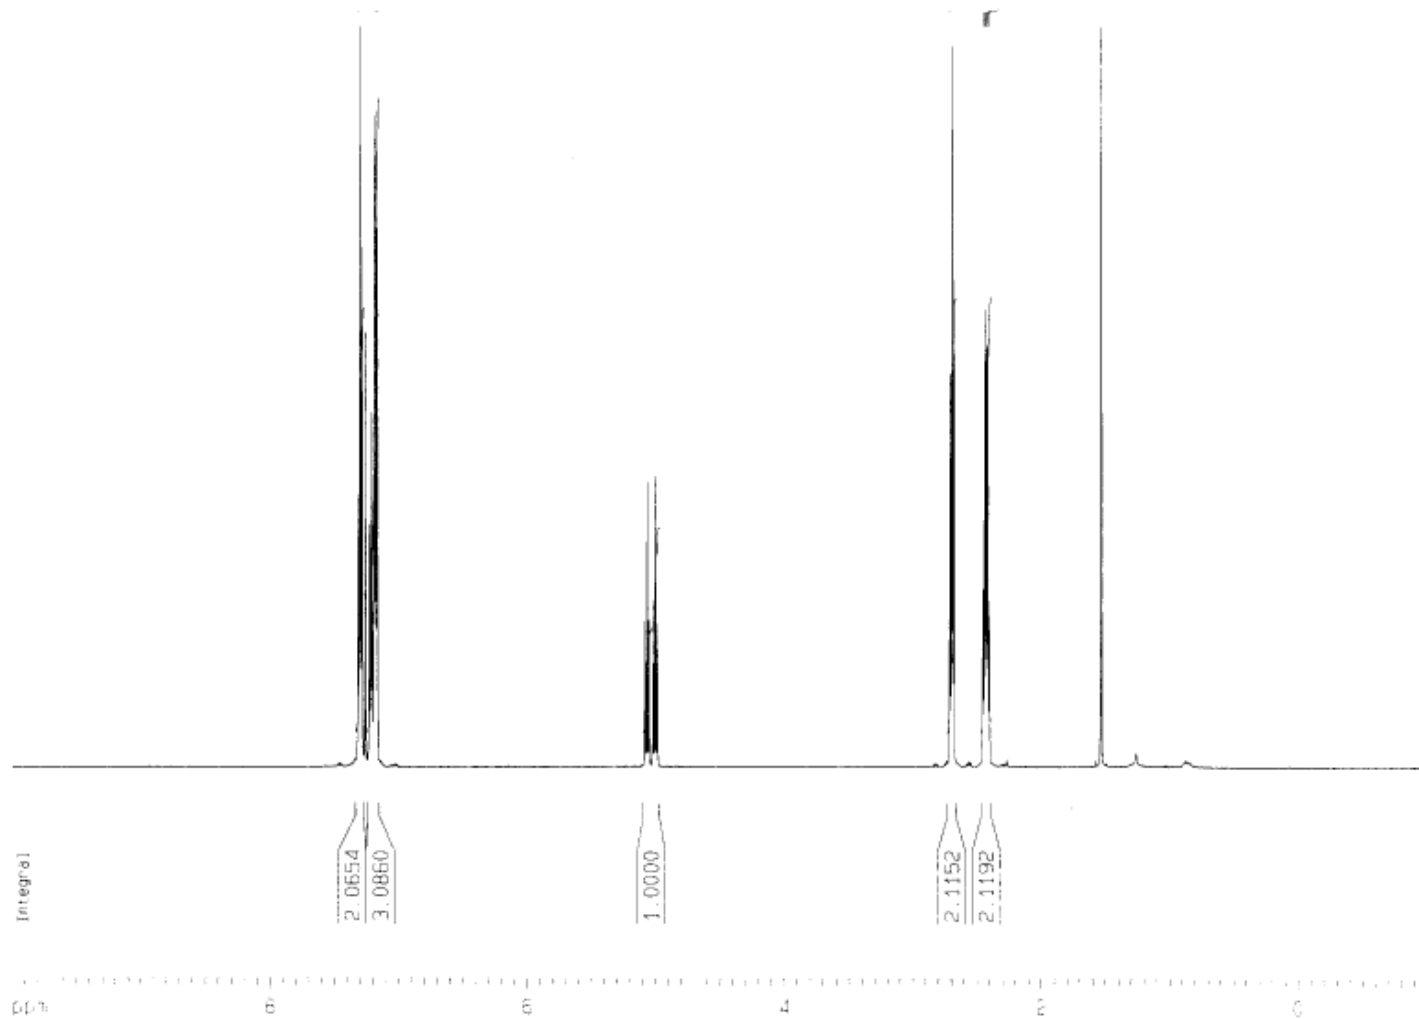

Current Data Parameters  
 NAME hondo-6-9-5  
 EXPNO 2  
 PROCNO 1

F2 - Acquisition Parameters  
 Date\_ 20060905  
 Time 17.04  
 INSTRUM drx500  
 PROBHD 5 mm Multinuc1  
 PULPROG zg30  
 TD 65536  
 SOLVENT CDC13  
 NS 16  
 DS 2  
 SWH 10330.578 Hz  
 FIDRES 0.157632 Hz  
 AQ 3.1719923 sec  
 RG 645.1  
 CW 48.400 usec  
 CE 6.00 usec  
 TE 300.3 K  
 D1 1.0000000 sec  
 MCREST 0.0000000 sec  
 MCWRK 0.0150000 sec

\*\*\*\*\* CHANNEL f1 \*\*\*\*\*  
 NUC1 1H  
 P1 10.00 usec  
 PL1 -6.00 dB  
 SFO1 500.1330885 MHz

F2 - Processing parameters  
 SI 32768  
 SF 500.1300131 MHz  
 WDW EM  
 SSB 0  
 LB 0.30 Hz  
 GB 0  
 PC 1.00

1D NMR plot parameters  
 CX 20.00 cm  
 CY 10.94 cm  
 F1P 10.000 ppm  
 F1 5001.30 Hz  
 F2P -1.000 ppm  
 F2 -500.13 Hz  
 PPMCM 0.55000 ppm/cm  
 HZCM 275.07150 Hz/cm

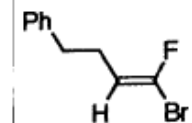

**(E)-5I**

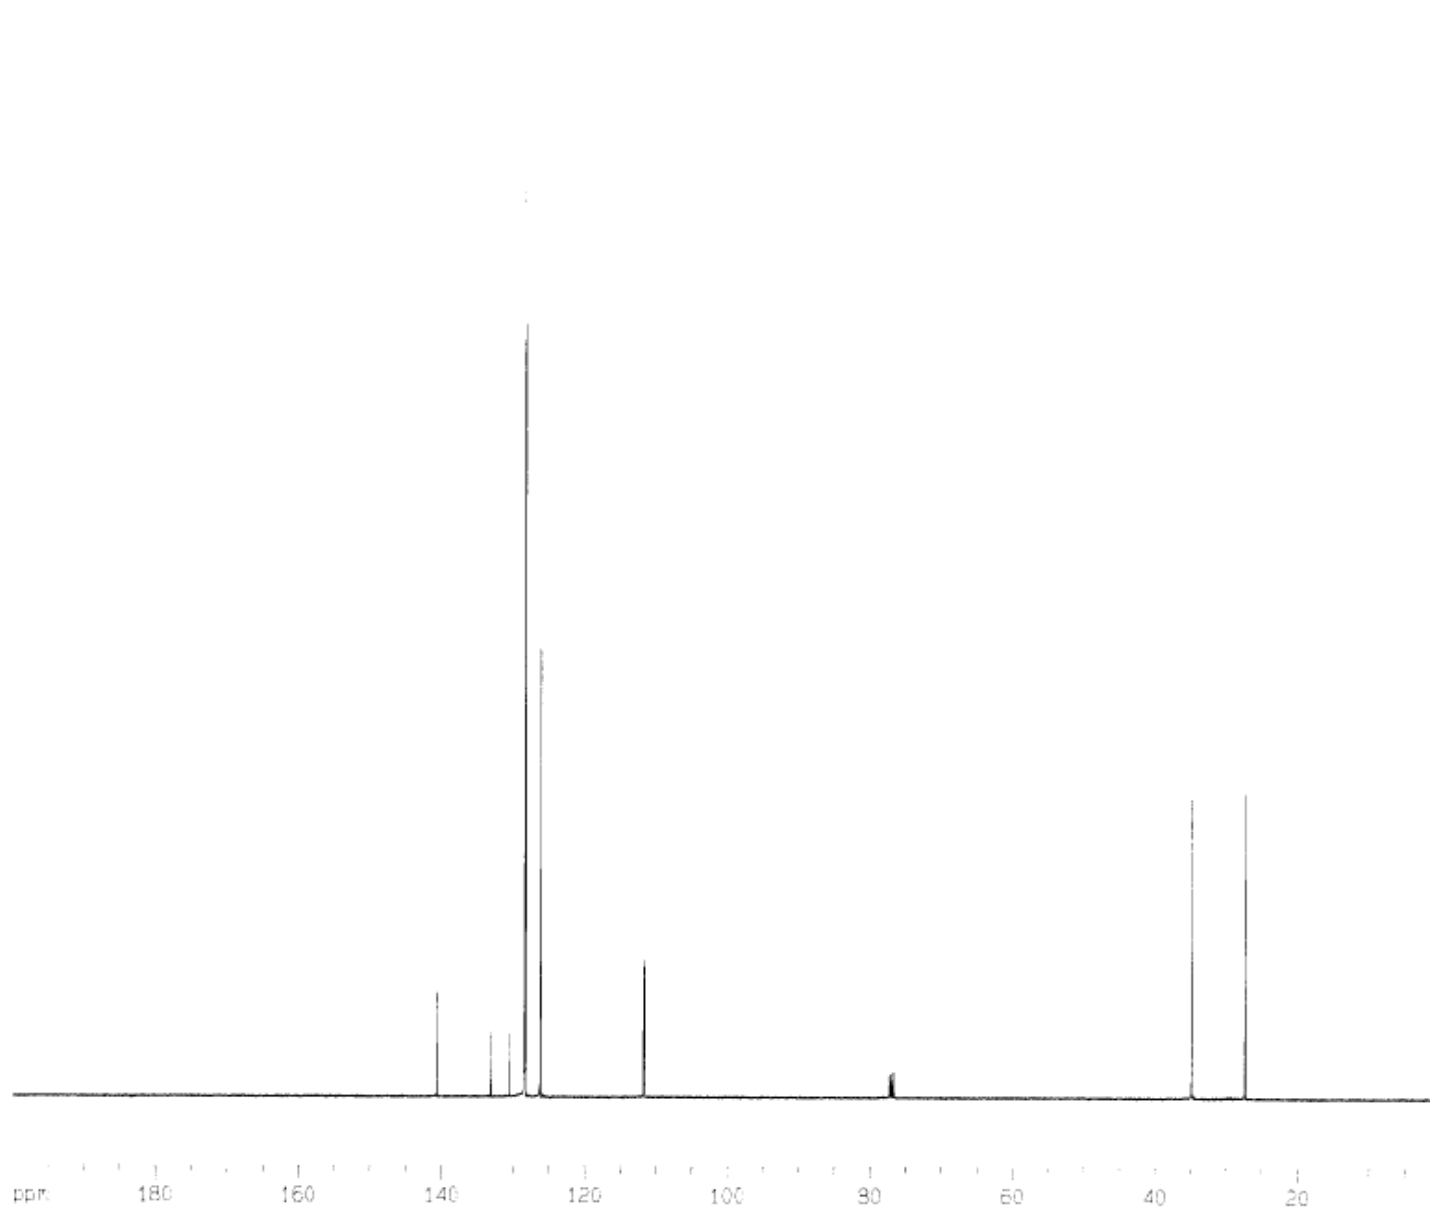

Current Data Parameters  
 NAME honda-6-9-5  
 EXPNO 3  
 PROCNO 1

F2 - Acquisition Parameters  
 Date\_ 20060905  
 Time 17 15  
 INSTRUM drx500  
 PROBHD 5 mm Multinucl  
 PULPROG zgpg30  
 TD 65536  
 SOLVENT CDCl3  
 NS 256  
 DS 2  
 SWH 30030.029 Hz  
 FIDRES 0.458222 Hz  
 AQ 1.0912244 sec  
 RG 3649.1  
 CW 16.650 usec  
 DE 6.00 usec  
 TE 300.6 K  
 D1 0.50000000 sec  
 d11 0.03000000 sec  
 VCREST 0.00000000 sec  
 VCMW 0.01500000 sec

----- CHANNEL f1 -----  
 NUC1 13C  
 P1 11.00 usec  
 PL1 -3.00 dB  
 SFO1 125.7703643 MHz

----- CHANNEL f2 -----  
 CPDPRG2 waltz16  
 NUC2 1H  
 PCPD2 100.00 usec  
 PL2 -6.00 dB  
 PL12 17.00 dB  
 PL13 19.00 dB  
 SFO2 500.1320005 MHz

F2 - Processing parameters  
 SI 32768  
 SF 125.7578042 MHz  
 WDW EM  
 SSB 0  
 LB 1.00 Hz  
 GB 0  
 PC 1.40

1D NMR plot parameters  
 CX 20.00 cm  
 CY 10.83 cm  
 F1P 199.900 ppm  
 F1 25138.98 Hz  
 F2P -0.100 ppm  
 F2 -12.58 Hz  
 PPMCM 10.00000 ppm/cm  
 HZCM 1257.57800 Hz/cm

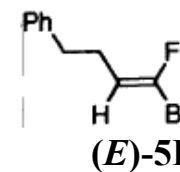



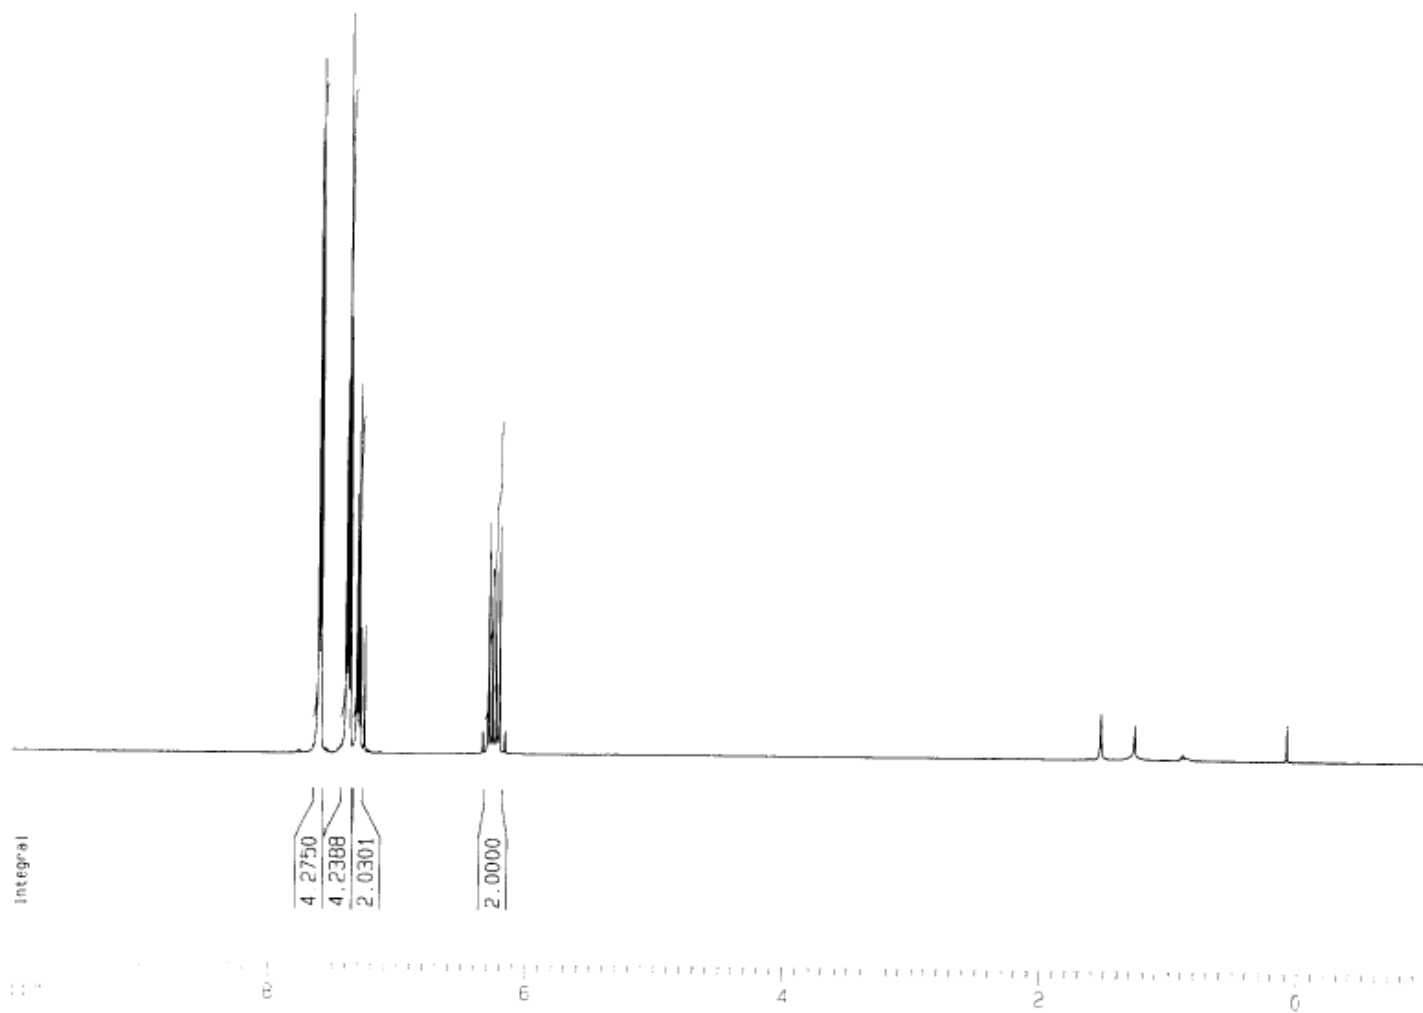

Current Data Parameters  
 NAME hondo-5-9-28  
 EXPNO 1  
 PROCNO 1

F2 - Acquisition Parameters  
 Date\_ 20050928  
 Time 17.44  
 INSTRUM drx500  
 PROBHD 5 mm Multinucl  
 PULPROG zg30  
 TD 65536  
 SOLVENT CDCl3  
 NS 16  
 DS 2  
 SWH 10330.578 Hz  
 FIDRES 0.157632 Hz  
 AQ 3.1719923 sec  
 RG 322.5  
 DM 48.400 usec  
 DE 6.00 usec  
 TE 299.5 K  
 D1 1.00000000 sec  
 MCREST 0.00000000 sec  
 MCWRR 0.01500000 sec

==== CHANNEL f1 =====  
 NUC1 1H  
 P1 10.30 usec  
 PL1 -6.00 dB  
 SFO1 500.1330885 MHz

F2 - Processing parameters  
 SI 32768  
 SF 500.1300131 MHz  
 WDW EM  
 SSB 0  
 LB 0.30 Hz  
 GB 0  
 PC 1.00

1D NMR plot parameters  
 CX 20.00 cm  
 CY 10.61 cm  
 F1P 10.000 ppm  
 F1 5001.30 Hz  
 F2P -1.000 ppm  
 F2 -500.13 Hz  
 PPMCM 0.55000 ppm/cm  
 HZCM 275.07150 Hz/cm

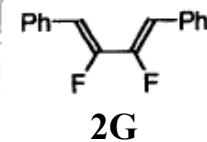

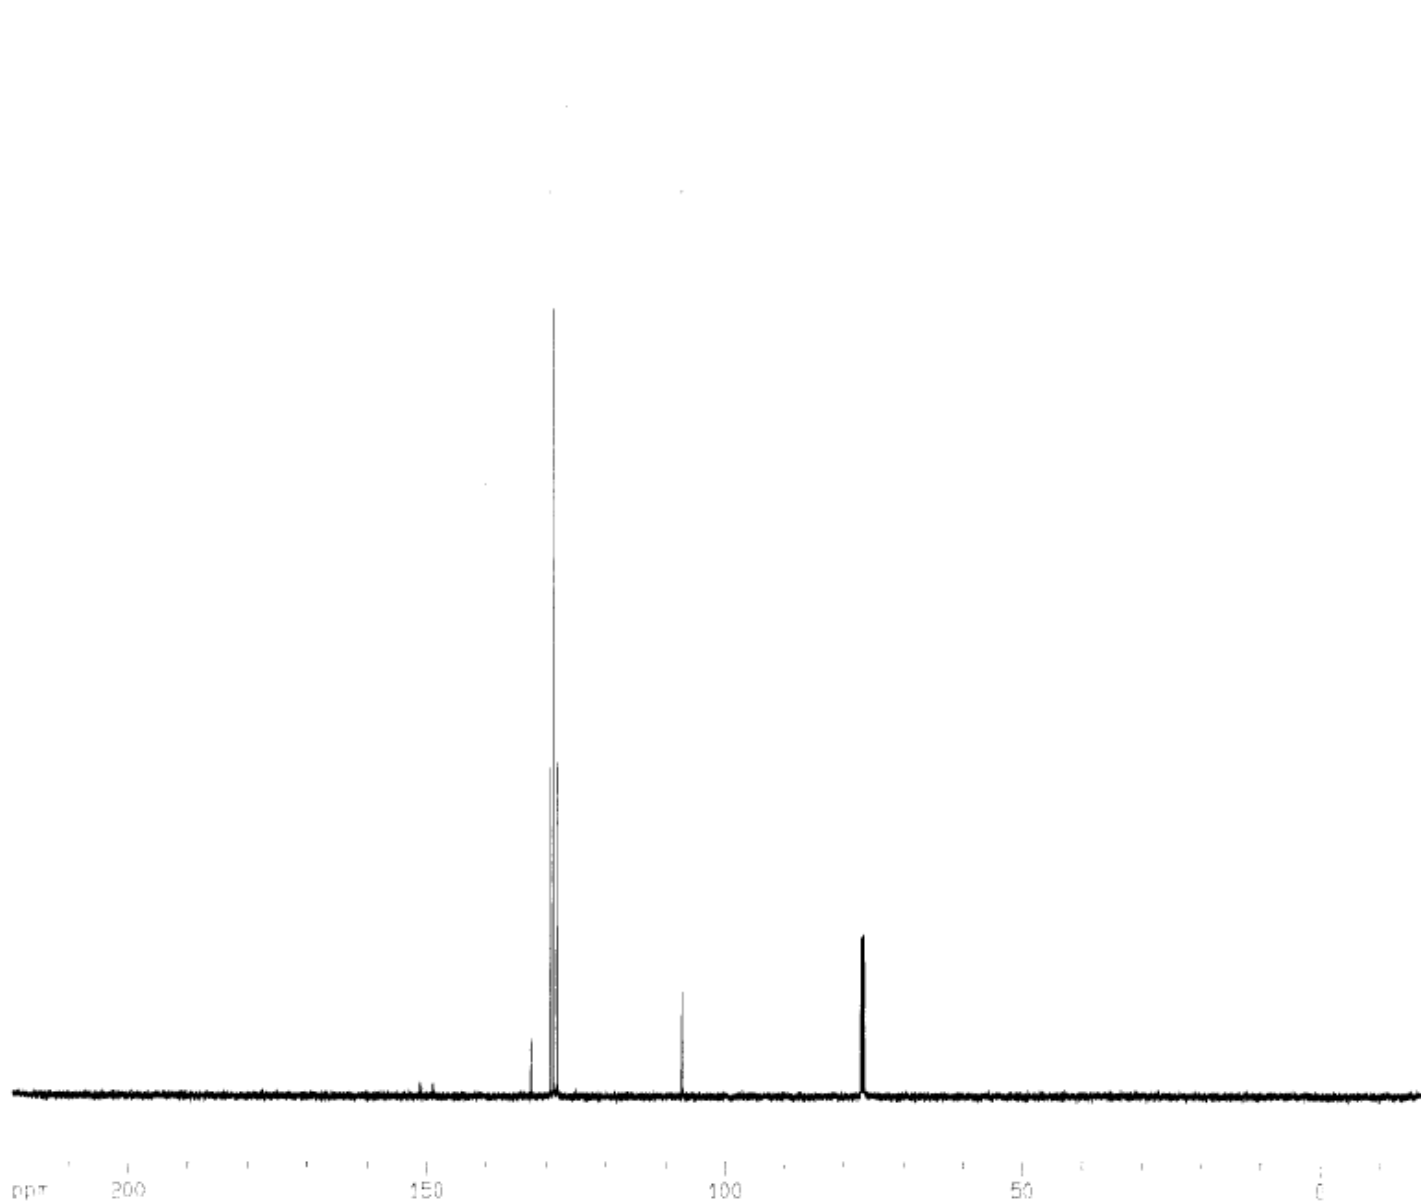

```

Current Data Parameters
NAME      hondo-6-B-28
EXPNO     1
PROCNO    1

F2 - Acquisition Parameters
Date_     20060828
Time      19.19
INSTRUM   drx500
PROBHD    5 mm Multinucl
PULPROG   zgpg30
TD         65536
SOLVENT   CDCl3
NS         256
DS         2
SWH        30030.029 Hz
FIDRES     0.458222 Hz
AQ         1.0912244 sec
RG         3649.1
CW         16.550 usec
DE         6.00 usec
TE         301.5 K
D1         0.50000000 sec
d11        0.03000000 sec
MCREST    0.00000000 sec
MCWRK     0.01500000 sec

===== CHANNEL f1 =====
NUC1       13C
P1         11.00 usec
PL1        -3.00 dB
SFO1       125.7703643 MHz

===== CHANNEL f2 =====
CPDPRG2    waltz16
NUC2       1H
PCPD2      100.00 usec
PL2         -6.00 dB
PL12        17.00 dB
PL13        19.00 dB
SFO2       500.1320005 MHz

F2 - Processing parameters
SI         32768
SF         125.7577932 MHz
WDW        EM
SSB         0
LB          1.00 Hz
GB          0
PC          0.00

1D NMR plot parameters
CX         20.00 cm
CY         11.05 cm
F1P        219.359 ppm
F1         27586.10 Hz
F2P        -19.434 ppm
F2         -2443.93 Hz
PPMCM      11.93963 ppm/cm
HZCM       1501.50146 Hz/cm

```

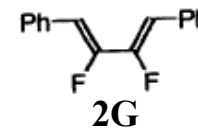

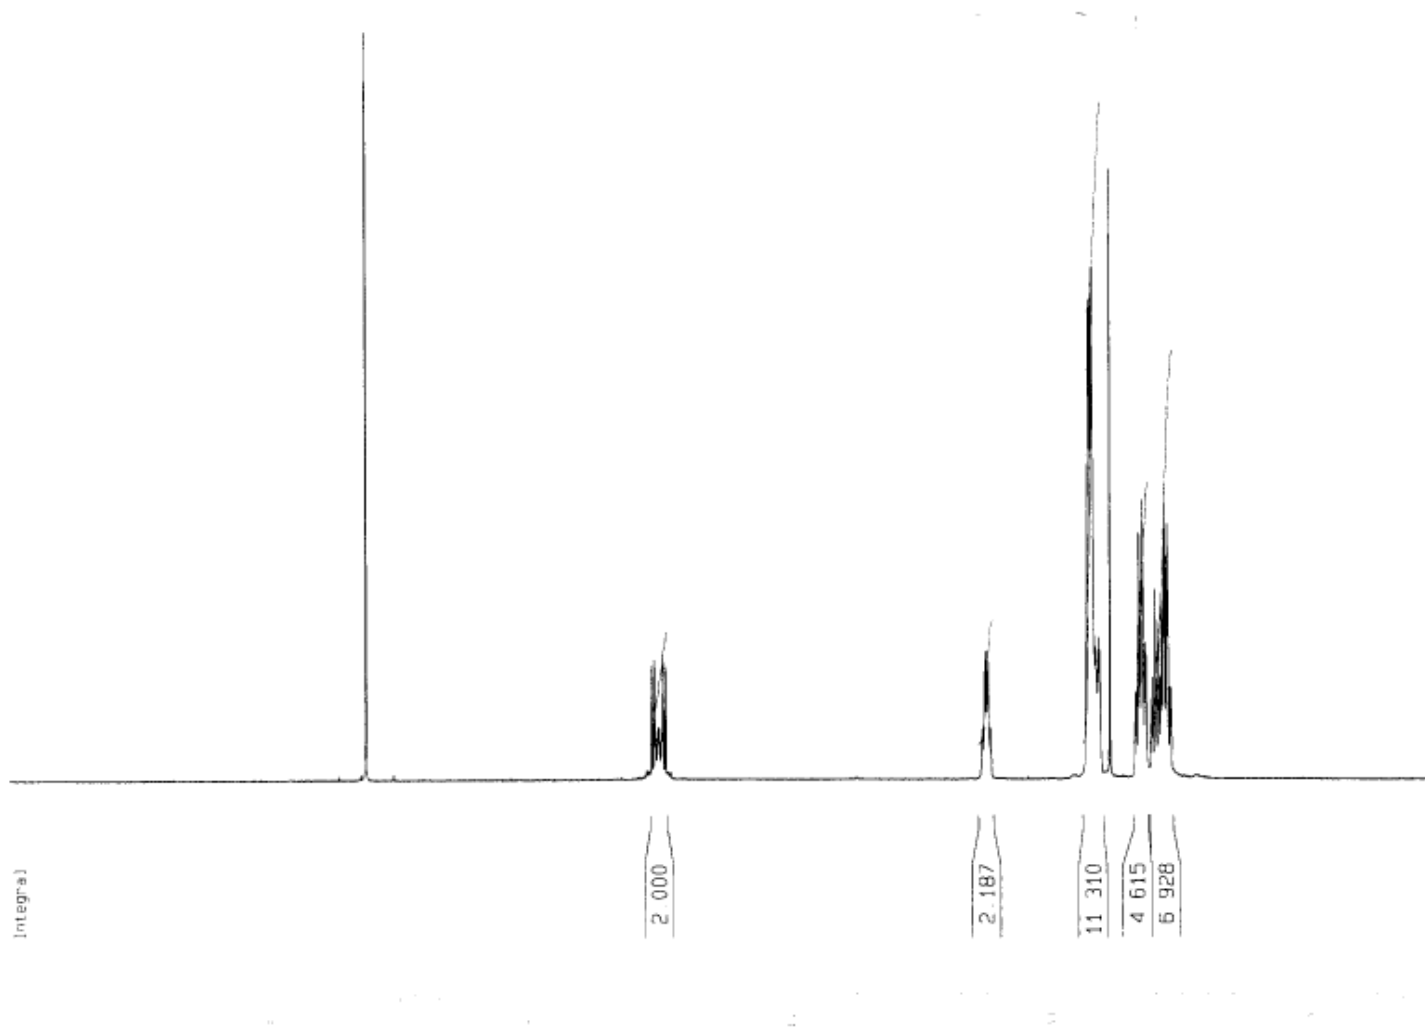

Current Data Parameters  
 NAME Hondo-6-2-7  
 EXPNO 1  
 PROCNO 1

F2 - Acquisition Parameters  
 Date\_ 20060207  
 Time 18.57  
 INSTRUM drx500  
 PROBHD 5 mm Multinucl  
 PULPROG zg30  
 TD 65536  
 SOLVENT CDCl3  
 NS 16  
 DS 2  
 SWH 10330.578 Hz  
 FIDRES 0.157632 Hz  
 AQ 3.1719923 sec  
 RG 645.1  
 DM 48.400 usec  
 DE 6.00 usec  
 TE 294.8 K  
 D1 1.0000000 sec  
 MCREST 0.0000000 sec  
 MCWAK 0.0150000 sec

----- CHANNEL f1 -----  
 NUC1 1H  
 P1 10.30 usec  
 PL1 -6.00 dB  
 SF01 500.1330885 MHz

F2 - Processing parameters  
 SI 32768  
 SF 500.1300134 MHz  
 WDM EM  
 SSB 0  
 LB 0.30 Hz  
 GB 0  
 PC 1.00

1D NMR plot parameters  
 CX 20.00 cm  
 CY 15.18 cm  
 F1P 10.000 ppm  
 F1 5001.30 Hz  
 F2P -1.000 ppm  
 F2 -500.13 Hz  
 PPMCM 0.55000 ppm/cm  
 HZCM 275.07150 Hz/cm

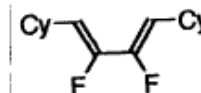

2H

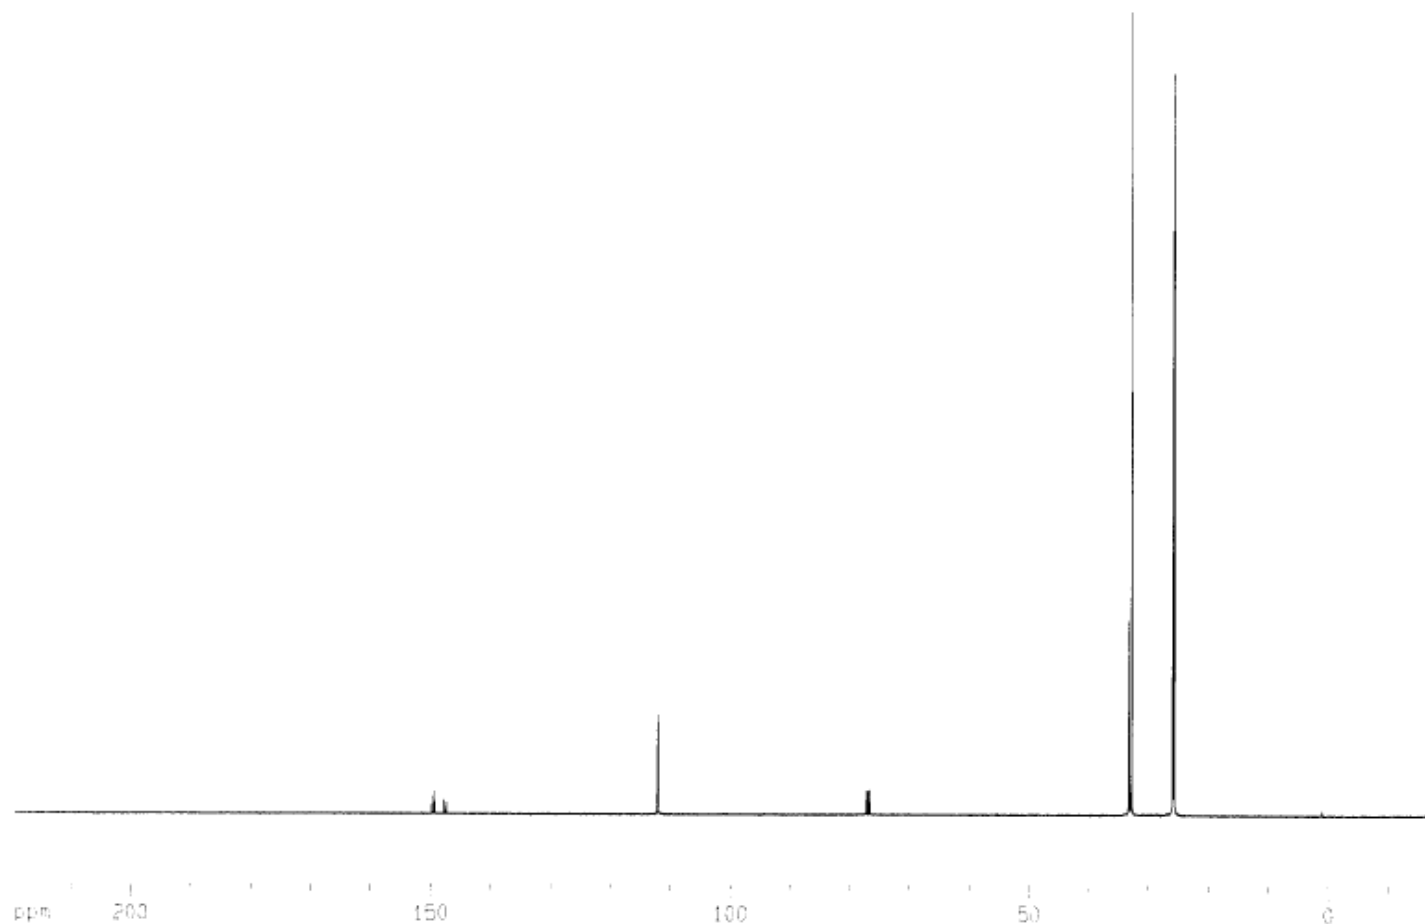

```

Current Data Parameters
NAME      honda-6-9-11
EXPNO     1
PROCNO    1

F2 - Acquisition Parameters
Date_     20060911
Time      20.32
INSTRUM   drx500
PROBHD    5 mm Multinucl
PULPROG   zgpg30
TD         65536
SOLVENT   CDCl3
NS         256
DS         2
SWH        30030.029 Hz
FIDRES     0.458222 Hz
AQ         1.0912244 sec
RG         3649.1
DM         16.650 usec
DE         6.00 usec
TE         304.2 K
D1         0.50000000 sec
d11        0.03000000 sec
MCREST     0.00000000 sec
MCWRK     0.01500000 sec

***** CHANNEL f1 *****
NUC1       13C
P1         11.00 usec
PL1        -3.00 dB
SF01       125.7703643 MHz

***** CHANNEL f2 *****
CPDPRG2    waltz16
NUC2       1H
PCPD2      100.00 usec
PL2         -6.00 dB
PL12        17.00 dB
PL13        19.00 dB
SF02       500.1320005 MHz

F2 - Processing parameters
SI         32768
SF         125.7577866 MHz
WDW        EM
SSB         0
_LB         1.00 Hz
GB          0
PC          1.40

1D NMR plot parameters
CX         20.00 cm
CY         11.27 cm
F1P        219.410 ppm
F1         27592.50 Hz
F2P        -19.383 ppm
F2         -2437.54 Hz
PPMCM      11.93963 ppm/cm
HZCM       1501.50159 Hz/cm

```

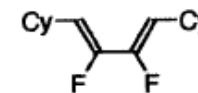

**2H**

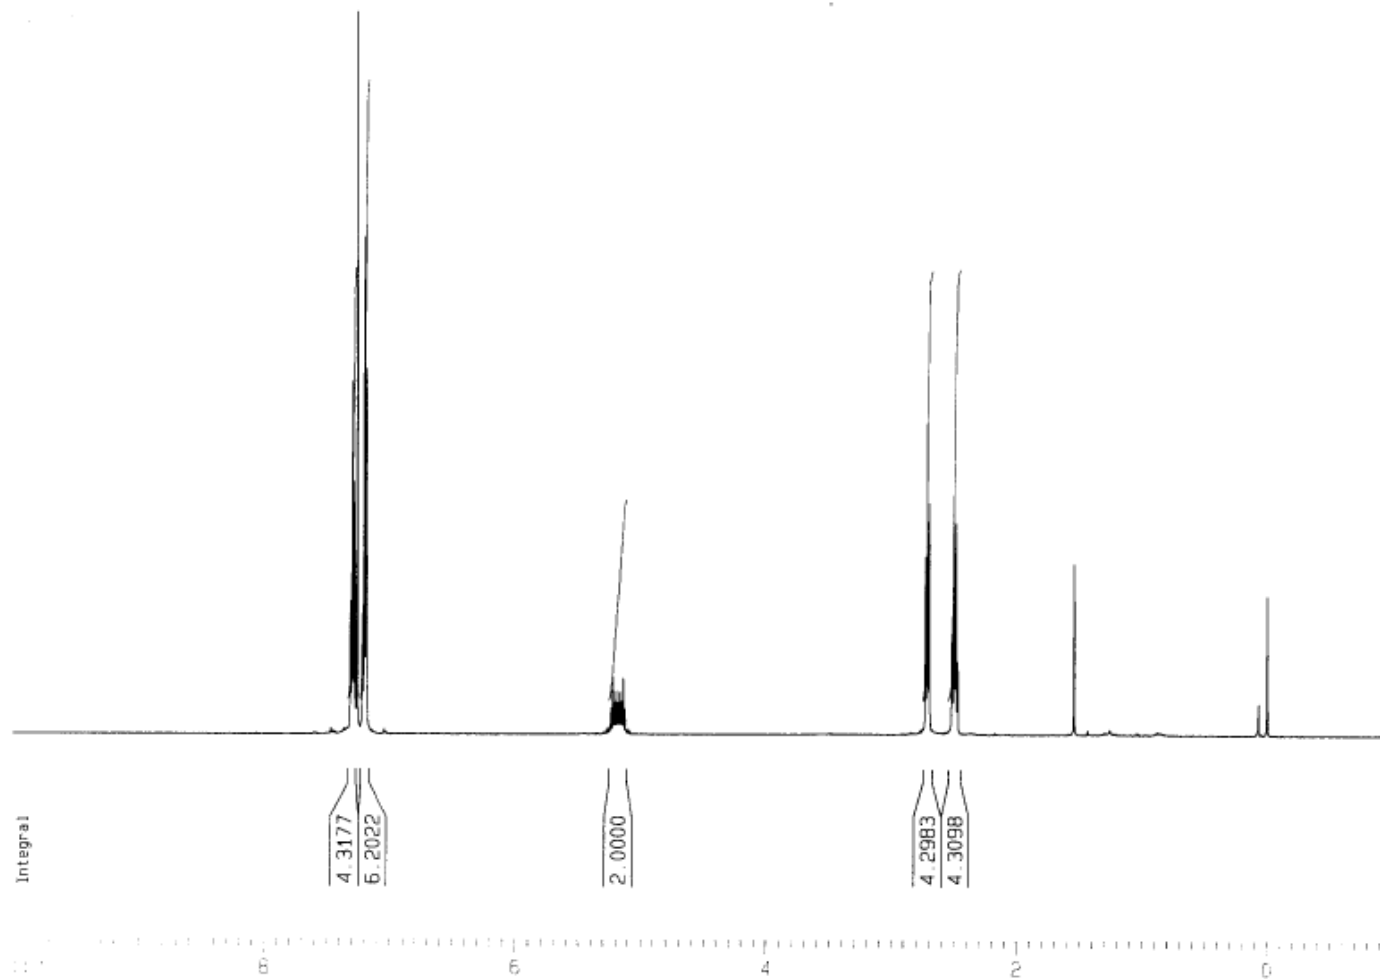

Current Data Parameters  
 NAME hondo-5-12-20  
 EXPNO 2  
 PROCNO 1

F2 - Acquisition Parameters  
 Date\_ 20051220  
 Time 20.06  
 INSTRUM drx500  
 PROBHD 5 mm Multinucl  
 PULPROG zg30  
 TD 65536  
 SOLVENT CDCl3  
 NS 16  
 DS 2  
 SWH 10330.578 Hz  
 FIDRES 0.157632 Hz  
 AQ 3.1719923 sec  
 RG 812.7  
 DW 48.400 usec  
 DE 6.00 usec  
 TE 294.1 K  
 D1 1.00000000 sec  
 MCREST 0.00000000 sec  
 MCWRK 0.01500000 sec

===== CHANNEL f1 =====  
 NUC1 1H  
 P1 10.30 usec  
 PL1 -6.00 dB  
 SFO1 500.1330885 MHz

F2 - Processing parameters  
 SI 32768  
 SF 500.1300137 MHz  
 WDW EM  
 SSB 0  
 LB 0.30 Hz  
 GB 0  
 PC 1.00

1D NMR plot parameters  
 CX 20.00 cm  
 CY 11.08 cm  
 F1P 10.000 ppm  
 F1 5001.30 Hz  
 F2P -1.000 ppm  
 F2 -500.13 Hz  
 PPMCM 0.55000 ppm/cm  
 HZCM 275.07150 Hz/cm

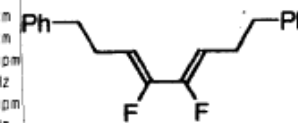

**2I**

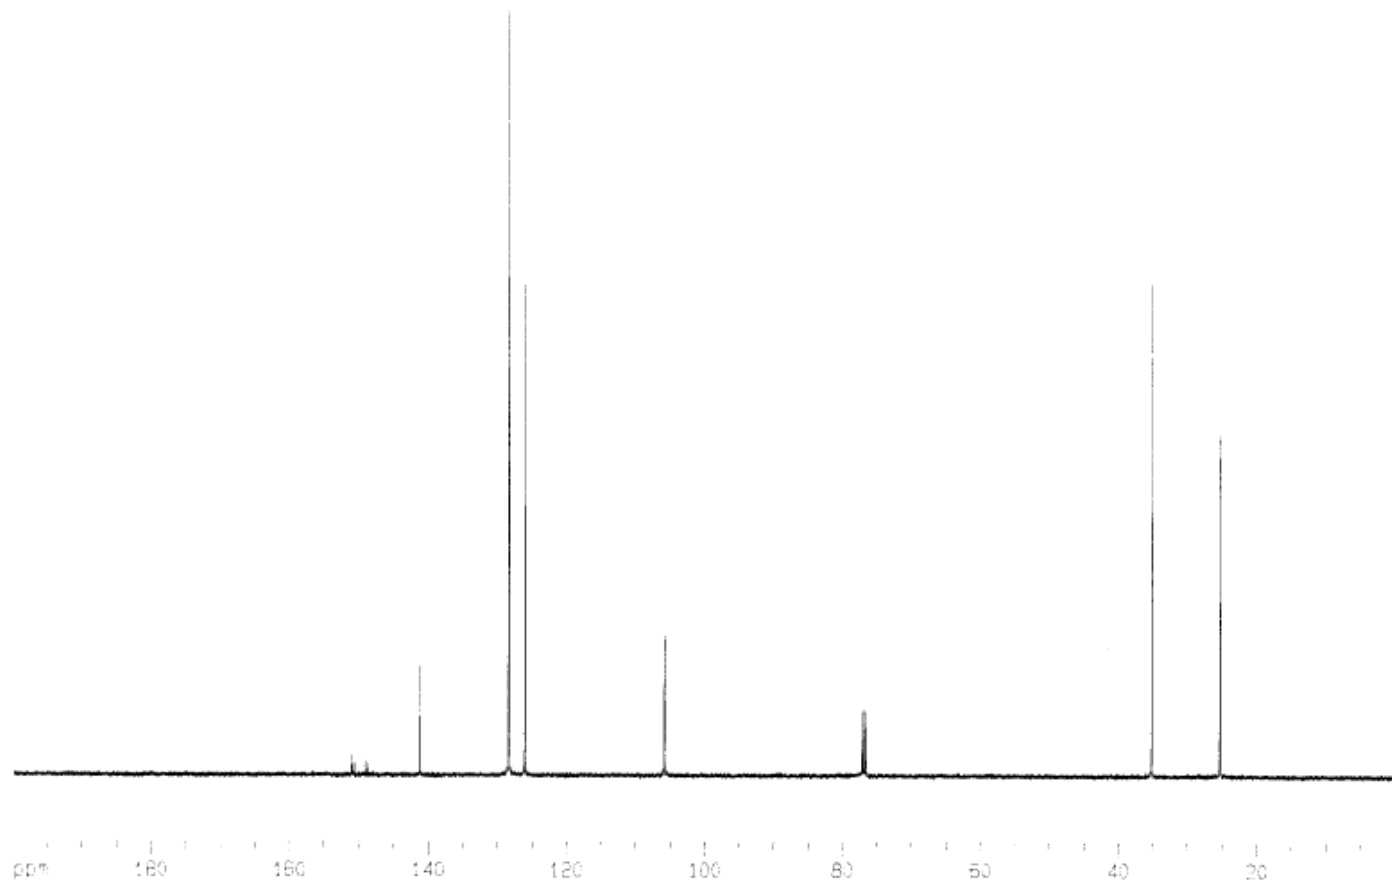

Current Data Parameters  
 NAME honda-6-B-31  
 EXPNO 4  
 PROCNO 1

F2 - Acquisition Parameters  
 Date\_ 20060831  
 Time 18.21  
 INSTRUM drx500  
 PROBHD 5 mm Multinucl  
 PULPROG zgpg30  
 TO 65536  
 SOLVENT CDCl3  
 VS 256  
 DS 2  
 SWH 30030.029 Hz  
 FIDRES 0.458222 Hz  
 AQ 1.0912244 sec  
 RG 1290.2  
 DW 16.650 usec  
 DE 6.00 usec  
 TE 301.0 K  
 D1 0.50000000 sec  
 d11 0.03000000 sec  
 MCREST 0.00000000 sec  
 MCWRK 0.01500000 sec

----- CHANNEL f1 -----  
 NUC1 13C  
 P1 11.00 usec  
 PL1 -3.00 dB  
 SFO1 125.7703643 MHz

----- CHANNEL f2 -----  
 CPDPRG2 waltz16  
 NUC2 1H  
 PCPD2 100.00 usec  
 PL2 -6.00 dB  
 PL12 17.00 dB  
 PL13 19.00 dB  
 SFO2 500.1320005 MHz

F2 - Processing parameters  
 SI 32768  
 SF 125.7577978 MHz  
 wDK EM  
 SSB 0  
 LB 1.00 Hz  
 GB 0  
 PC 1.40

1D NMR plot parameters  
 CX 20.00 cm  
 CY 11.28 cm  
 F1P 199.900 ppm  
 F1 25138.98 Hz  
 F2P -0.100 ppm  
 F2 -12.58 Hz  
 FPMCM 10.00000 ppm/cm  
 FZCM 1257.57800 Hz/cm

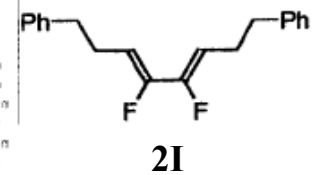

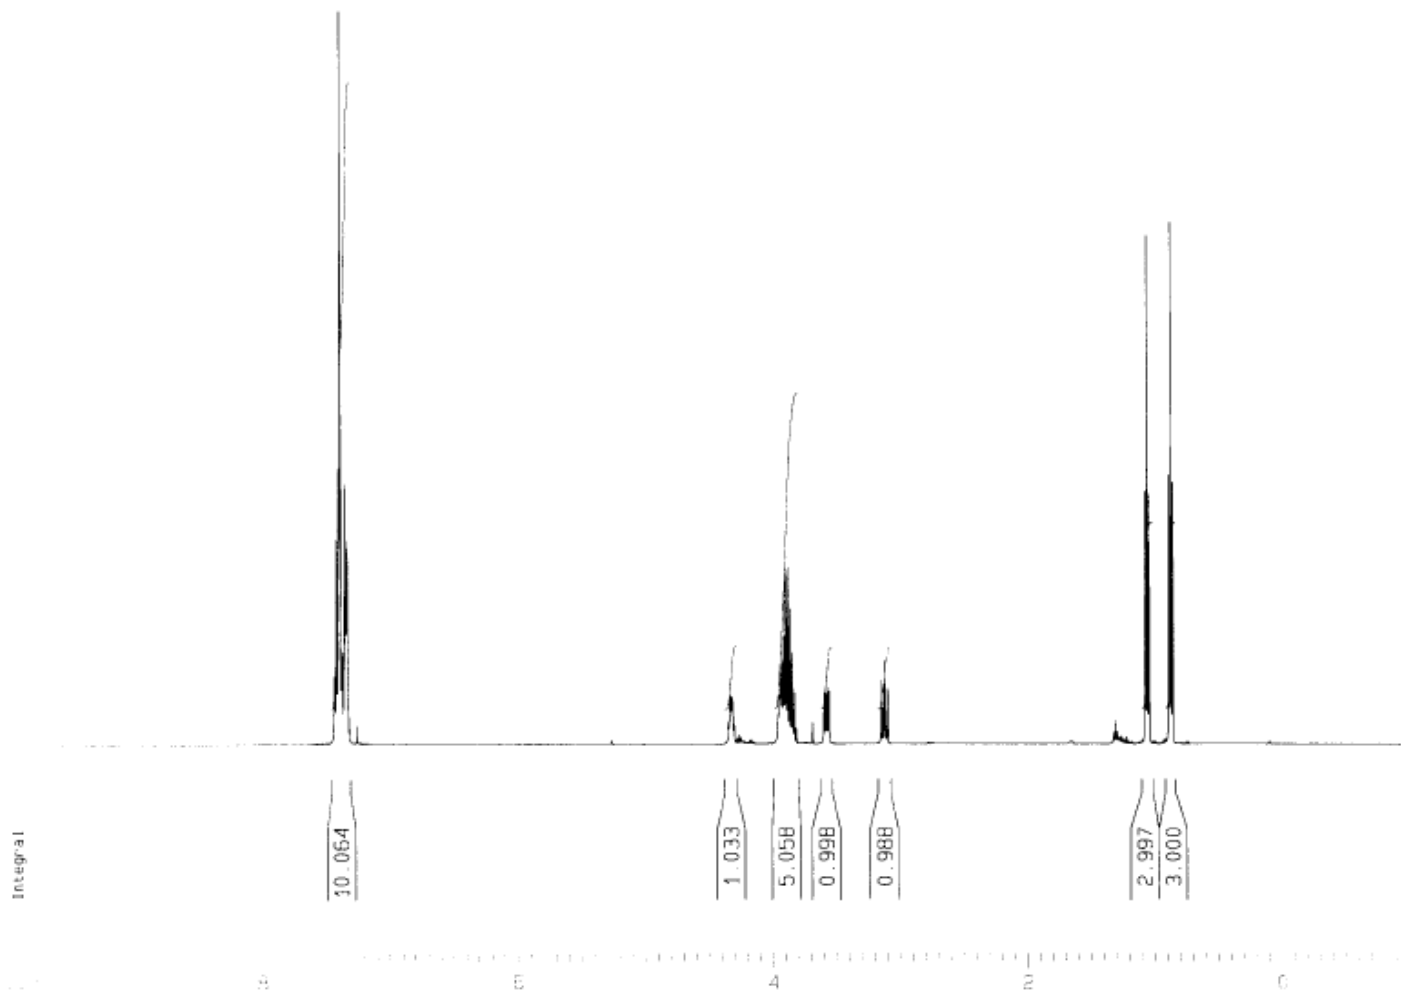

Current Data Parameters  
 NAME hondo-5-11-23  
 EXPNO 3  
 PROCNO 1

F2 - Acquisition Parameters  
 Date\_ 20051123  
 Time 20.50  
 INSTRUM drx500  
 PROBHD 5 mm Multinucl  
 PULPROG zg30  
 FD 65536  
 SOLVENT CDCl3  
 NS 16  
 DS 2  
 SWH 10330.578 Hz  
 FIDRES 0.157632 Hz  
 AQ 3.1719923 sec  
 RG 45.3  
 DW 48.400 usec  
 DE 6.00 usec  
 TE 296.6 K  
 D1 1.00000000 sec  
 MCREST 0.00000000 sec  
 MCWRK 0.01500000 sec

\*\*\*\*\* CHANNEL f1 \*\*\*\*\*  
 NUC1 1H  
 P1 10.30 usec  
 PL1 -6.00 dB  
 SFO1 500.1330885 MHz

F2 - Processing parameters  
 SI 32768  
 SF 500.1300124 MHz  
 WDW EM  
 SSB 0  
 LB 0.30 Hz  
 GB 0  
 PC 1.00

1D NMR plot parameters  
 CX 20.00 cm  
 CY 10.77 cm  
 F1P 10.000 ppm  
 F1 5001.30 Hz  
 F2P -1.000 ppm  
 F2 -500.13 Hz  
 PPMCM 0.55000 ppm/cm  
 HZCM 275.07150 Hz/cm

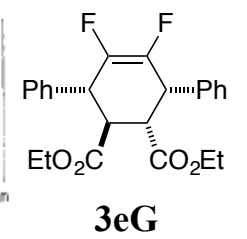

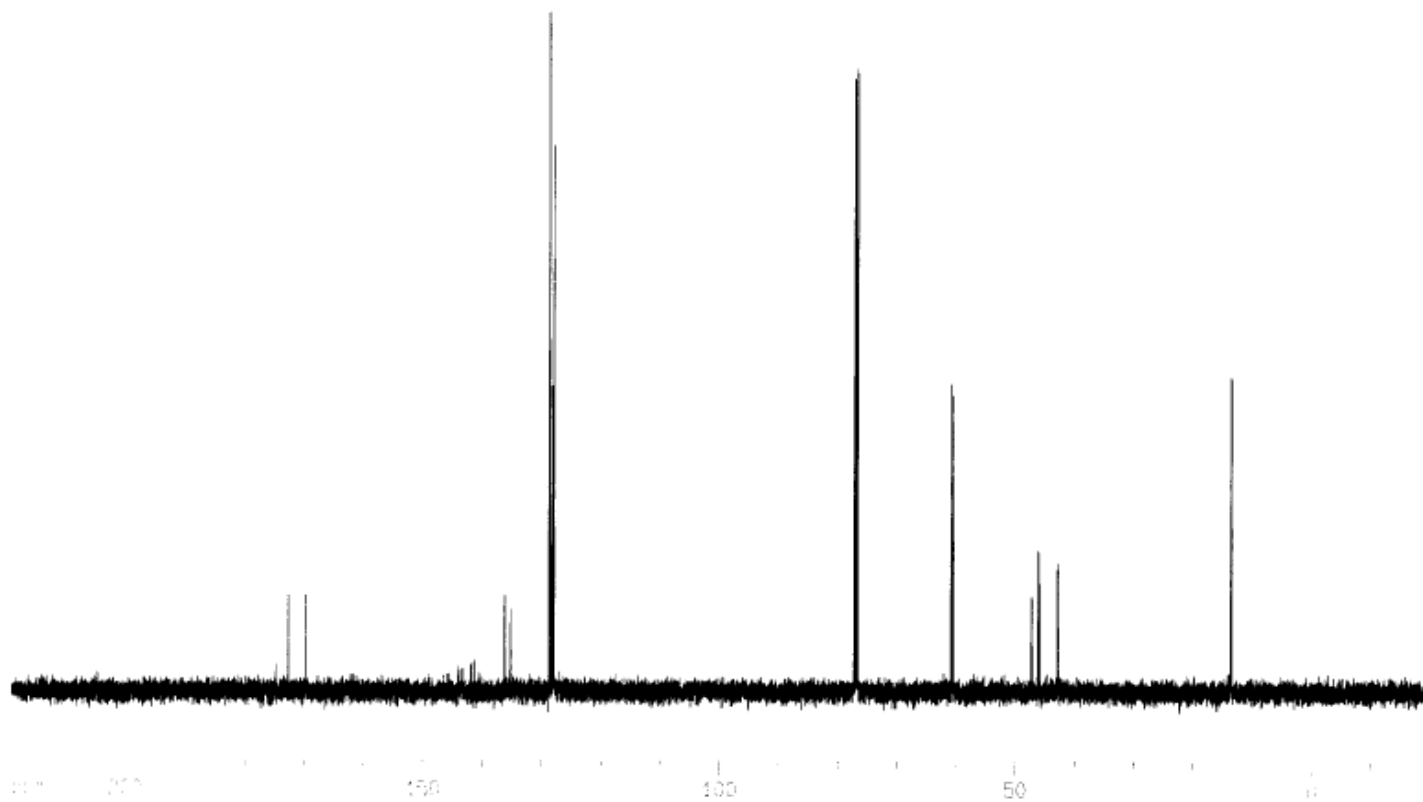

Current Data Parameters  
 NAME hondo-5-11-23  
 EXPNO 4  
 PROCNO 1

F2 - Acquisition Parameters  
 Date\_ 20051123  
 Time 21.06  
 INSTRUM dx500  
 PROBHD 5 mm Multinucl  
 PULPROG zgpg30  
 TD 65536  
 SOLVENT CDCl3  
 NS 256  
 DS 2  
 SMH 30030.029 Hz  
 FIDRES 0.458222 Hz  
 AQ 1.0912244 sec  
 RG 3649.1  
 DW 16.650 usec  
 DE 6.00 usec  
 TE 297.3 K  
 D1 0.5000000 sec  
 d11 0.0300000 sec  
 MCREST 0.0000000 sec  
 MCWRR 0.0150000 sec

----- CHANNEL f1 -----  
 NUC1 13C  
 P1 5.70 usec  
 PL1 -2.00 dB  
 SFO1 125.7703643 MHz

----- CHANNEL f2 -----  
 CPDPRG2 wa1tz15  
 NUC2 1H  
 PCPD2 100.00 usec  
 PL2 -6.00 dB  
 PL12 13.74 dB  
 PL13 13.74 dB  
 SFO2 500.1320005 MHz

F2 - Processing parameters  
 SI 32768  
 SF 125.7578033 MHz  
 WDM EM  
 SSB 0  
 LB 1.00 Hz  
 GB 0  
 PC 0.10

1D NMR plot parameters  
 CX 20.00 cm  
 CY 9.62 cm  
 F1P 219.279 ppm  
 F1 27575.99 Hz  
 F2P -19.514 ppm  
 F2 -2454.04 Hz  
 PPMCM 11.93963 ppm/cm  
 HZCM 1501.50159 Hz/cm

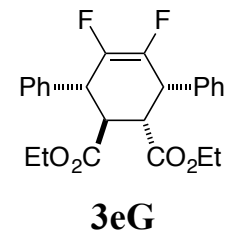



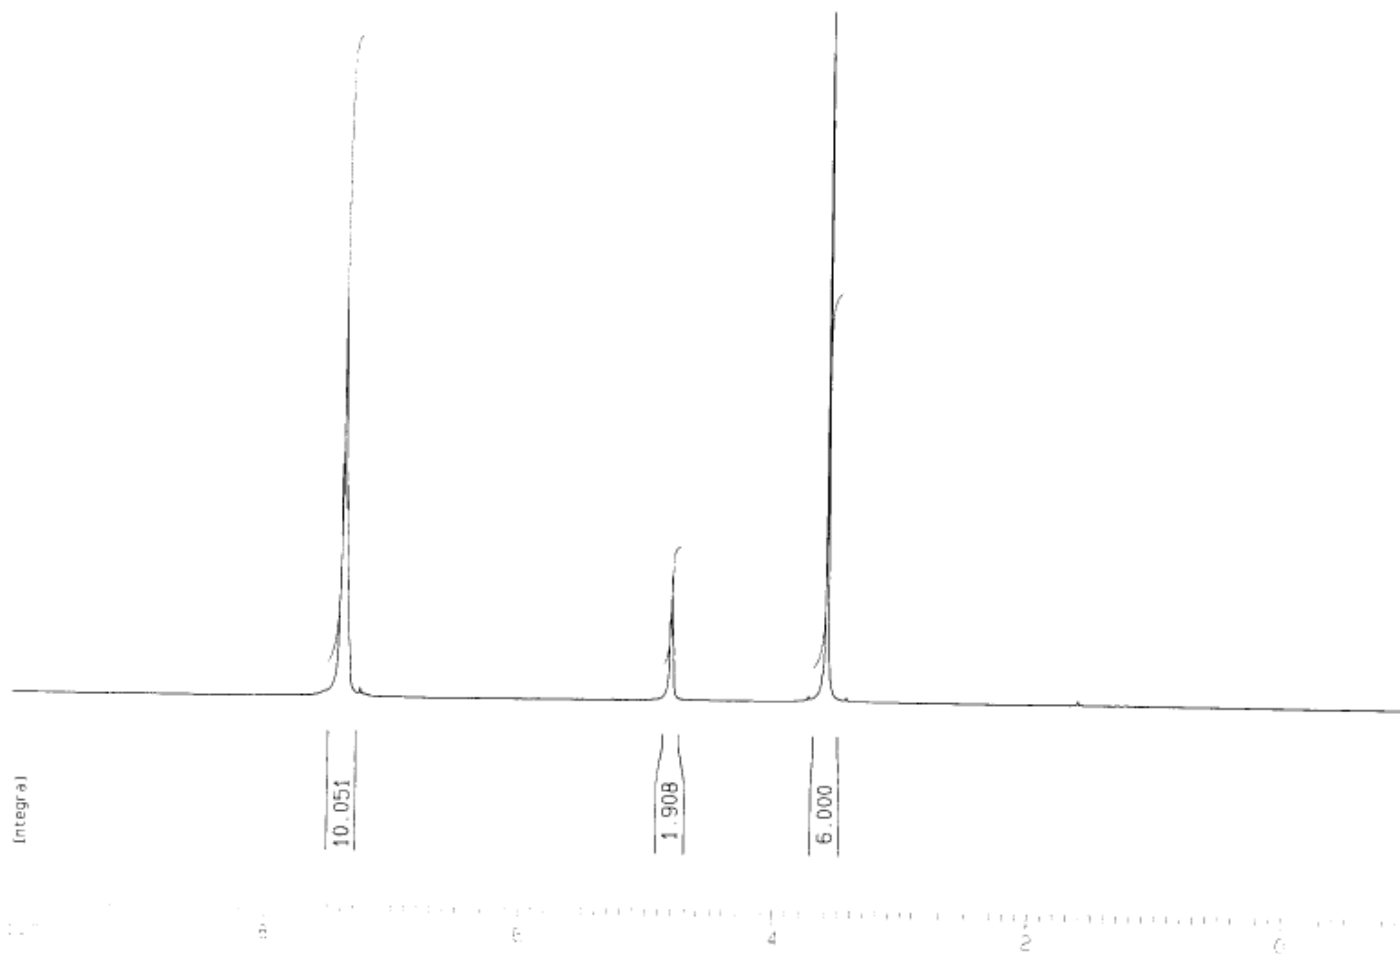

Current Data Parameters  
 NAME hondo-5-11-30  
 EXPNO 1  
 PROCNO 1

F2 - Acquisition Parameters  
 Date\_ 20051130  
 Time 21.35  
 INSTRUM drx500  
 PROBHD 5 mm Multinucl  
 PULPROG zg30  
 TD 65536  
 SOLVENT CDC13  
 NS 16  
 DS 2  
 SWH 10330.578 Hz  
 FIDRES 0.157632 Hz  
 AQ 3.1719923 sec  
 RG 57  
 DW 48.400 usec  
 DE 6.00 usec  
 TE 297.1 K  
 D1 1.00000000 sec  
 MCREST 0.00000000 sec  
 MCWRK 0.01500000 sec

==== CHANNEL f1 =====  
 NUC1 1H  
 P1 10.30 usec  
 PL1 -5.00 dB  
 SFO1 500.1330885 MHz

F2 - Processing parameters  
 SI 32768  
 SF 500.1300121 MHz  
 HDW EM  
 SSB 0  
 LB 0.30 Hz  
 GB 0  
 PC 1.00

1D NMR plot parameters  
 CX 20.00 cm  
 CY 9.92 cm  
 F1P 10.000 ppm  
 F1 5001.30 Hz  
 F2P -1.000 ppm  
 F2 -500.13 Hz  
 PPMCM 0.55000 ppm/cm  
 HZCM 275.07150 Hz/cm

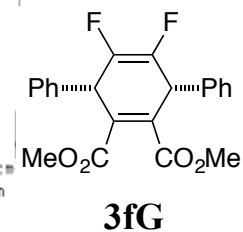

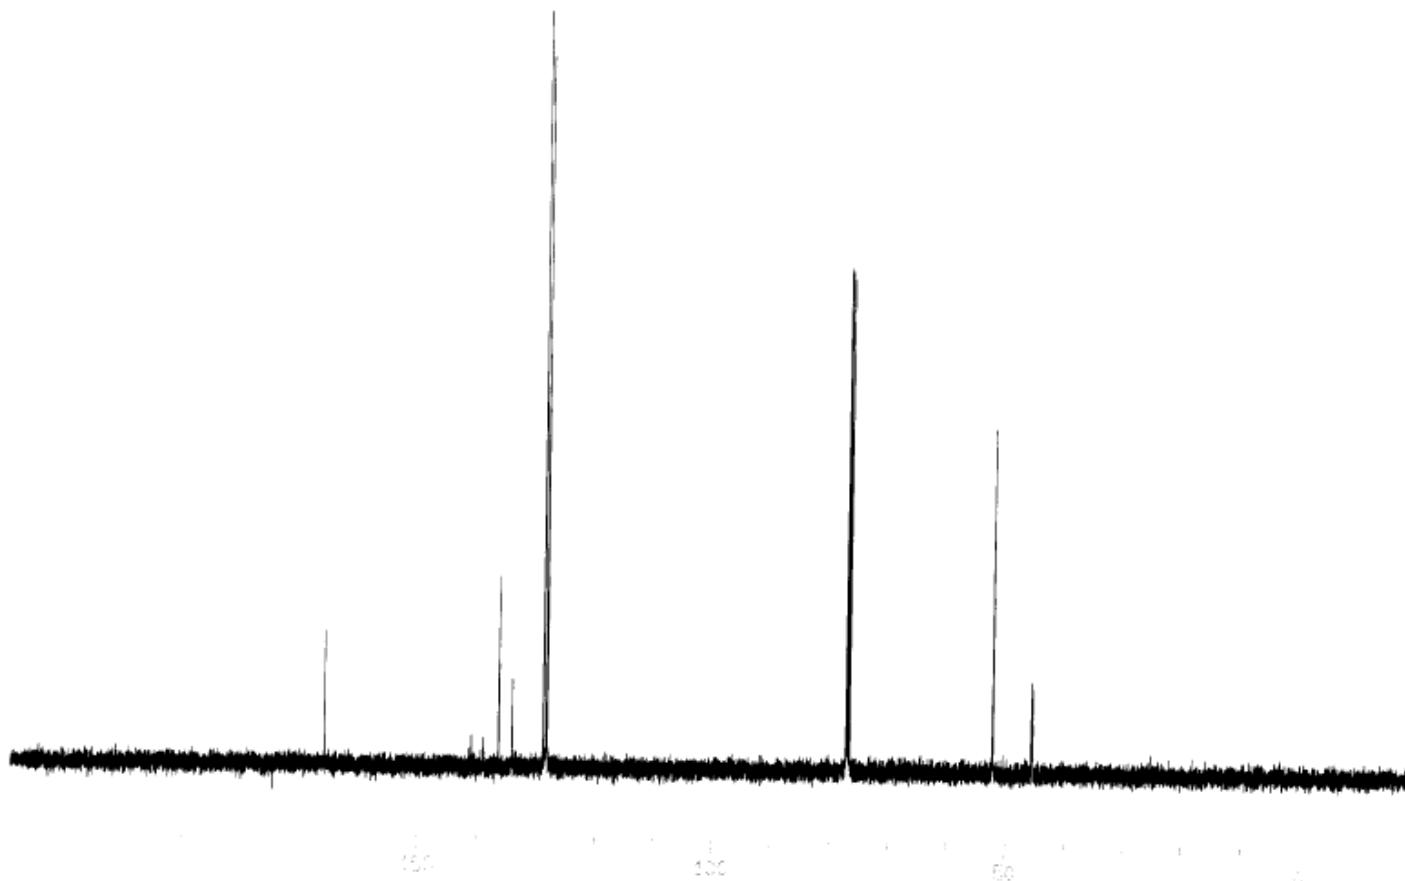

Current Data Parameters  
 NAME hondo-5-11-30  
 EXPNO 2  
 PROCNO 1

F2 - Acquisition Parameters  
 Date\_ 20051130  
 Time 21.48  
 INSTRUM drx500  
 PROBHD 5 mm Multinuc1  
 PULPROG zgpg30  
 TD 65536  
 SOLVENT CDCl3  
 NS 256  
 DS 2  
 SWH 30030.029 Hz  
 FIDRES 0.458222 Hz  
 AQ 1.0912244 sec  
 RG 4096  
 DW 16.650 usec  
 DE 6.00 usec  
 TE 297.9 K  
 D1 0.5000000 sec  
 d11 0.0300000 sec  
 MCREST 0.0000000 sec  
 MCWRX 0.0150000 sec

\*\*\*\*\* CHANNEL f1 \*\*\*\*\*  
 NUC1 13C  
 P1 5.70 usec  
 PL1 -2.00 dB  
 SFO1 125.7703643 MHz

\*\*\*\*\* CHANNEL f2 \*\*\*\*\*  
 CPDPRG2 waltz16  
 NUC2 1H  
 PCPD2 100.00 usec  
 PL2 -6.00 dB  
 PL12 13.74 dB  
 PL13 13.74 dB  
 SFO2 500.1320005 MHz

F2 - Processing parameters  
 SI 32768  
 SF 125.7578033 MHz  
 WDW EM  
 SSB 0  
 LB 1.00 Hz  
 GB 0  
 PC 1.40

1D NMR plot parameters  
 CX 20.00 cm  
 CY 10.90 cm  
 F1P 219.279 ppm  
 F1 27575.99 Hz  
 F2P -19.514 ppm  
 F2 -2454.04 Hz  
 PRNCD 11.93963 ppm/cm  
 HZCM 1501.50159 Hz/cm

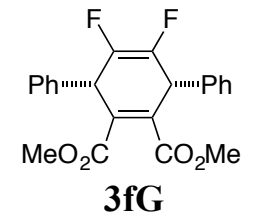

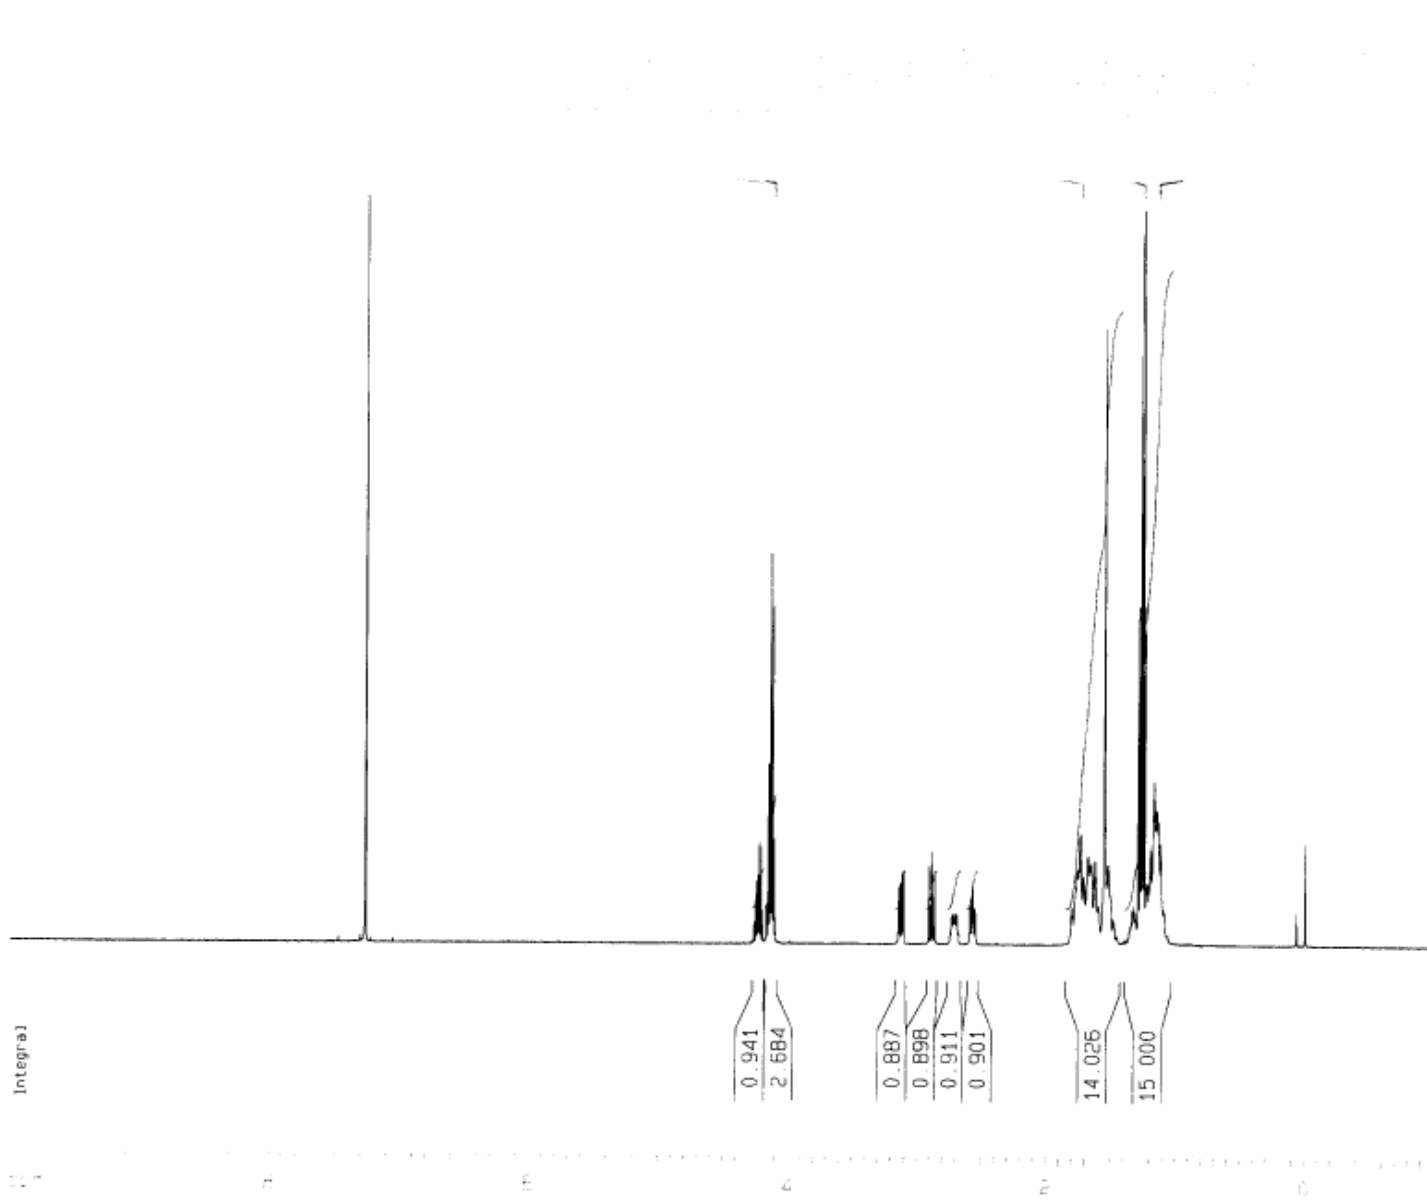

Current Data Parameters  
 NAME hondo-6-5-29  
 EXPNO 1  
 PROCNO 1

F2 - Acquisition Parameters  
 Date\_ 20060529  
 Time 17.04  
 INSTRUM drx500  
 PROBHD 5 mm Multinucl  
 PULPRDG 2930  
 TD 65536  
 SOLVENT CDCl3  
 NS 16  
 DS 2  
 SWH 10330.578 Hz  
 FIDRES 0.157632 Hz  
 AQ 3.1719923 sec  
 RG 645.1  
 DW 48 400 usec  
 DE 6.00 usec  
 TE 297.7 K  
 D1 1.00000000 sec  
 MCREST 0.00000000 sec  
 MCMRK 0.01500000 sec

===== CHANNEL f1 =====  
 NUC1 1H  
 P1 10.00 usec  
 PL1 -6.00 dB  
 SFO1 500 1330885 MHz

F2 - Processing parameters  
 SI 32768  
 SF 500.1300125 MHz  
 wDW EM  
 SSB 0  
 LB 0.30 Hz  
 GB 0  
 PC 1.00

1D NMR plot parameters  
 CX 20.00 cm  
 CY 11.21 cm  
 F1P 10.000 ppm  
 F1 5001.30 Hz  
 F2P -1.000 ppm  
 F2 -500.13 Hz  
 PPMCM 0.55000 ppm/cm  
 -HZCM 275.07150 Hz/cm

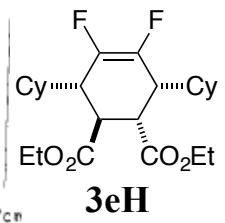

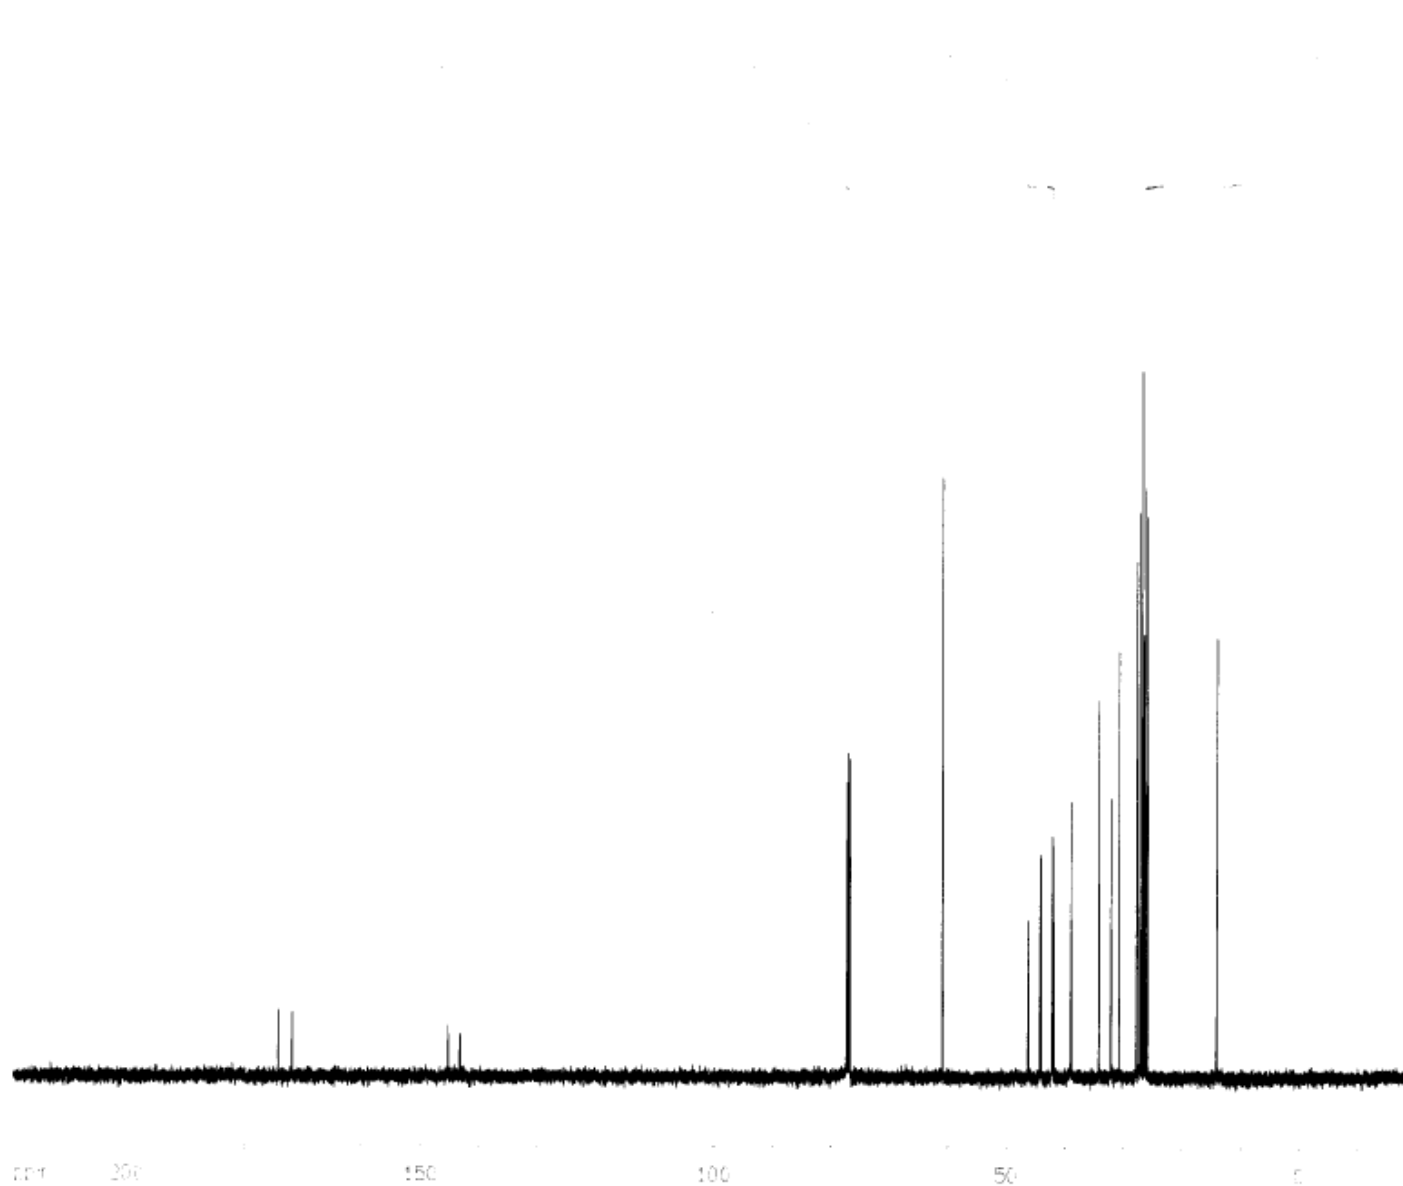

Current Data Parameters  
 NAME hondo-6-5-26  
 EXPNO 2  
 PROCNO 1

F2 - Acquisition Parameters  
 Date\_ 20060526  
 Time 20.25  
 INSTRUM drx500  
 PROBHD 5 mm Multinucl  
 PULPROG zgpg30  
 TO 65536  
 SOLVENT CDCl3  
 NS 256  
 DS 2  
 SWH 30030.029 Hz  
 FIDRES 0.458222 Hz  
 AQ 1.0912244 sec  
 RG 1024  
 DM 16.650 usec  
 DE 6.00 usec  
 TE 298.4 K  
 D1 0.50000000 sec  
 d11 0.03000000 sec  
 MCREST 0.00000000 sec  
 MCWRK 0.01500000 sec

----- CHANNEL f1 -----  
 NUC1 13C  
 P1 11.00 usec  
 PL1 -3.00 dB  
 SF01 125.7703643 MHz

----- CHANNEL f2 -----  
 CPDPRG2 waltz16  
 NUC2 1H  
 PCP02 100.00 usec  
 PL2 -6.00 dB  
 PL12 17.00 dB  
 PL13 19.00 dB  
 SF02 500.1320005 MHz

F2 - Processing parameters  
 SI 32768  
 SF 125.7577923 MHz  
 MDW EM  
 SSB 0  
 LB 1.00 Hz  
 GB 0  
 PC 1.40

1D NMR plot parameters  
 CX 20.00 cm  
 CY 10.24 cm  
 F1P 219.366 ppm  
 F1 27587.00 Hz  
 F2P -19.426 ppm  
 F2 -2443.03 Hz  
 PPMCM 11.93963 ppm/cm  
 HZCM 1501.50146 Hz/cm

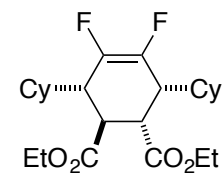

3eH

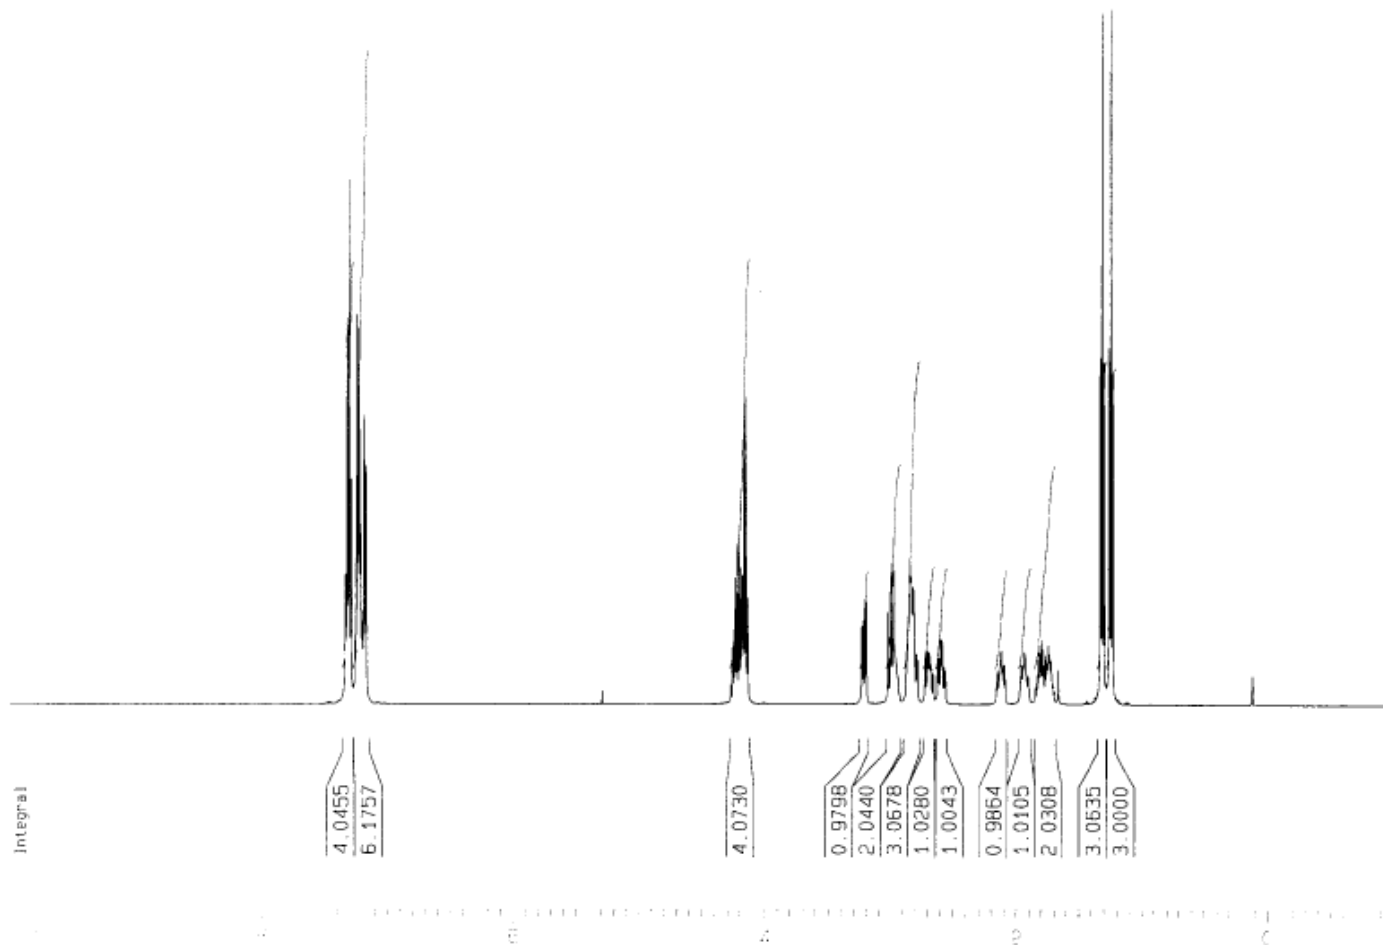

Current Data Parameters  
 NAME hondo-6-1-26  
 EXPNO 3  
 PROCNO 1

F2 - Acquisition Parameters  
 Date\_ 20060126  
 Time 21.33  
 INSTRUM drx500  
 PROBHD 5 mm Multinucl  
 PULPROG zg30  
 TD 65536  
 SOLVENT CDCl3  
 NS 16  
 DS 2  
 SWH 10330.578 Hz  
 FIDRES 0.157632 Hz  
 AQ 3.1719923 sec  
 RG 40.3  
 DW 48.400 usec  
 DE 6.00 usec  
 TE 294.4 K  
 D1 1.0000000 sec  
 MCREST 0.0000000 sec  
 MCWAK 0.0150000 sec

===== CHANNEL f1 =====  
 NUC1 1H  
 P1 10.30 usec  
 PL1 -6.00 dB  
 SFO1 500.1330885 MHz

F2 - Processing parameters  
 SI 32768  
 SF 500.1300124 MHz  
 WDW EM  
 SSB 0  
 LB 0.30 Hz  
 GB 0  
 PC 1.00

1D NMR plot parameters  
 CX 20.00 cm  
 CY 10.20 cm  
 F1P 10.000 ppm  
 F1 5001.30 Hz  
 F2P -1.000 ppm  
 F2 -500.13 Hz  
 PPMCM 0.55000 ppm/cm  
 HZCM 275.07150 Hz/cm

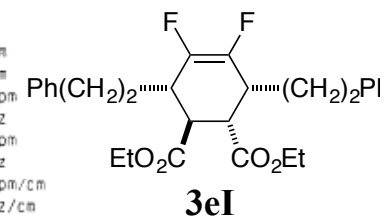

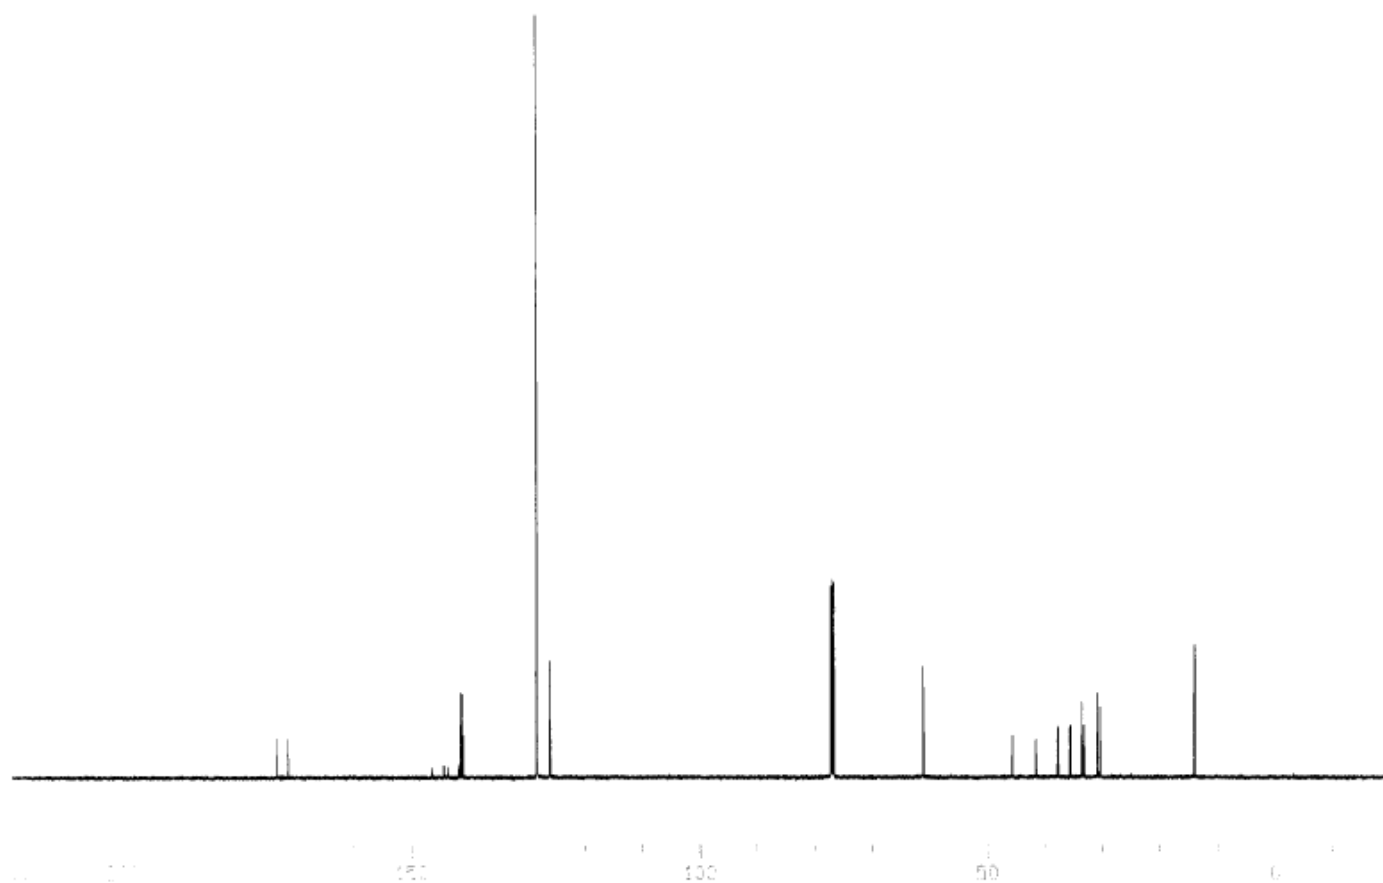

Current Data Parameters  
 NAME nondo-5-1-26  
 EXPNO 4  
 PROCNO 1

F2 - Acquisition Parameters  
 Date\_ 20050126  
 Time 21.44  
 INSTRUM drx500  
 PROBHD 5 mm Multinucl  
 PULPROG zgpg30  
 TO 65536  
 SOLVENT CDCl3  
 NS 256  
 DS 2  
 SWH 30030.029 Hz  
 FIDRES 0.458222 Hz  
 AQ 1.0912244 sec  
 RG 3649.1  
 DW 16.650 usec  
 DE 5.00 usec  
 TE 295.4 K  
 D1 0.5000000 sec  
 d11 0.0300000 sec  
 MCREST 0.0000000 sec  
 MCMRK 0.0150000 sec

\*\*\*\*\* CHANNEL f1 \*\*\*\*\*  
 NUC1 13C  
 P1 18.50 usec  
 PL1 -6.00 dB  
 SFO1 125.7703643 MHz

\*\*\*\*\* CHANNEL f2 \*\*\*\*\*  
 CPDPRG2 waltz16  
 NUC2 1H  
 PCPD2 100.00 usec  
 PL2 -6.00 dB  
 PL12 13.74 dB  
 PL13 13.74 dB  
 SFO2 500.1320005 MHz

F2 - Processing parameters  
 SI 32768  
 SF 125.7578042 MHz  
 NDM EM  
 SSB 0  
 LB 1.00 Hz  
 GB 0  
 PC 1.40

1D NMR plot parameters  
 CX 20.00 cm  
 CY 11.18 cm  
 F1P 219.271 ppm  
 F1 27575.08 Hz  
 F2P -19.521 ppm  
 F2 -2454.95 Hz  
 RFMCM 11.93963 ppm/cm  
 HZCM 1501.50134 Hz/cm

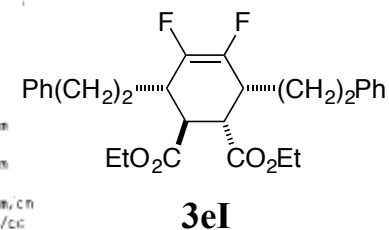

Supplement: c6ra00569a1.pdf [file c6ra00569a1.pdf]
